# Supplementary material for: Decarbonylative cycloaddition of 1H-indene-1,2,3-trione and norbornene via rhodium(i)-catalyzed carbon–carbon bond cleavage
Source: Royal Society of Chemistry journal article supplement (doi:10.1039/d2nj01708c), 2022-01-01
Supplement: d2nj01708c1.pdf [file d2nj01708c1.pdf]

## Supporting Information

### Decarbonylative Cycloaddition of 1*H*-Indene-1,2,3-trione and Norbornene *via* Rhodium(I)-Catalyzed Carbon–Carbon Bond Cleavage

Zhenzhu Hu,<sup>†, §</sup> Yuhang Wang,<sup>†, §</sup> Peng Ma,<sup>†, §</sup> Jianhui Wang,<sup>\*, †, §</sup> Guiyan Liu<sup>\*, ‡</sup>

*†*Department of Chemistry, College of Science, Tianjin University, Tianjin 300350, P.  
R. China.

*§* Collaborative Innovation Center of Chemical Science and Engineering (Tianjin)  
30072, P. R. China.

*‡*Tianjin Key Laboratory of Structure and Performance for Functional Molecules;  
Key Laboratory of Inorganic-Organic hybrid Functional Material Chemistry; College  
of Chemistry, Tianjin Normal University, Tianjin, 300387, P. R. China

Fax: (+86)-22-2740-3475

E-mail: wjh@tju.edu.cn; guiyanliu2013@163.com

#### Contents

|                                                                                                |    |
|------------------------------------------------------------------------------------------------|----|
| S1. Preparation of substituted ninhydrin .....                                                 | S2 |
| S2. Chiral HPLC of compound <b>3a</b> .....                                                    | S3 |
| S3. References .....                                                                           | S3 |
| S4. <sup>1</sup> H NMR, <sup>19</sup> F NMR and <sup>13</sup> C NMR spectrum of products ..... | S4 |

## S1. Preparation of substituted ninhydrin

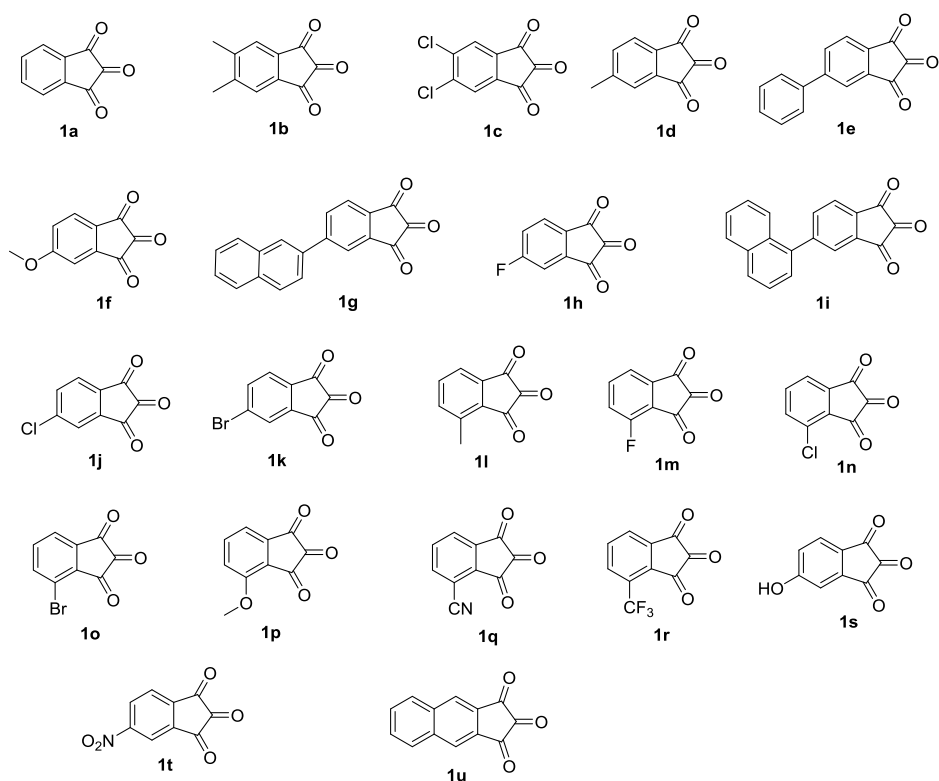

The substituted ninhydrin **1a-d**<sup>[1,2]</sup>, **1e**, **1g**, **1i**<sup>[3]</sup>, **1f**, **1h**, **1j-lu**<sup>[1,2]</sup> were synthesized according to the literature.

## S2. Chiral HPLC of compound 3a

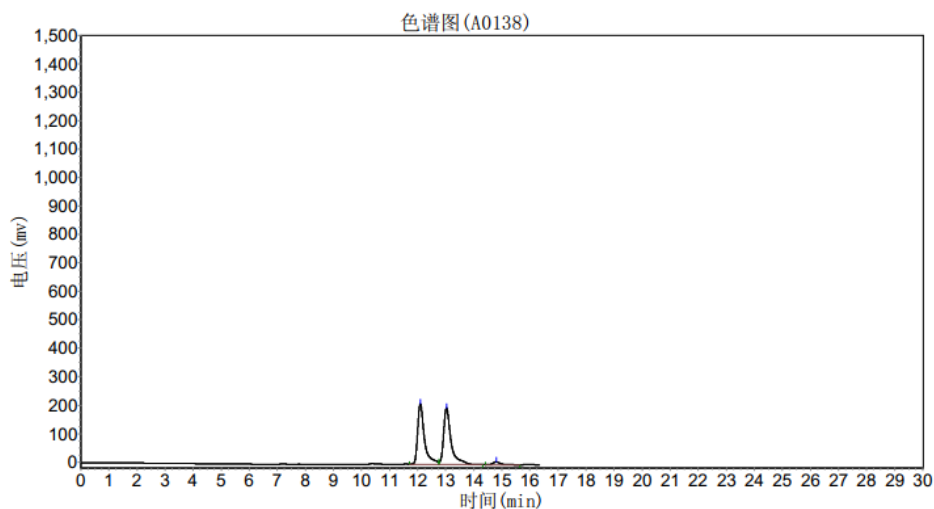

分析结果表

| 峰号 | 峰名 | 保留时间   | 峰高         | 峰面积         | 含量      |
|----|----|--------|------------|-------------|---------|
| 1  |    | 12.098 | 214416.609 | 3674375.250 | 48.3887 |
| 2  |    | 13.032 | 199782.141 | 3721031.250 | 49.0031 |
| 3  |    | 14.798 | 10137.442  | 198055.141  | 2.6082  |
| 总计 |    |        | 424336.192 | 7593461.641 | 100.000 |

Chiral HPLC (Chiralcel OD-H, hexane:isopropanol = 90:1, 0.4mL/min, 230 nm) of compound **3a**.

## S3. References

1. G. Xu, Y. Yang, Y. Yang, G. Song, S. Li, J. Zhang, W. Yang, L.-L. Wang, Z. Weng, Z. Zuo, *Eur. J. Med. Chem.*, 2020, **191**, 112.
2. C. Marminon, A. Nacereddine, Z. Bouaziz, P. Nebois, J. Jose, M. Borgne, *Tetrahedron Lett.*, 2015, **56**, 1840.
3. W. Guo, S. Wu, T. Wang, Q. Xie, Y. Duan, S. Luo, J. Wang, X. Yu, *Org. Chem. Front.*, 2018, **5**, 1613.

S4.  $^1\text{H}$  NMR,  $^{19}\text{F}$  NMR and  $^{13}\text{C}$  NMR spectrum of products

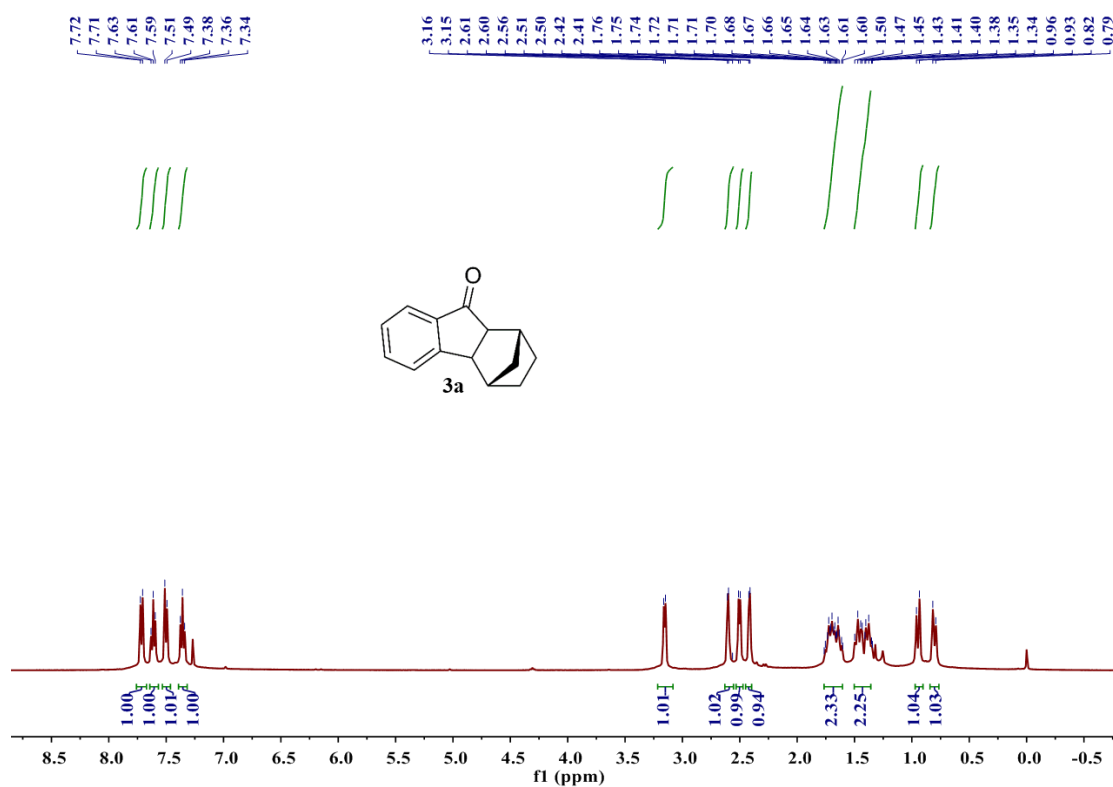

$^1\text{H}$  NMR for compound **3a**

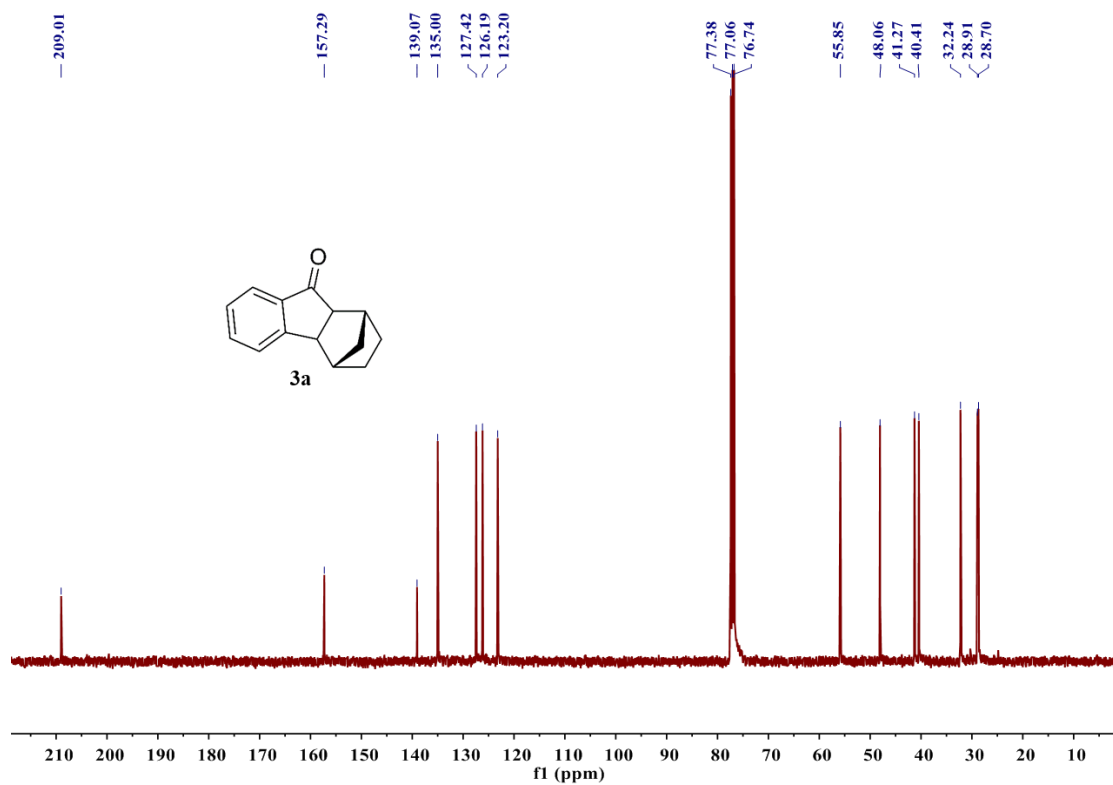

$^{13}\text{C}$  NMR for compound **3a**

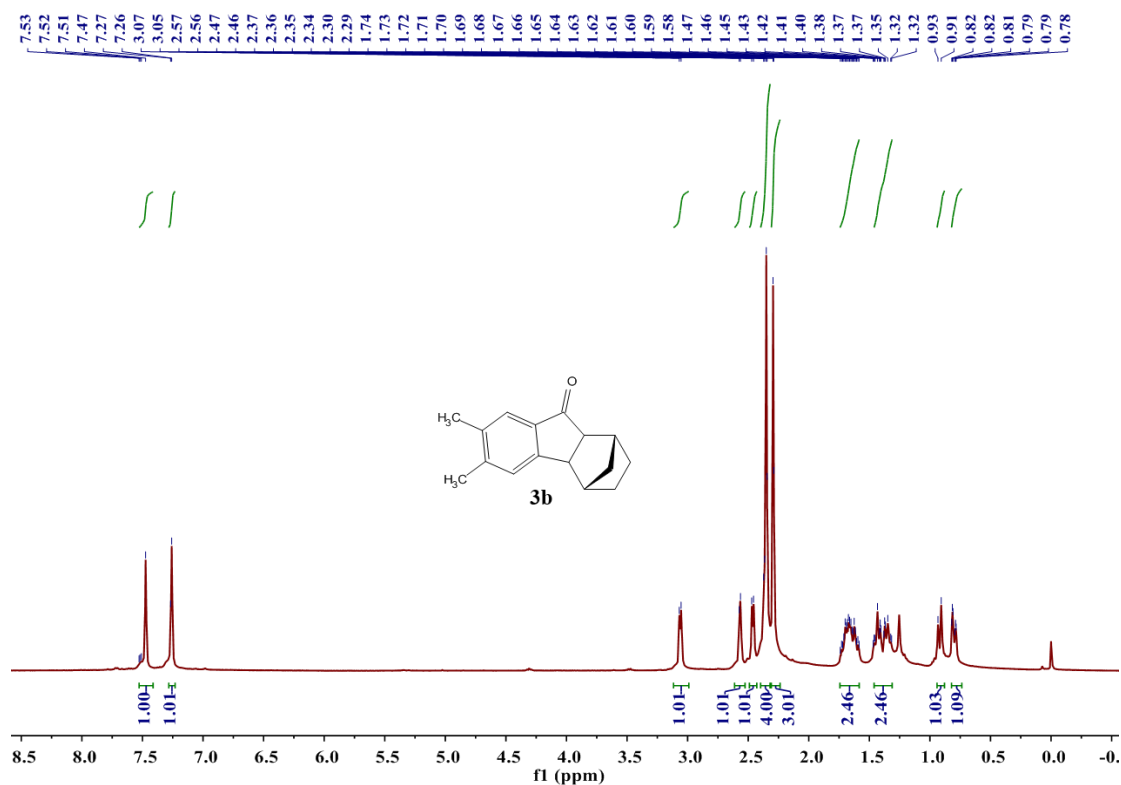

<sup>1</sup>H NMR for compound 3b

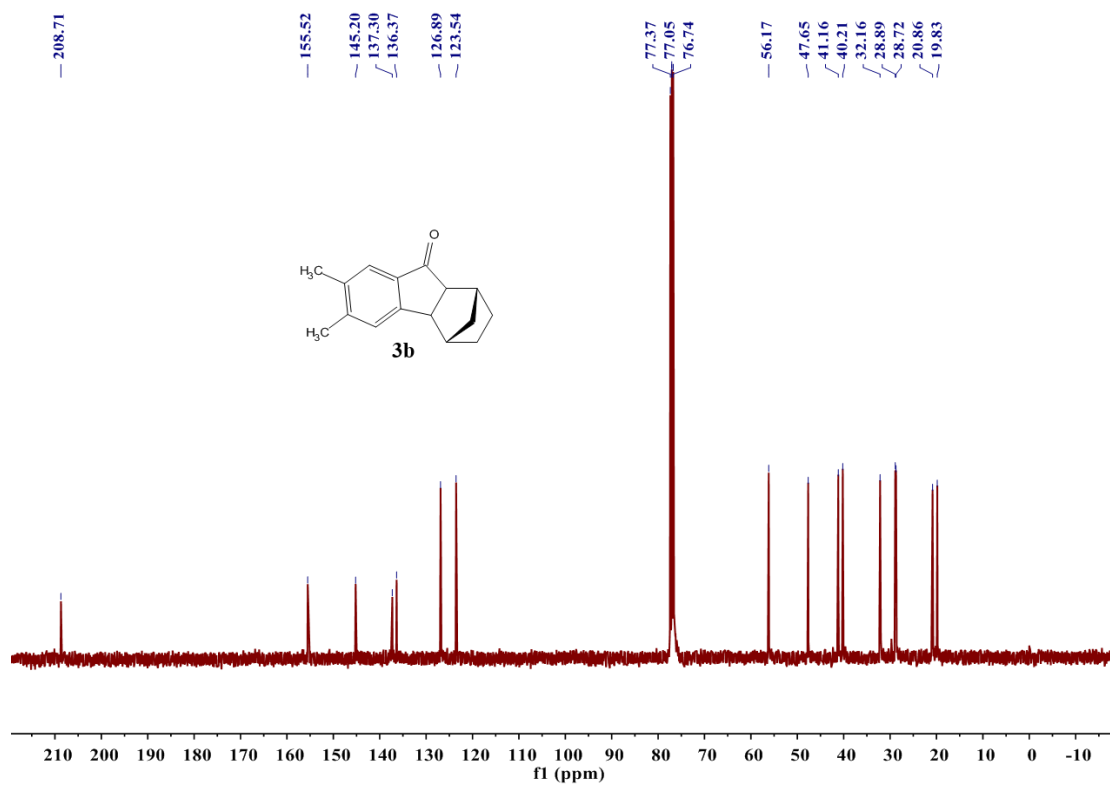

<sup>13</sup>C NMR for compound 3b

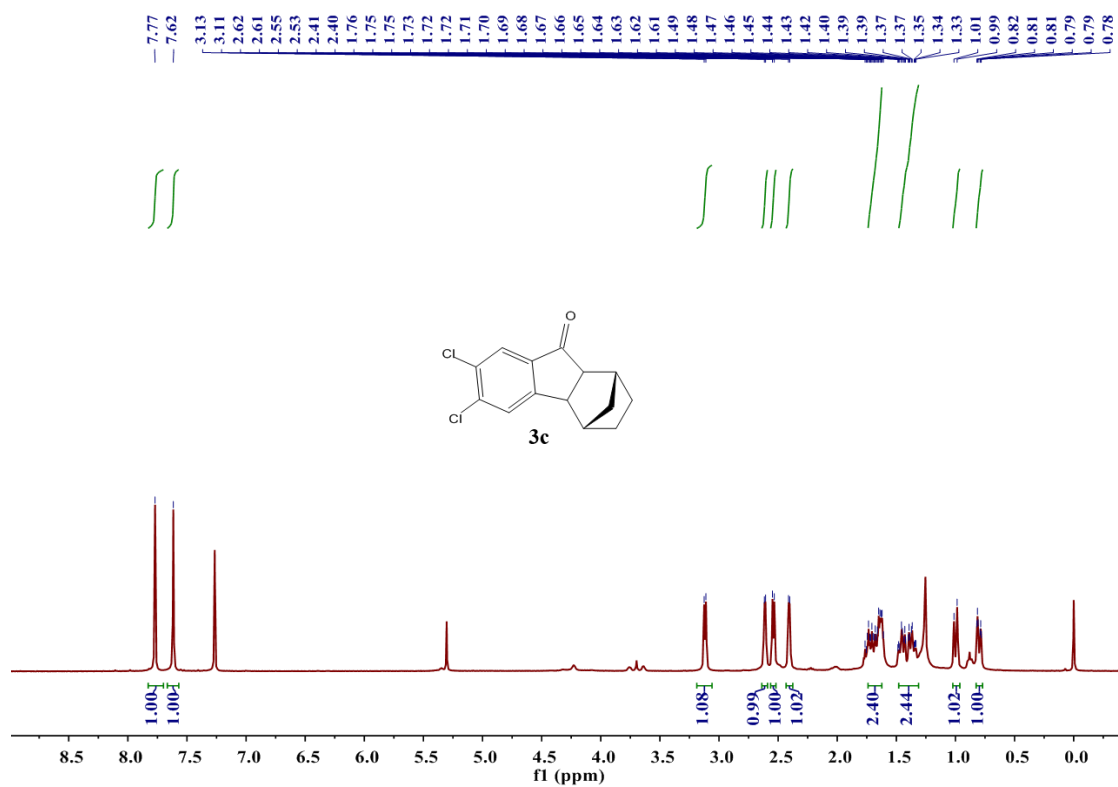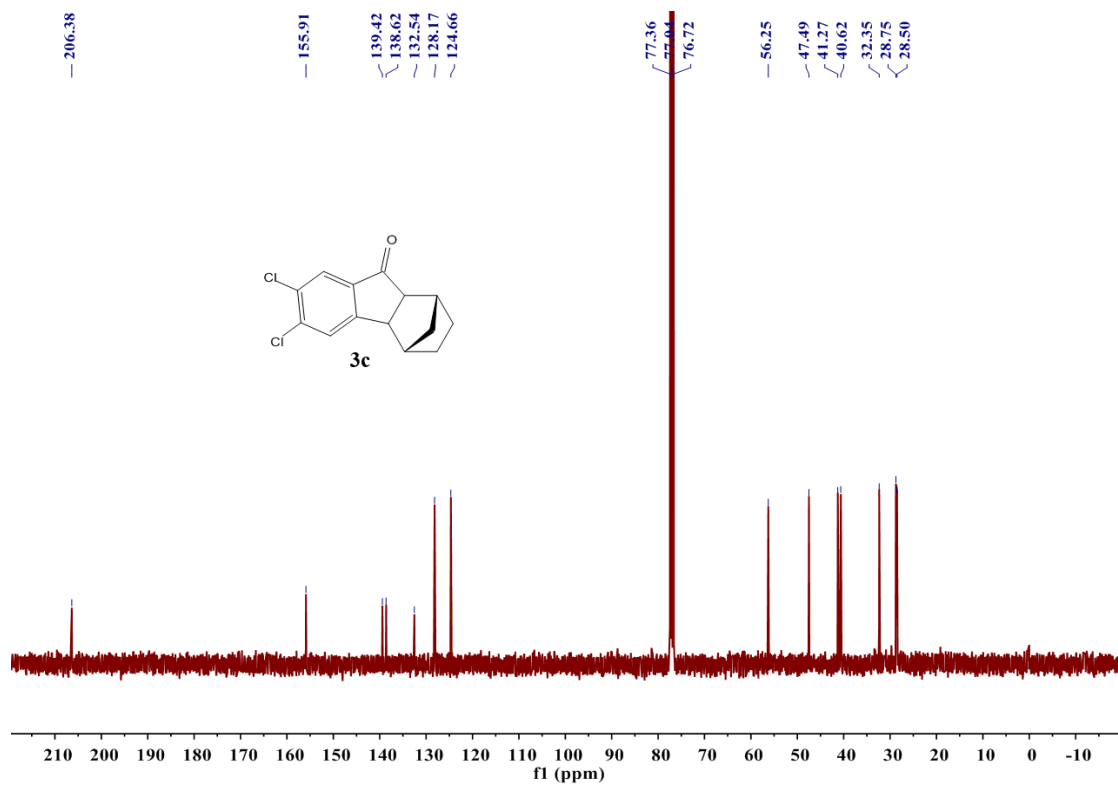

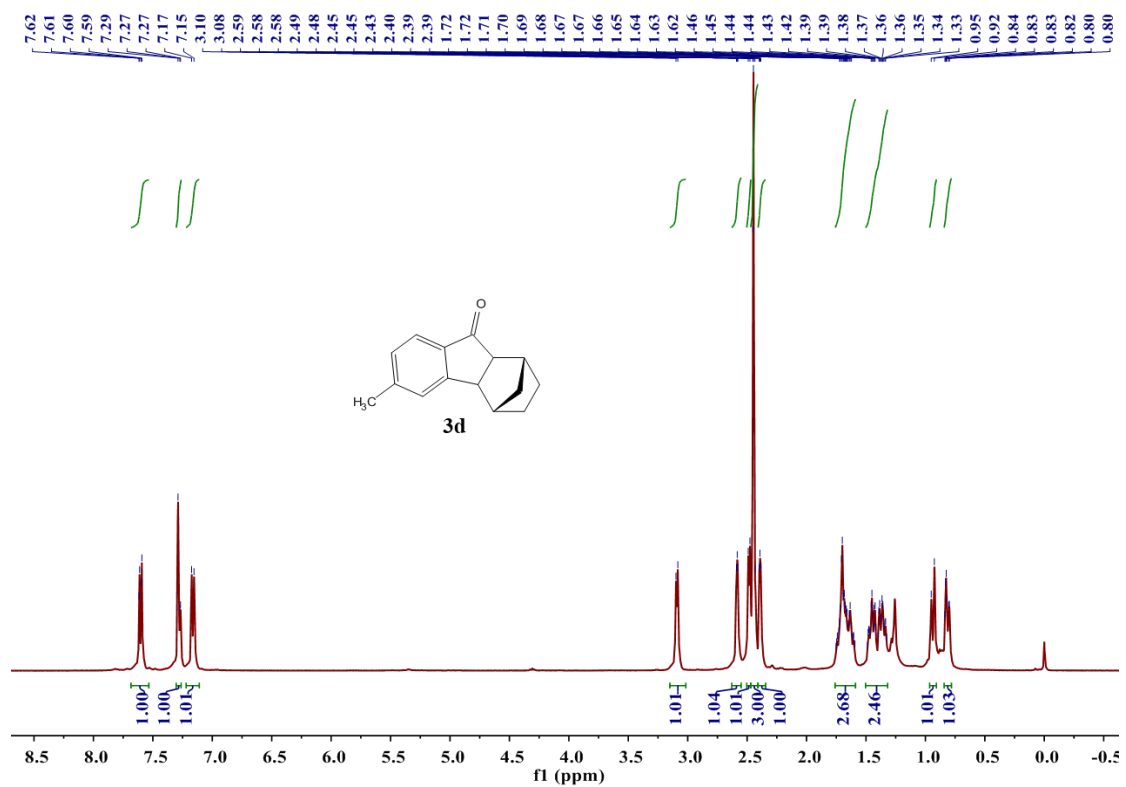

**<sup>1</sup>H NMR for compound 3d**

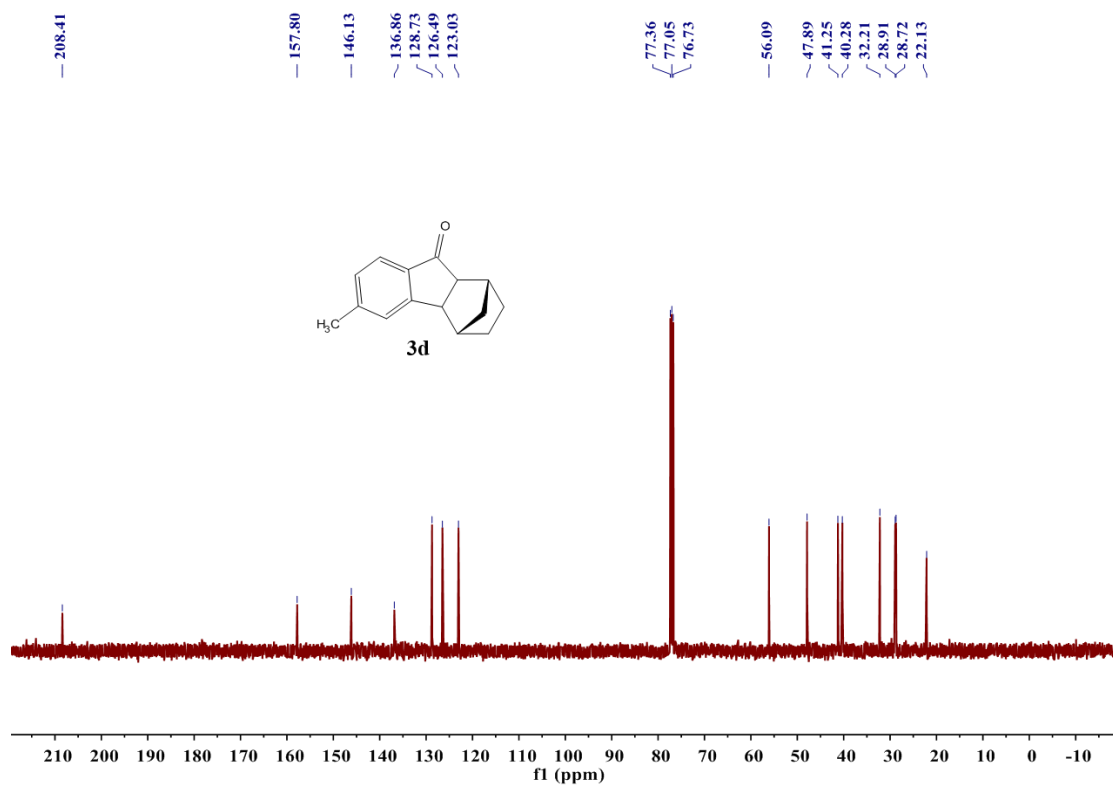

**<sup>13</sup>C NMR for compound 3d**

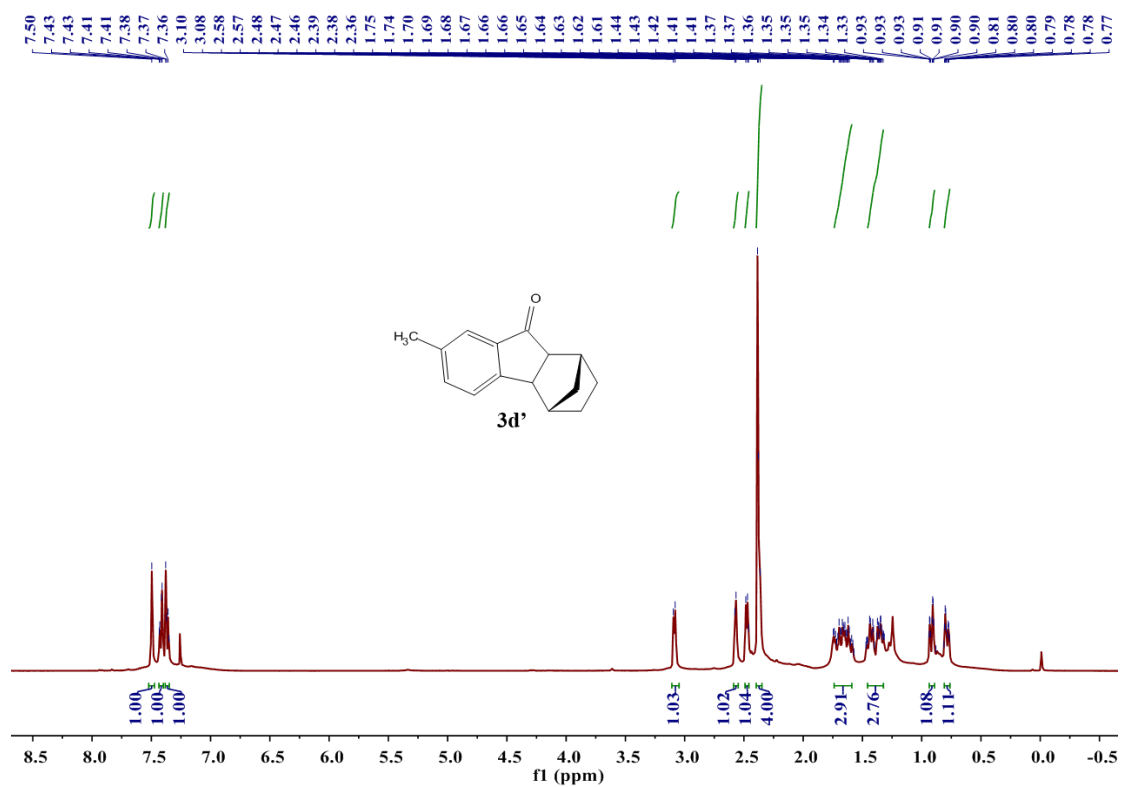

**<sup>1</sup>H NMR for compound 3d'**

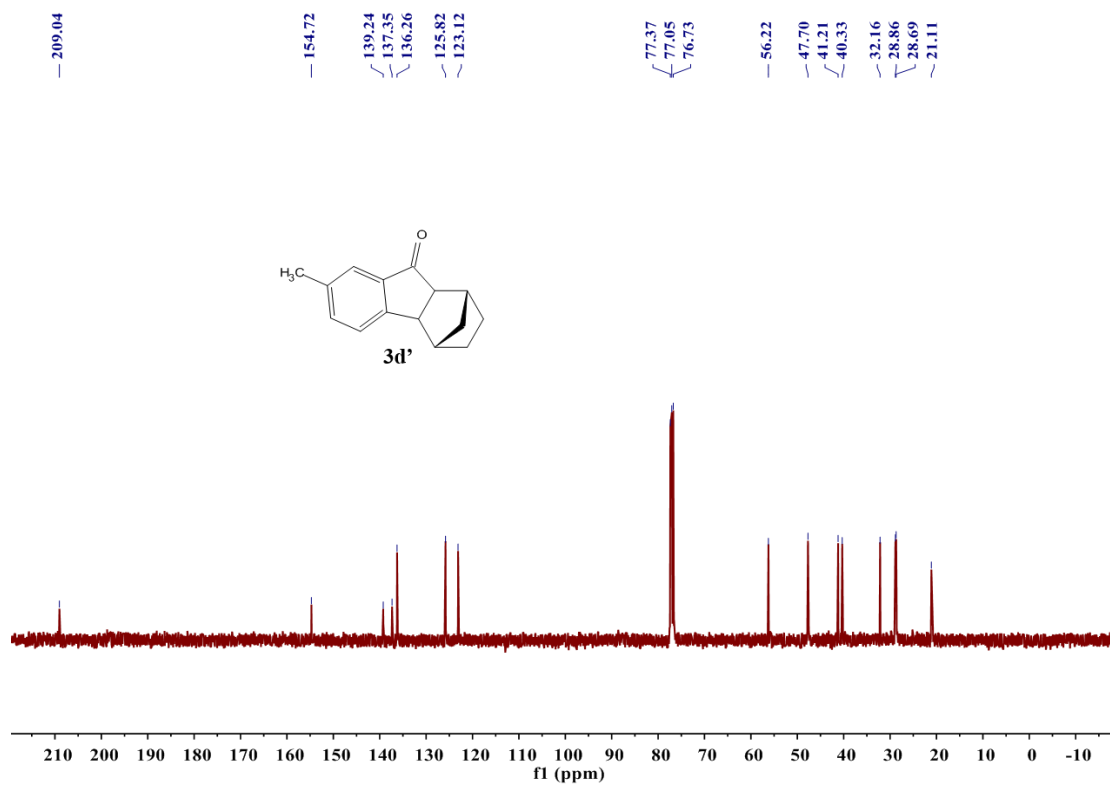

**<sup>13</sup>C NMR for compound 3d'**



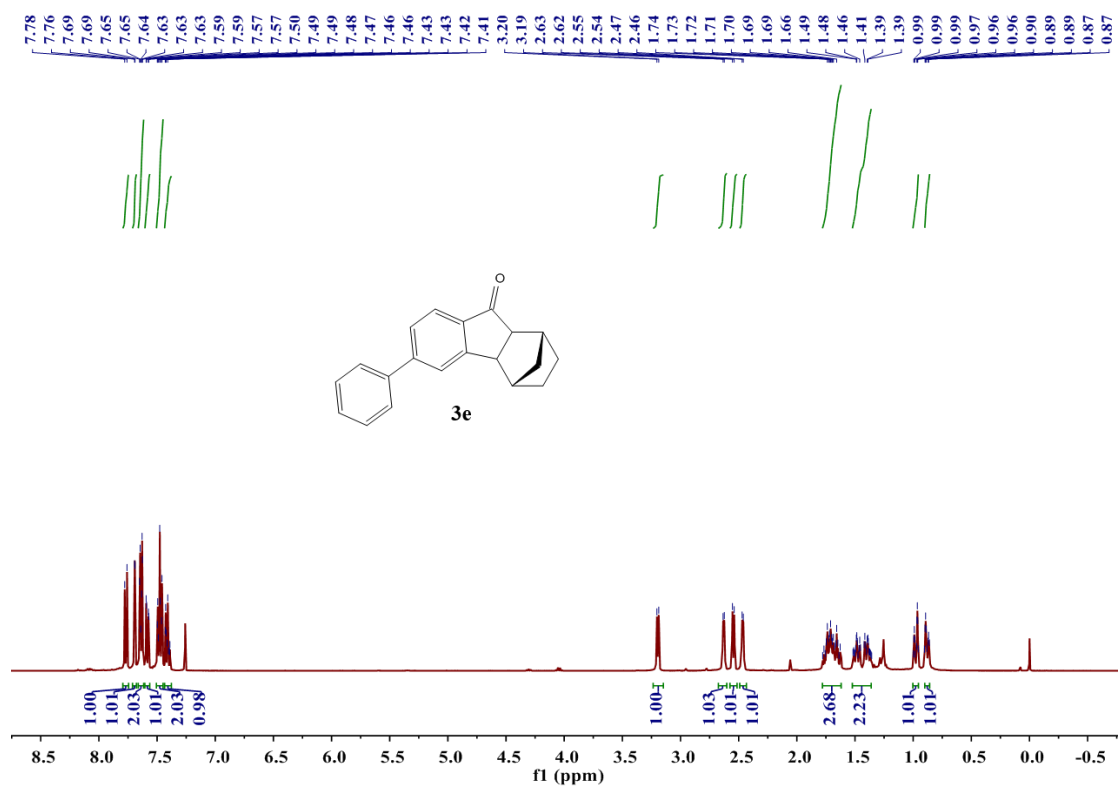

<sup>1</sup>H NMR for compound **3e**

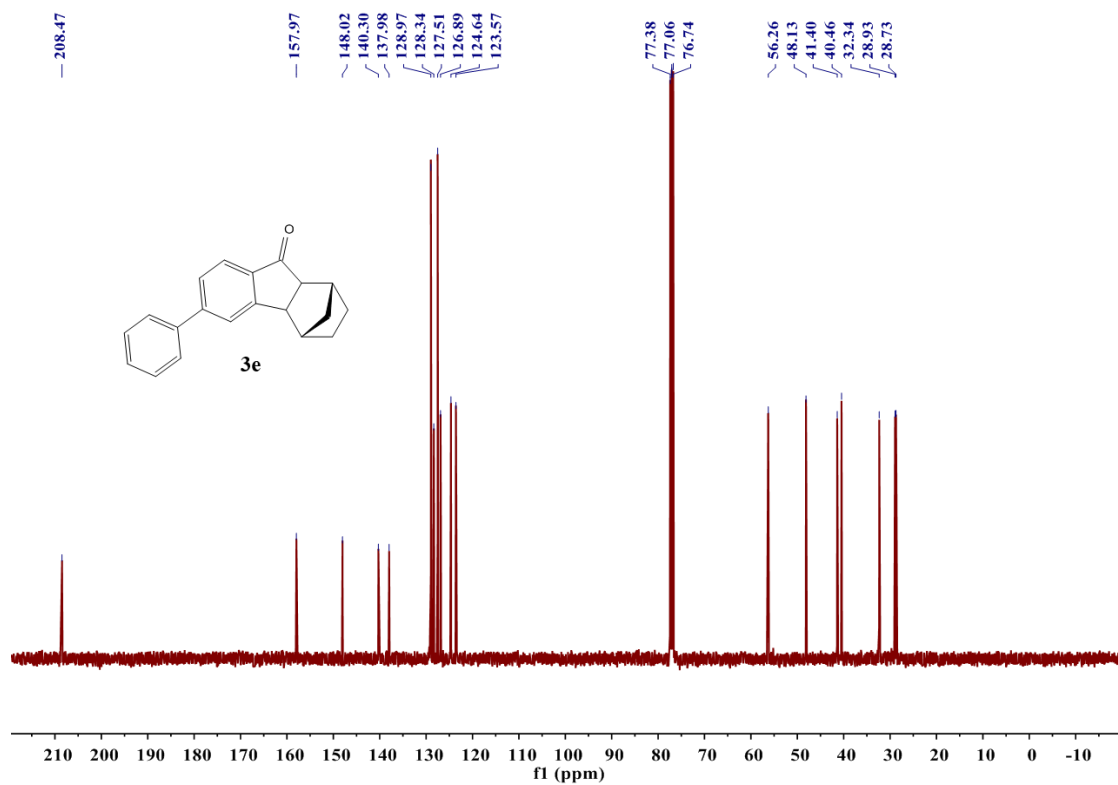

<sup>13</sup>C NMR for compound **3e**

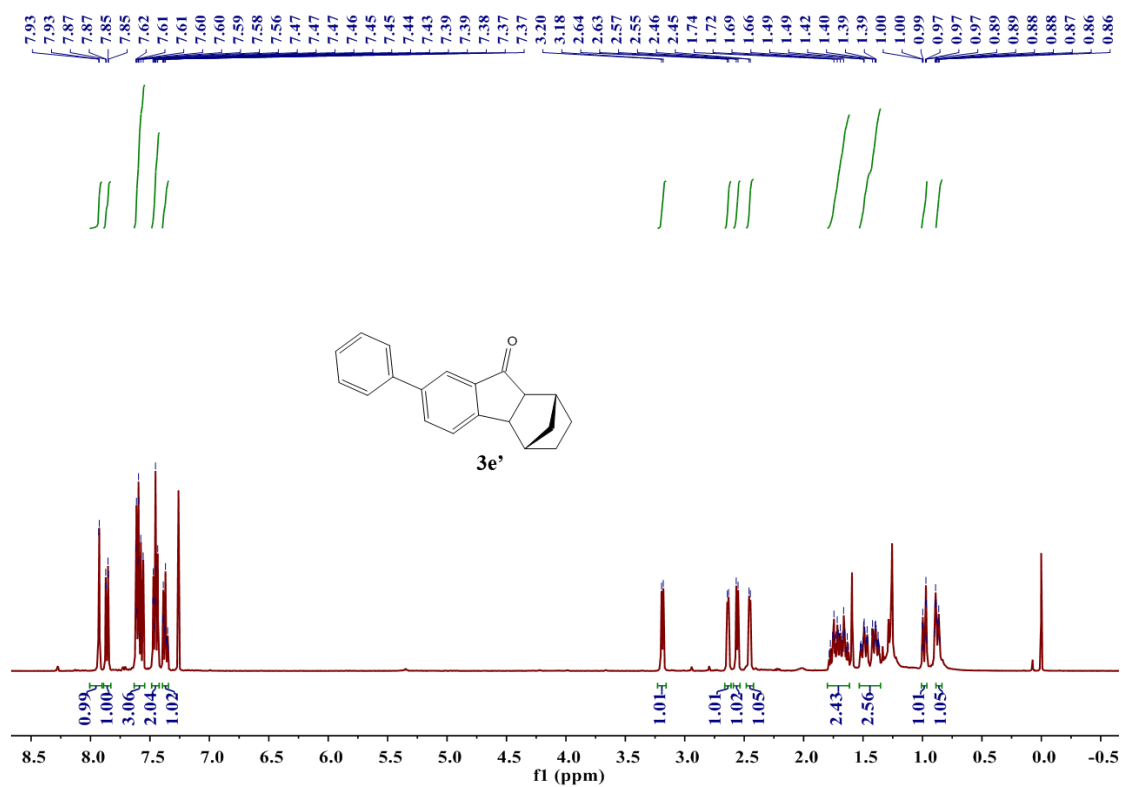

<sup>1</sup>H NMR for compound 3e'

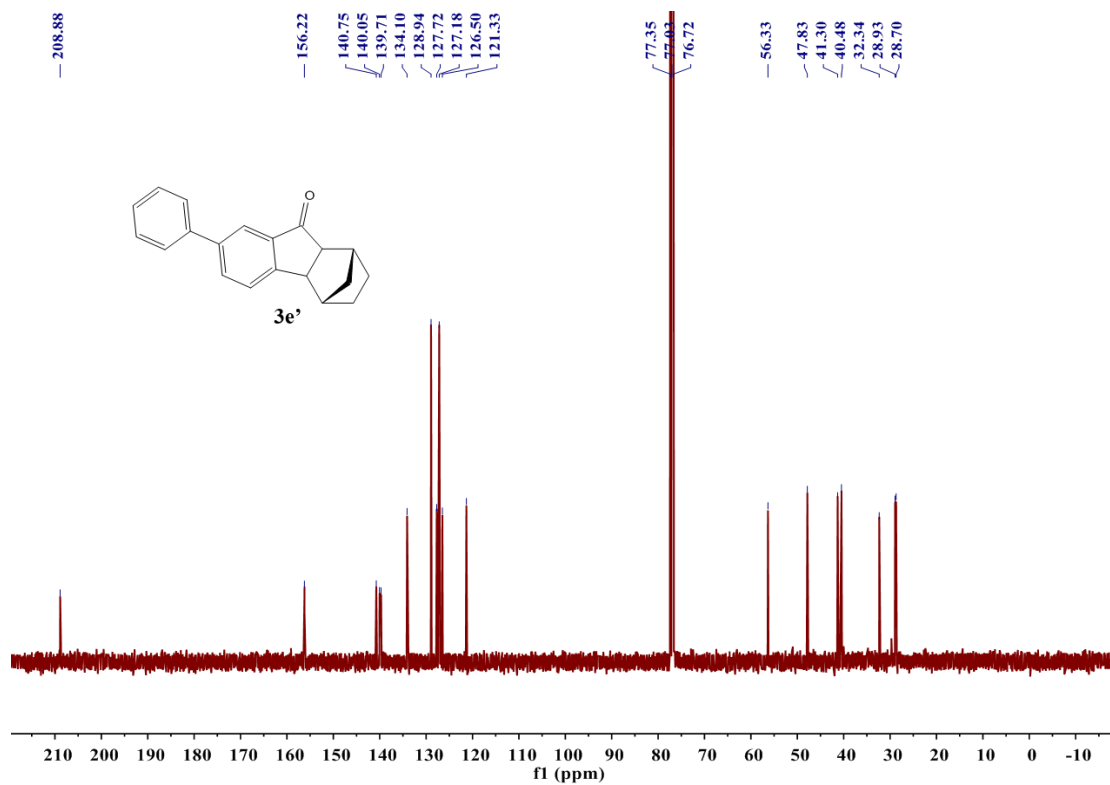

<sup>13</sup>C NMR for compound 3e'

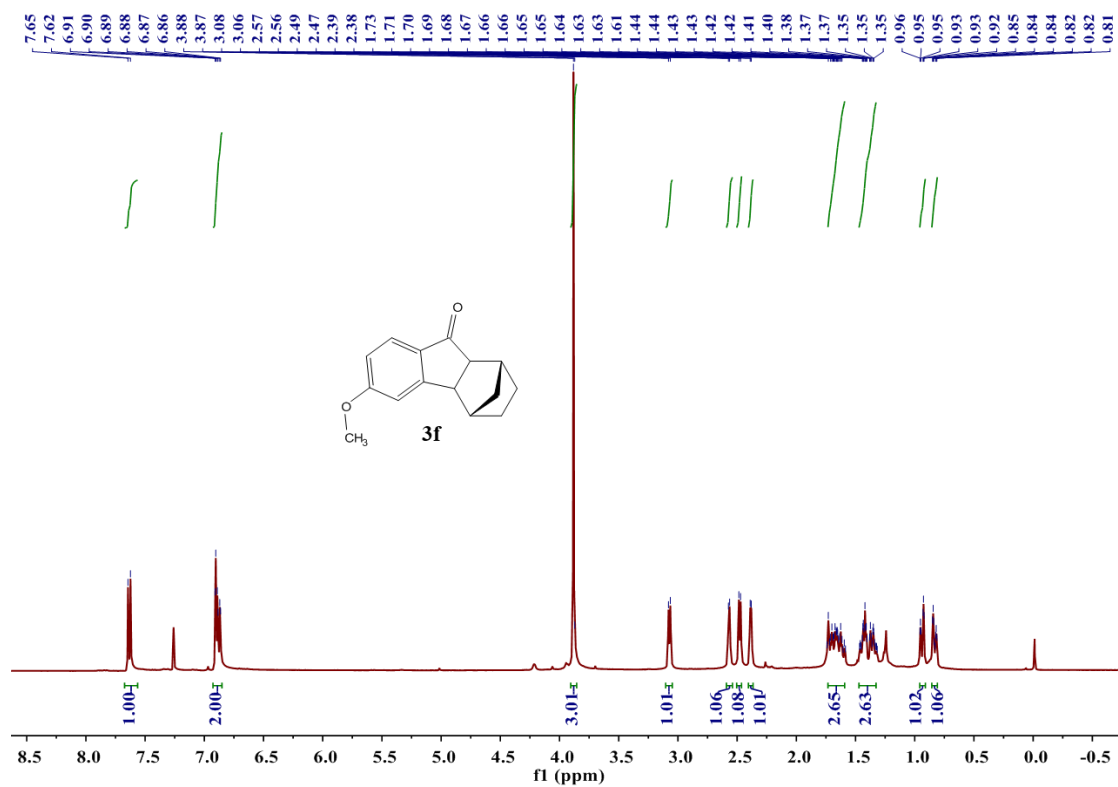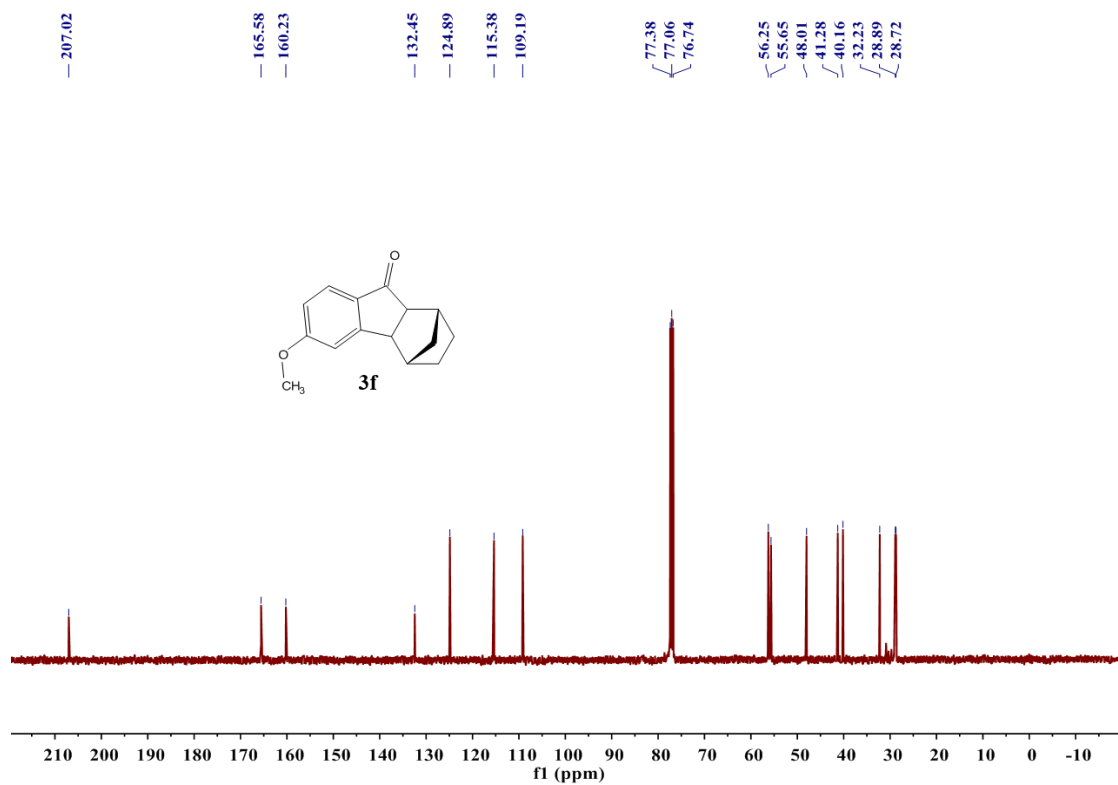

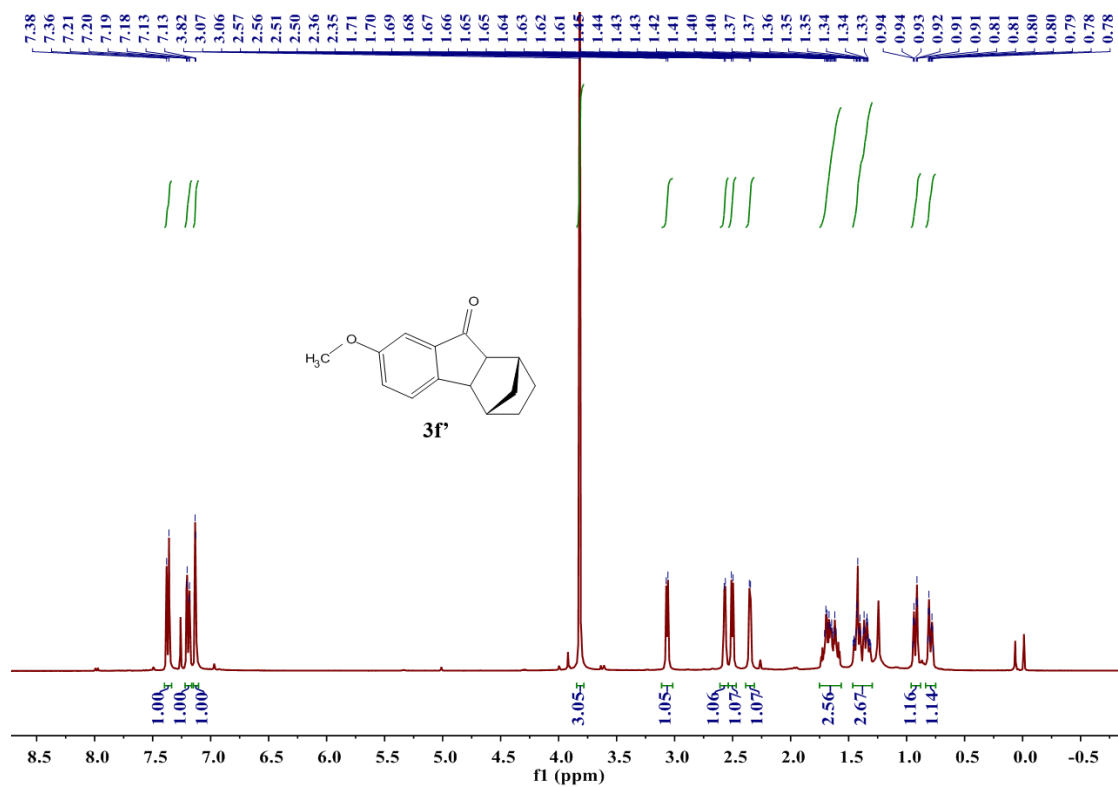

**<sup>1</sup>H NMR for compound 3f'**

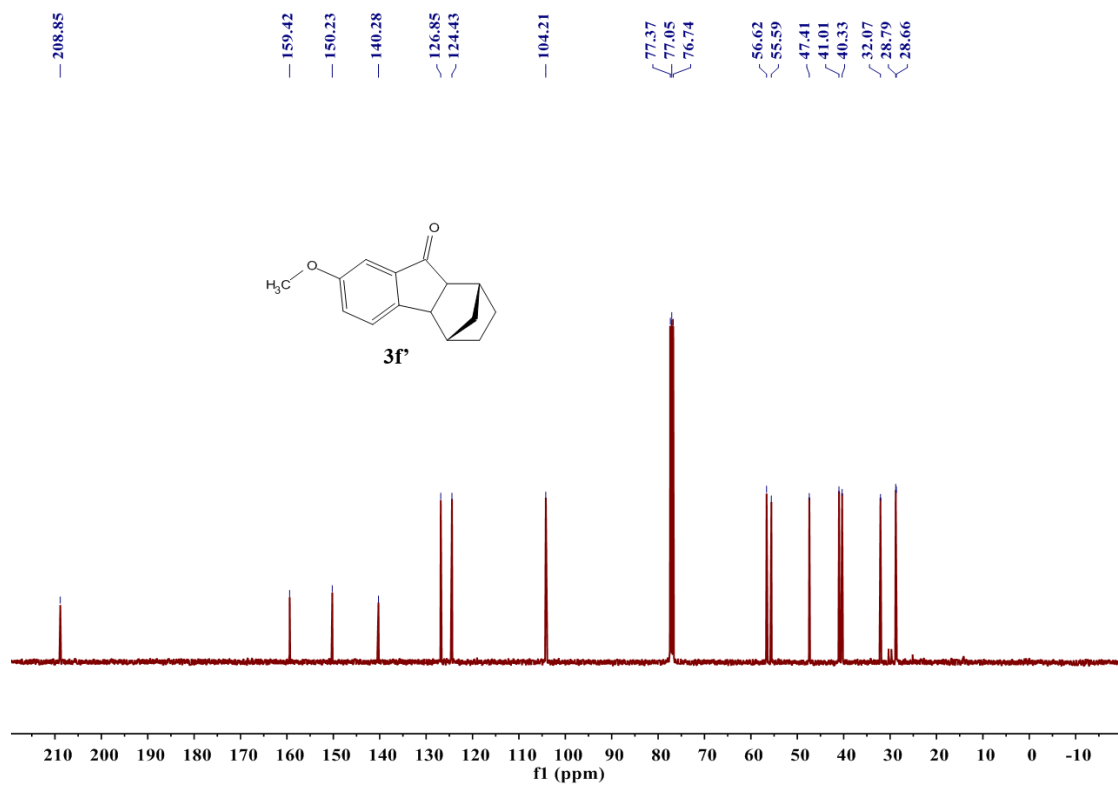

**<sup>13</sup>C NMR for compound 3f'**

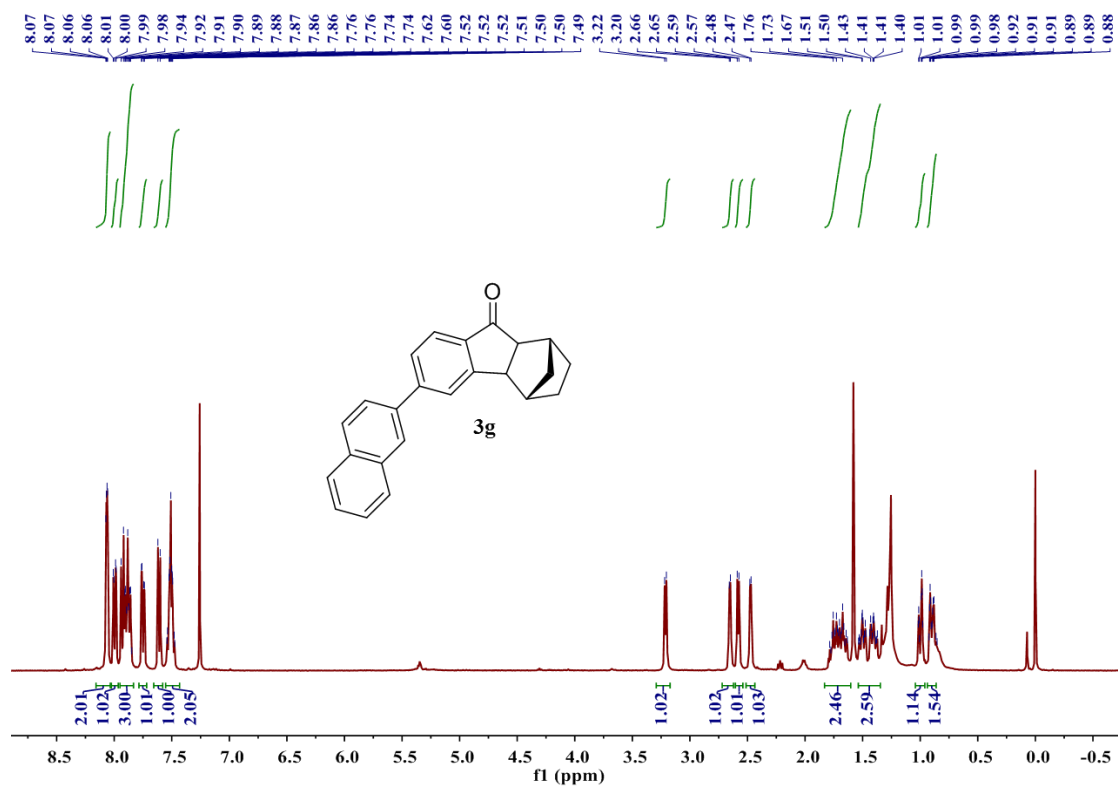

<sup>1</sup>H NMR for compound 3g

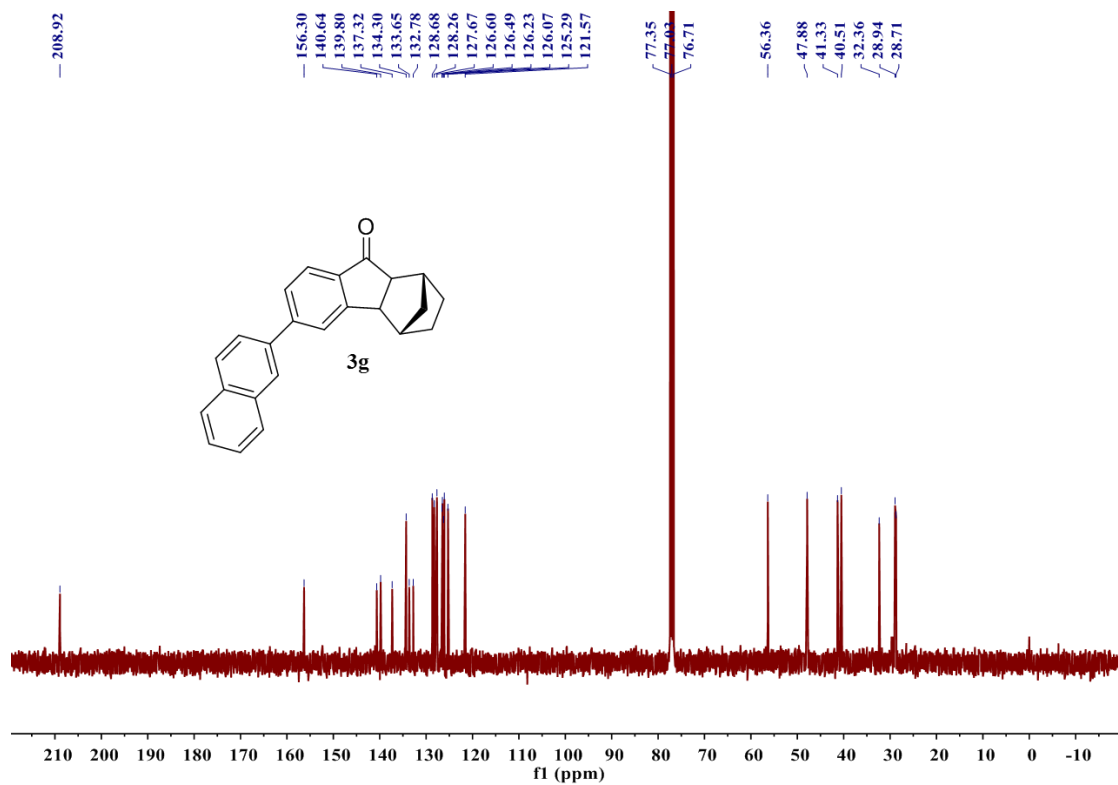

<sup>13</sup>C NMR for compound 3g

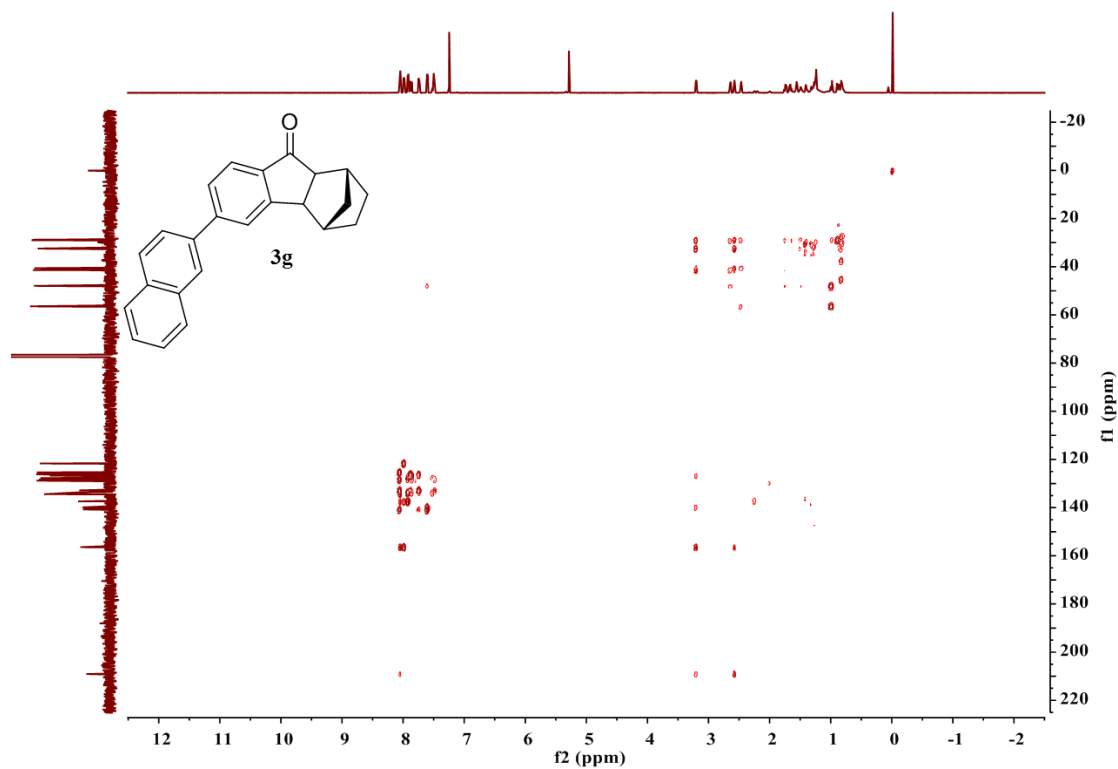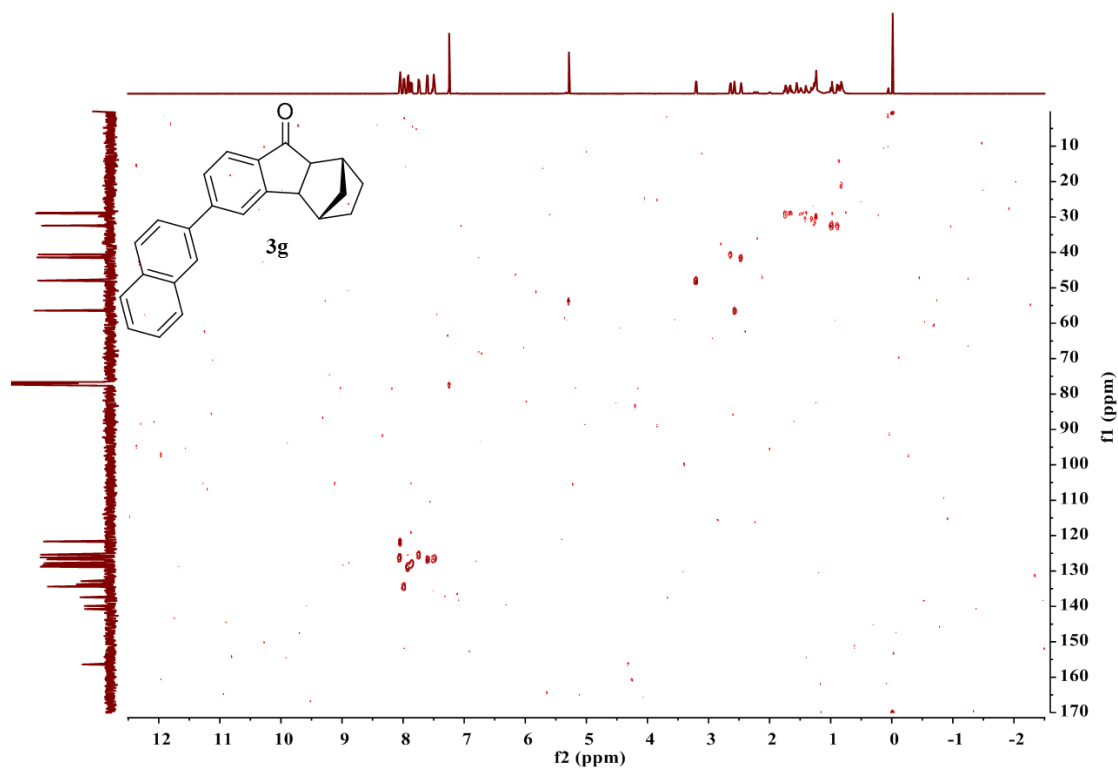

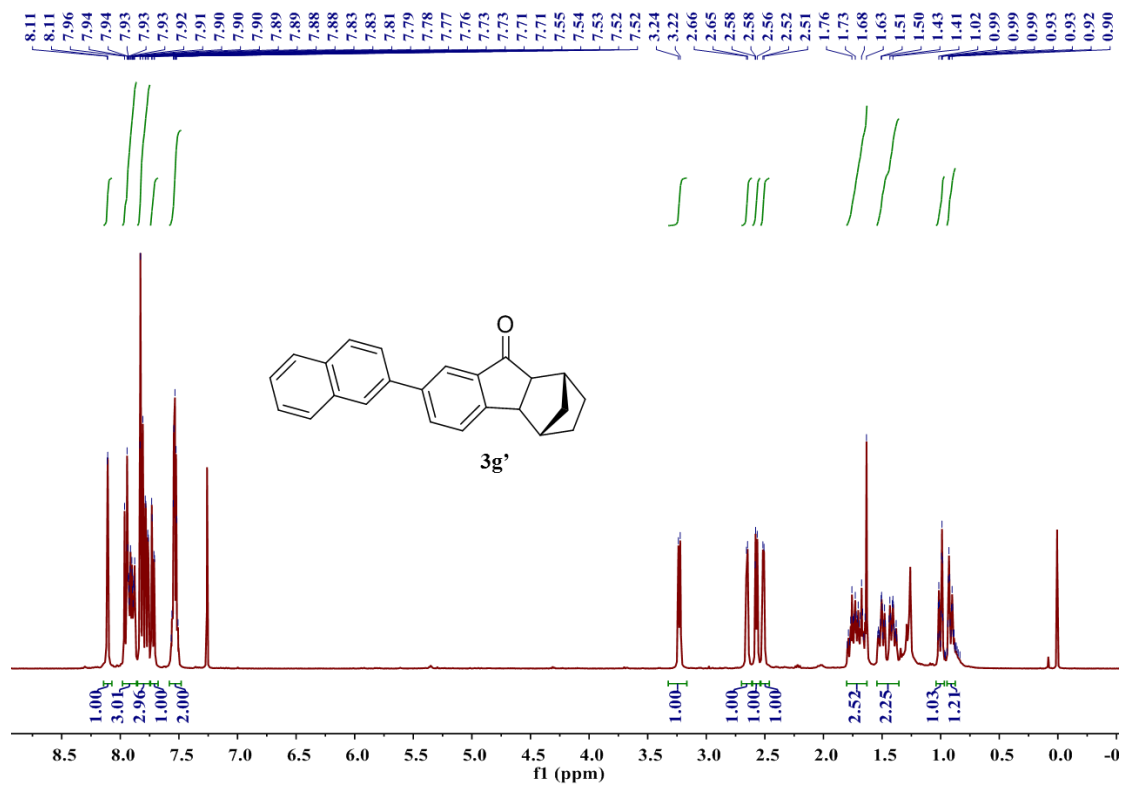

**<sup>1</sup>H NMR for compound 3g'**

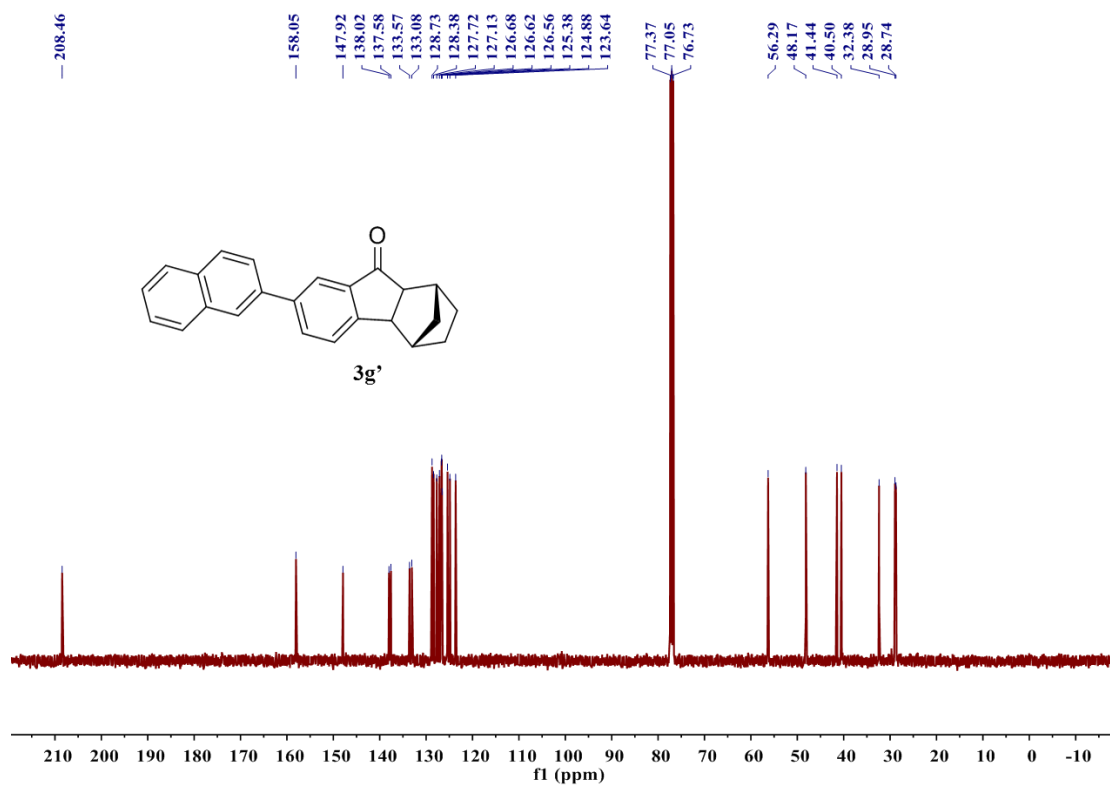

**<sup>13</sup>C NMR for compound 3g'**

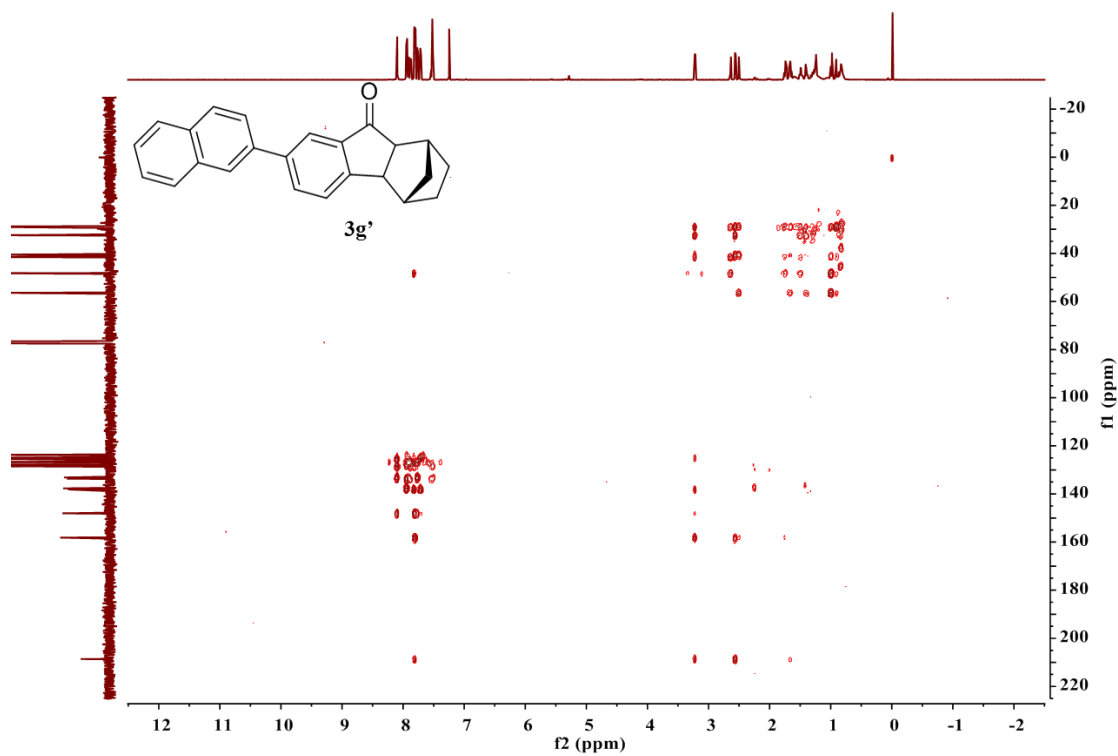

The HMBC spectrum of the compound **3g'** in CDCl<sub>3</sub>.

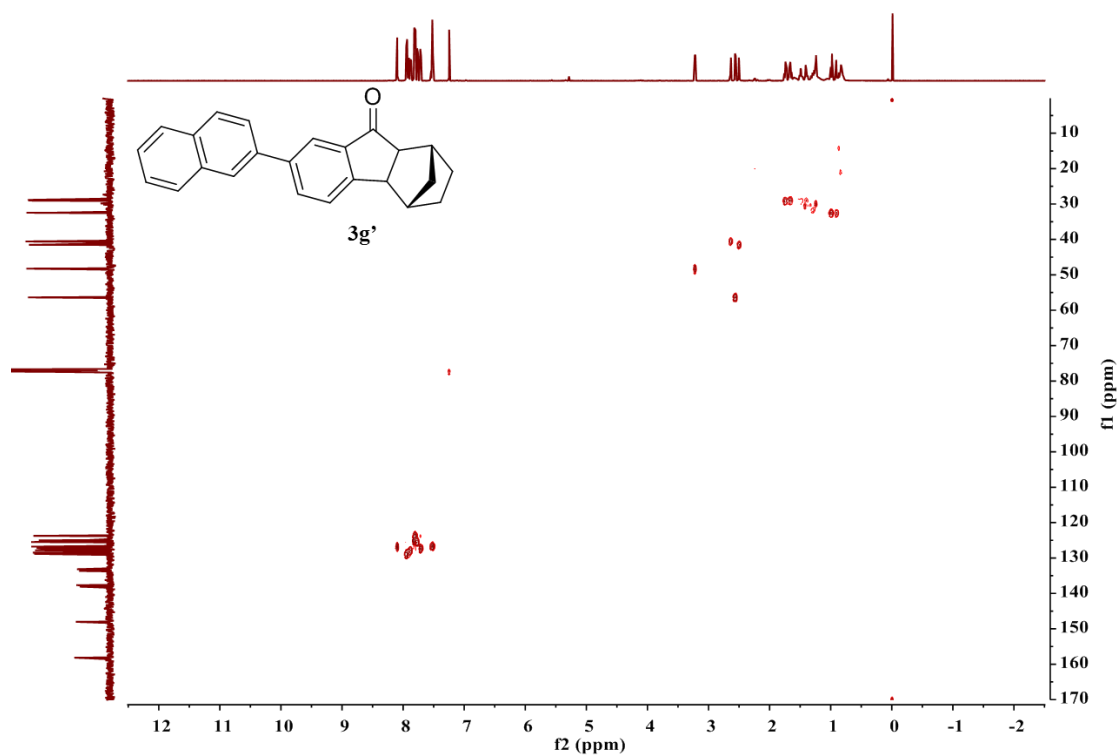

The HMQC spectrum of the compound **3g'** in CDCl<sub>3</sub>.



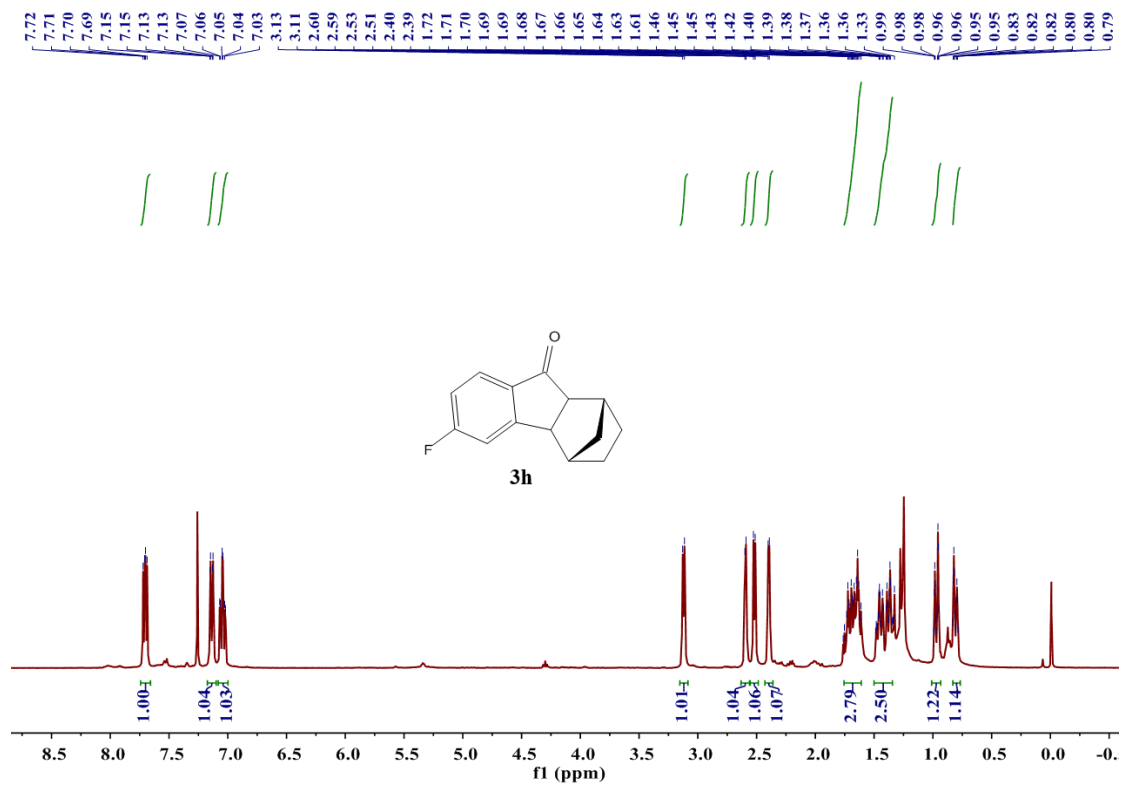

<sup>1</sup>H NMR for compound **3h**

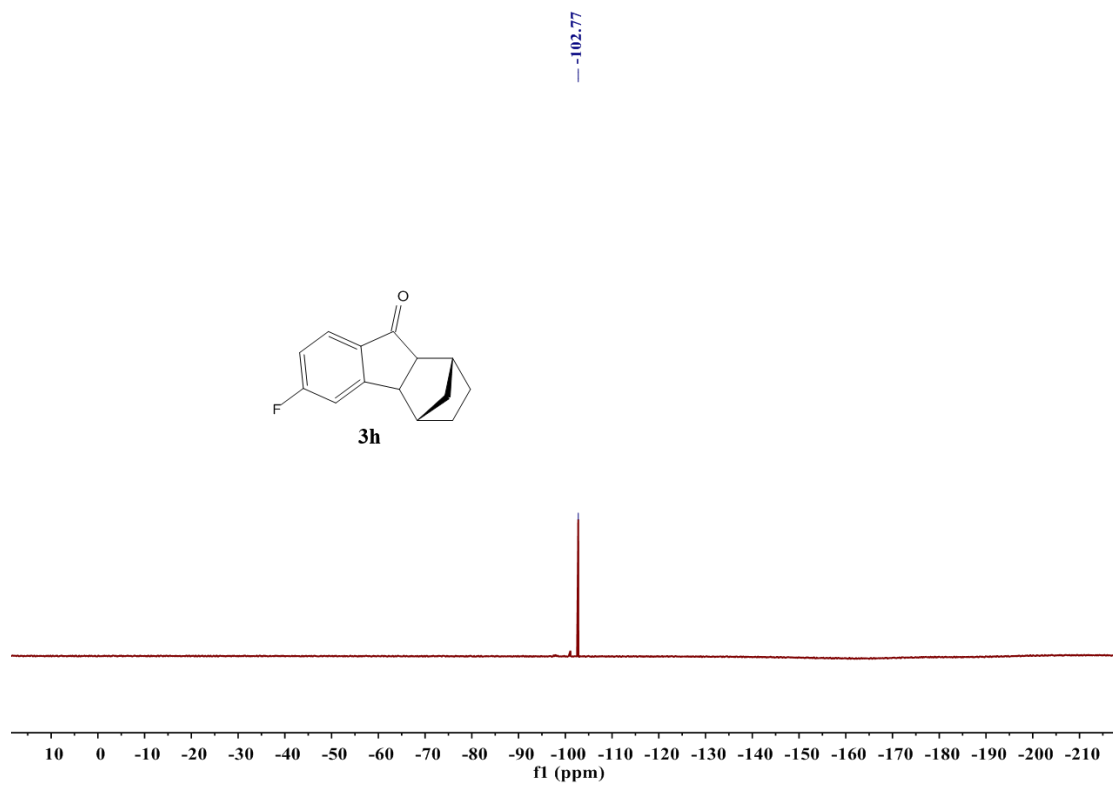

<sup>19</sup>F NMR for compound **3h**

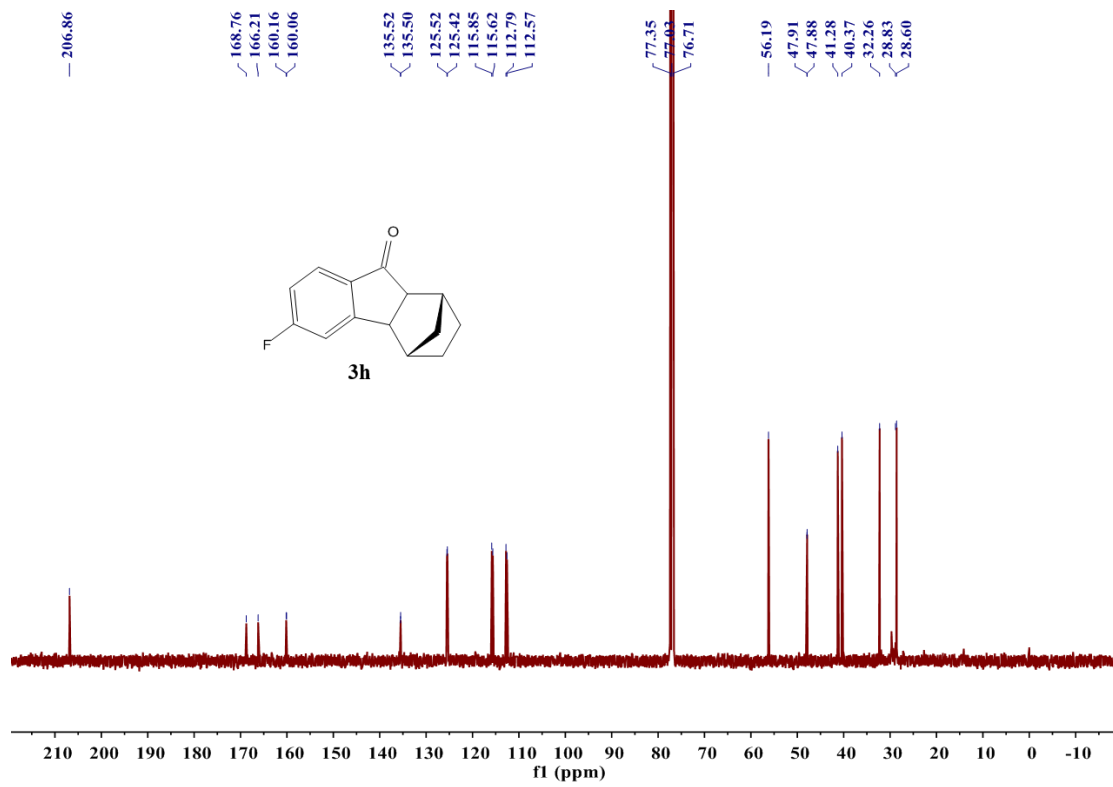

<sup>13</sup>C NMR for compound **3h**

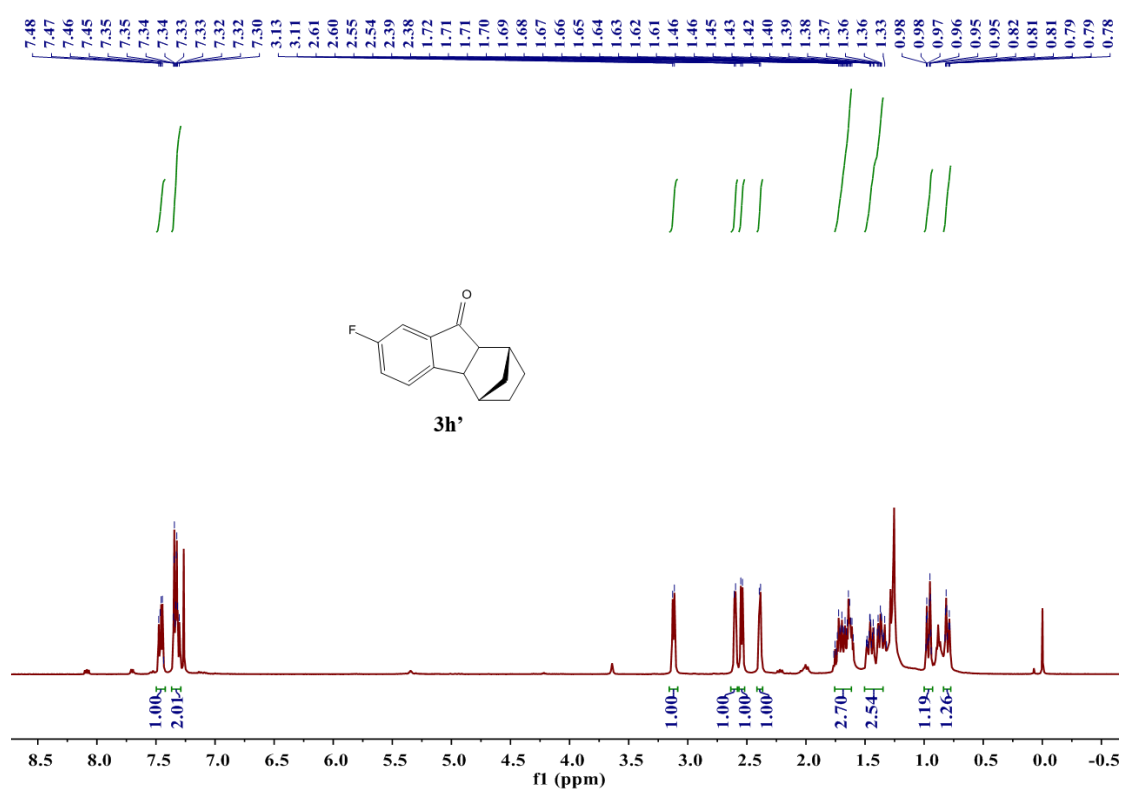

<sup>1</sup>H NMR for compound **3h'**

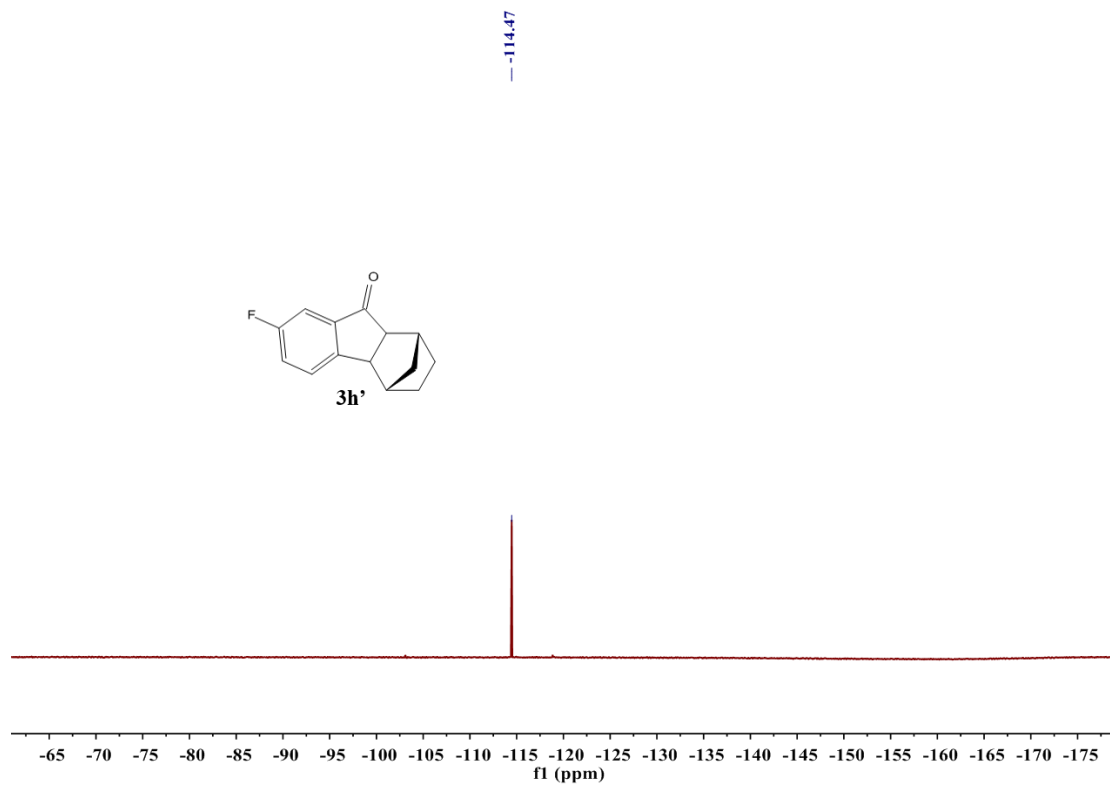

$^{19}\text{F}$  NMR for compound **3h'**

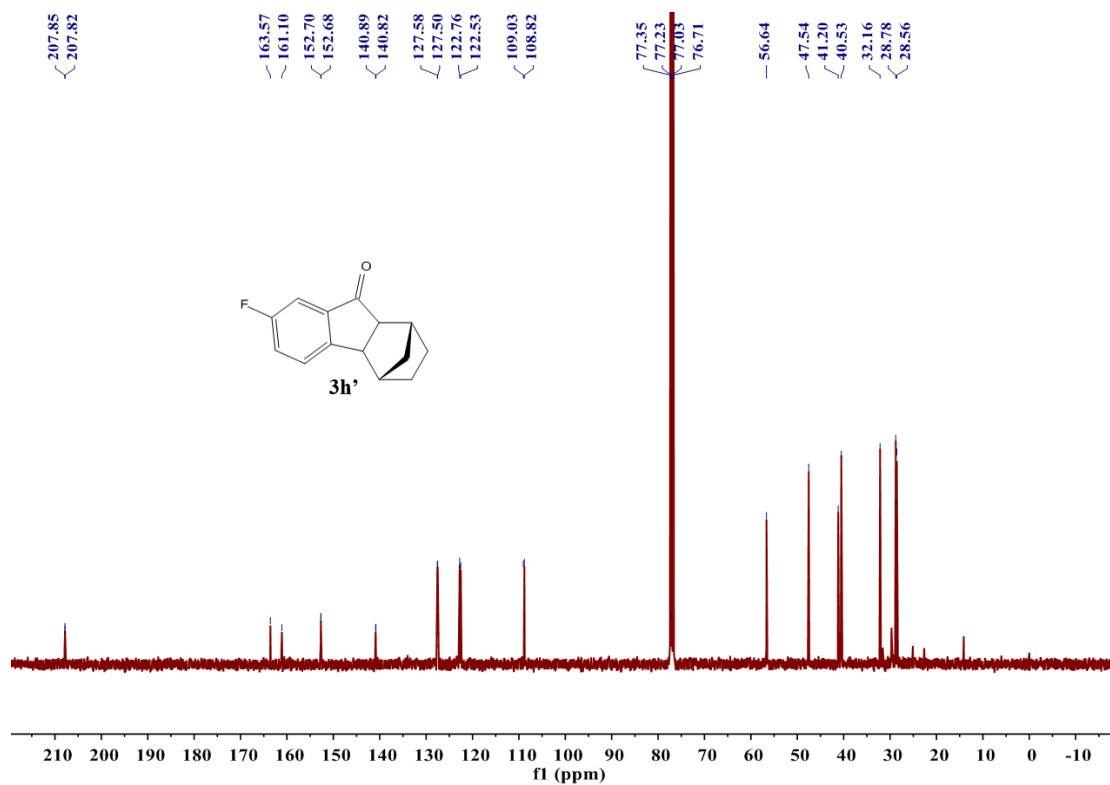

$^{13}\text{C}$  NMR for compound **3h'**

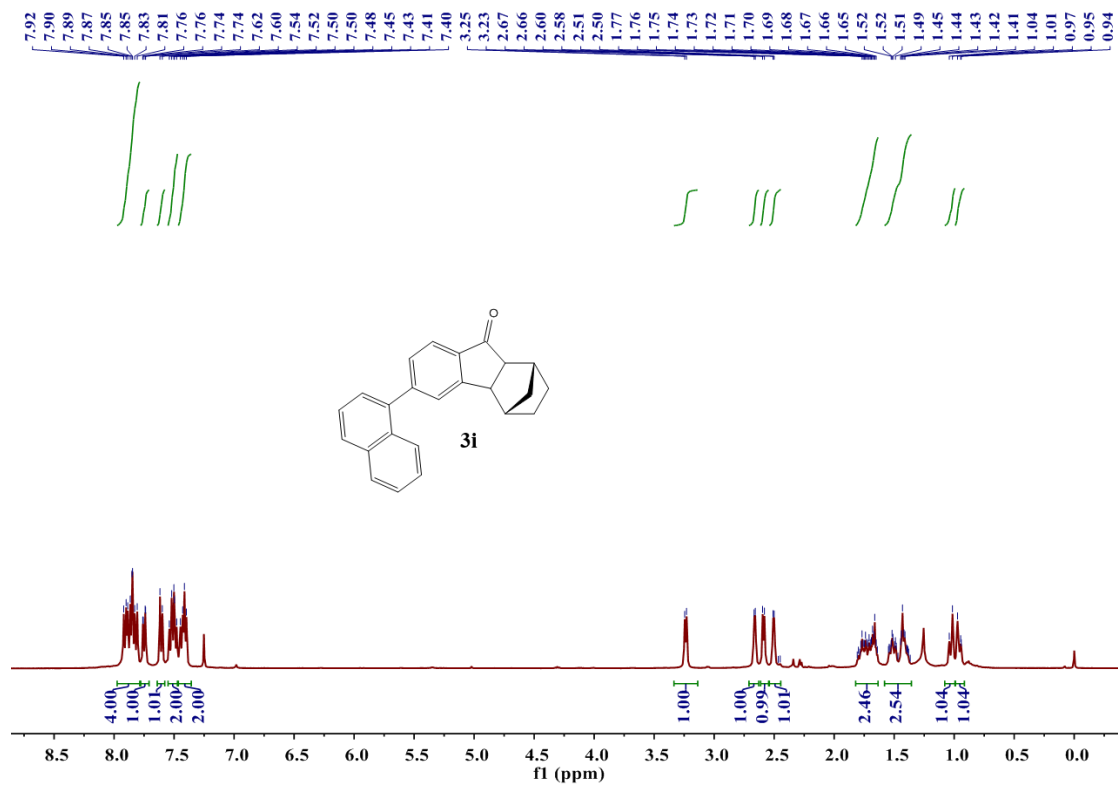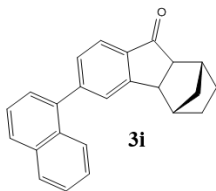

<sup>1</sup>H NMR for compound **3i**

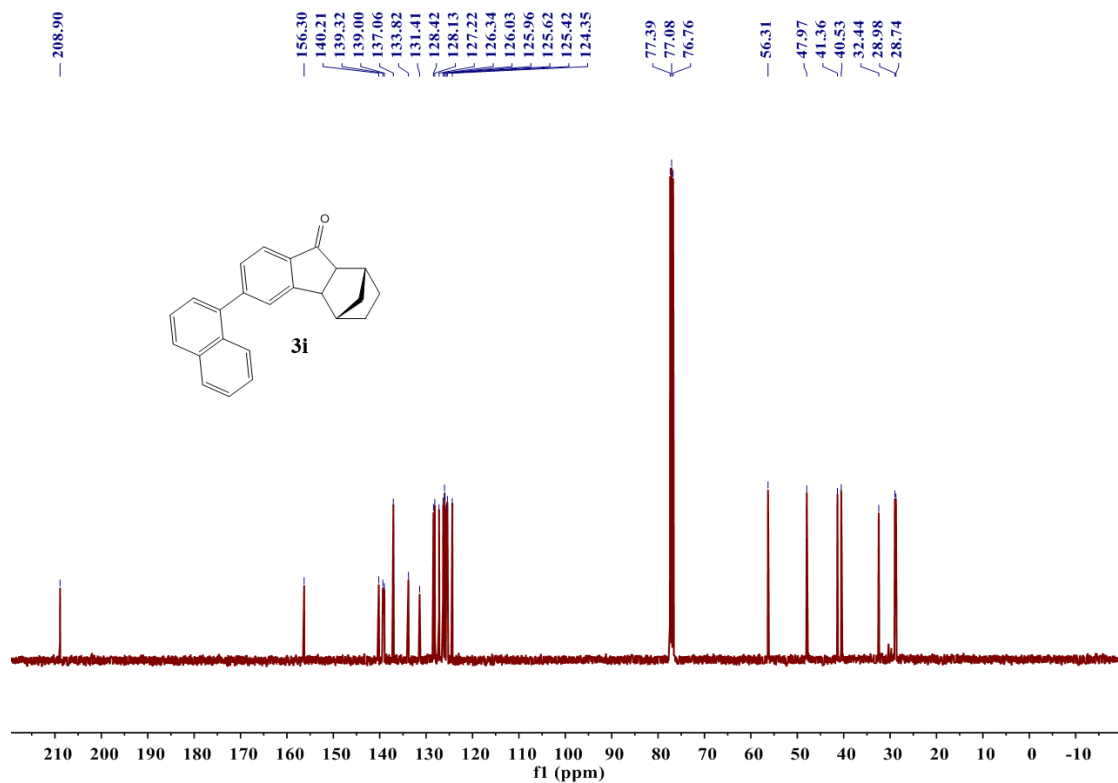

<sup>13</sup>C NMR for compound **3i**

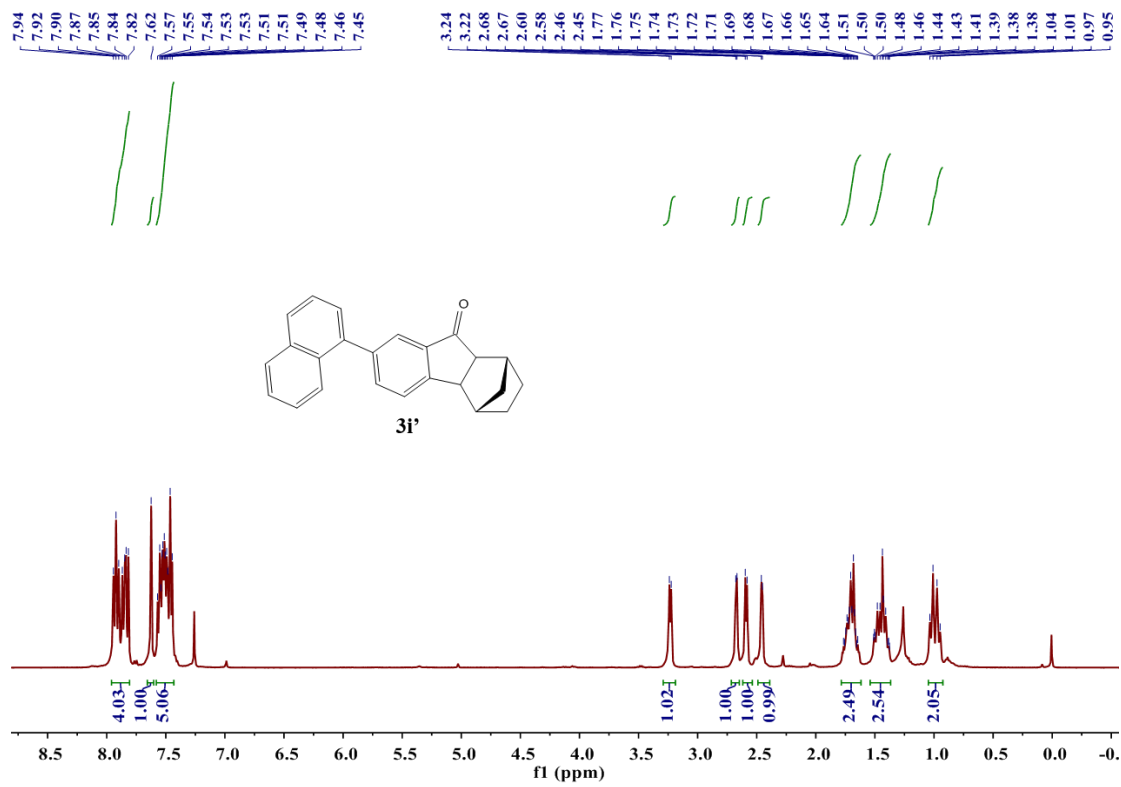

<sup>1</sup>H NMR for compound 3i'

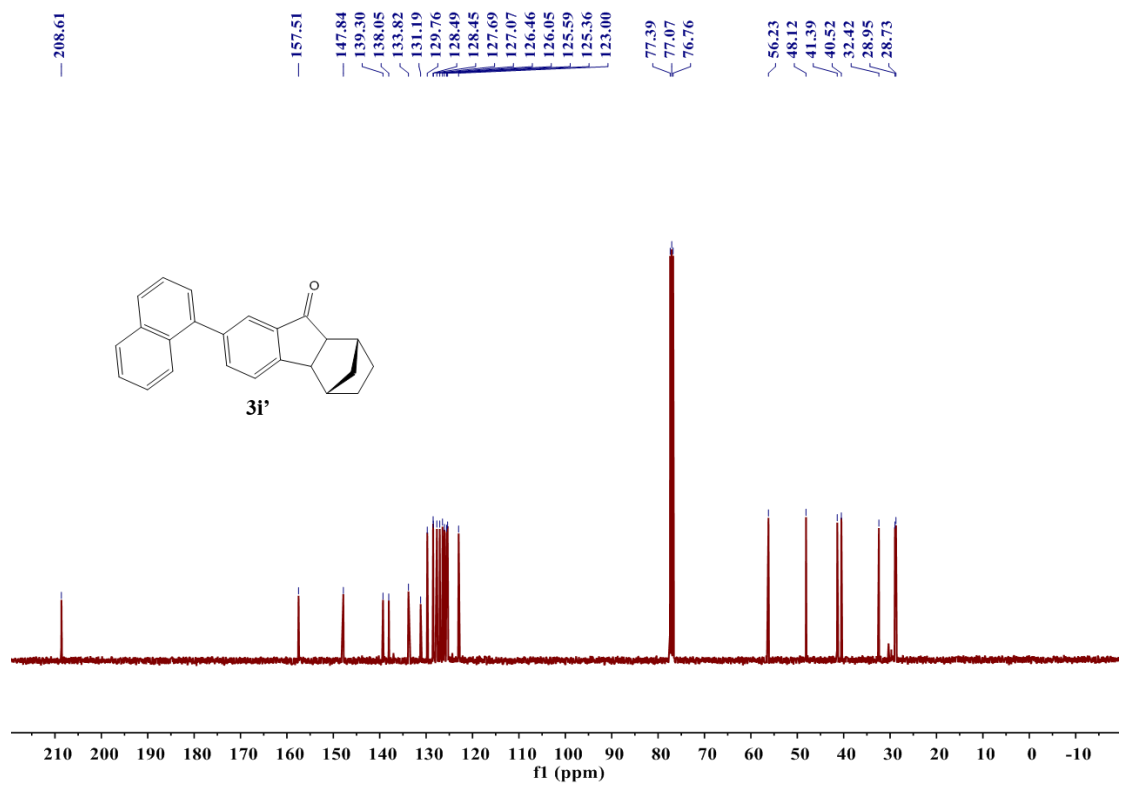

<sup>13</sup>C NMR for compound 3i'

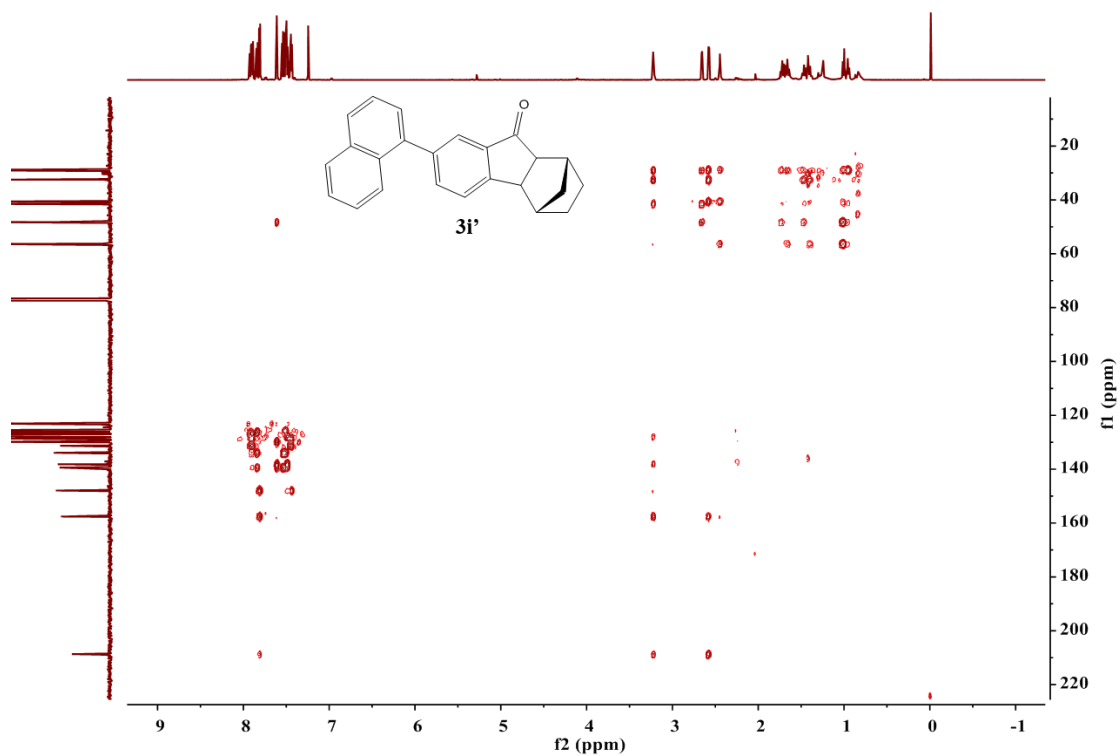

The HMBC spectrum of the compound **3i'** in CDCl<sub>3</sub>.

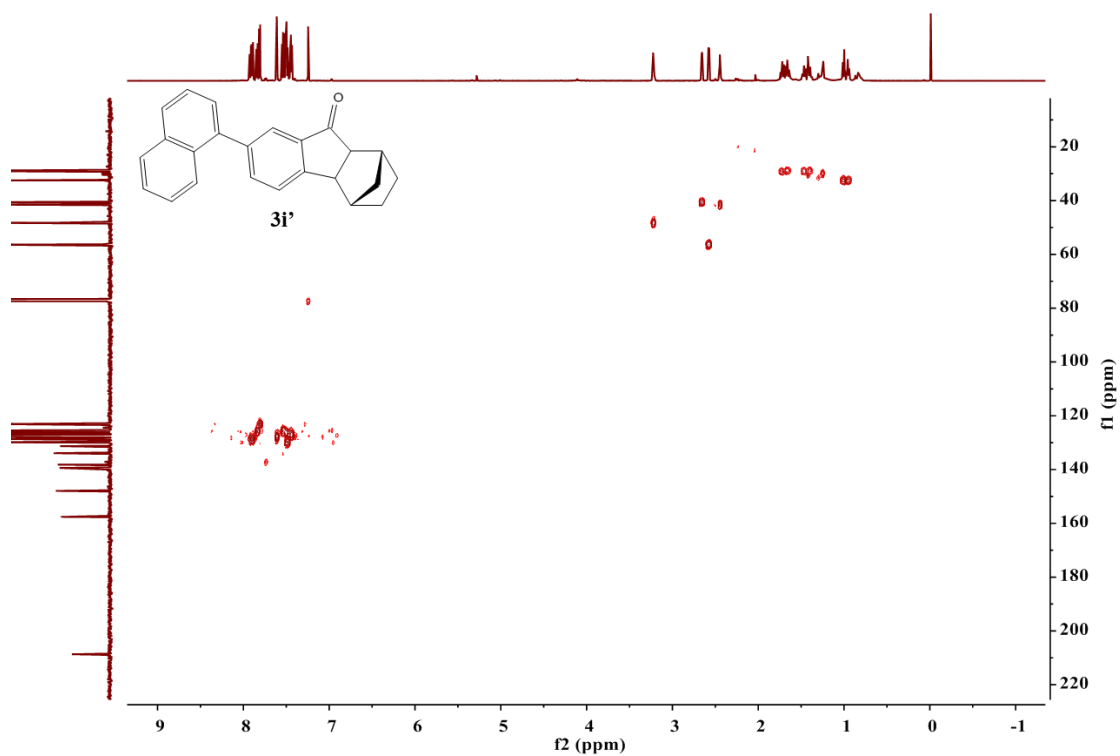

The HMQC spectrum of the compound **3i'** in CDCl<sub>3</sub>.

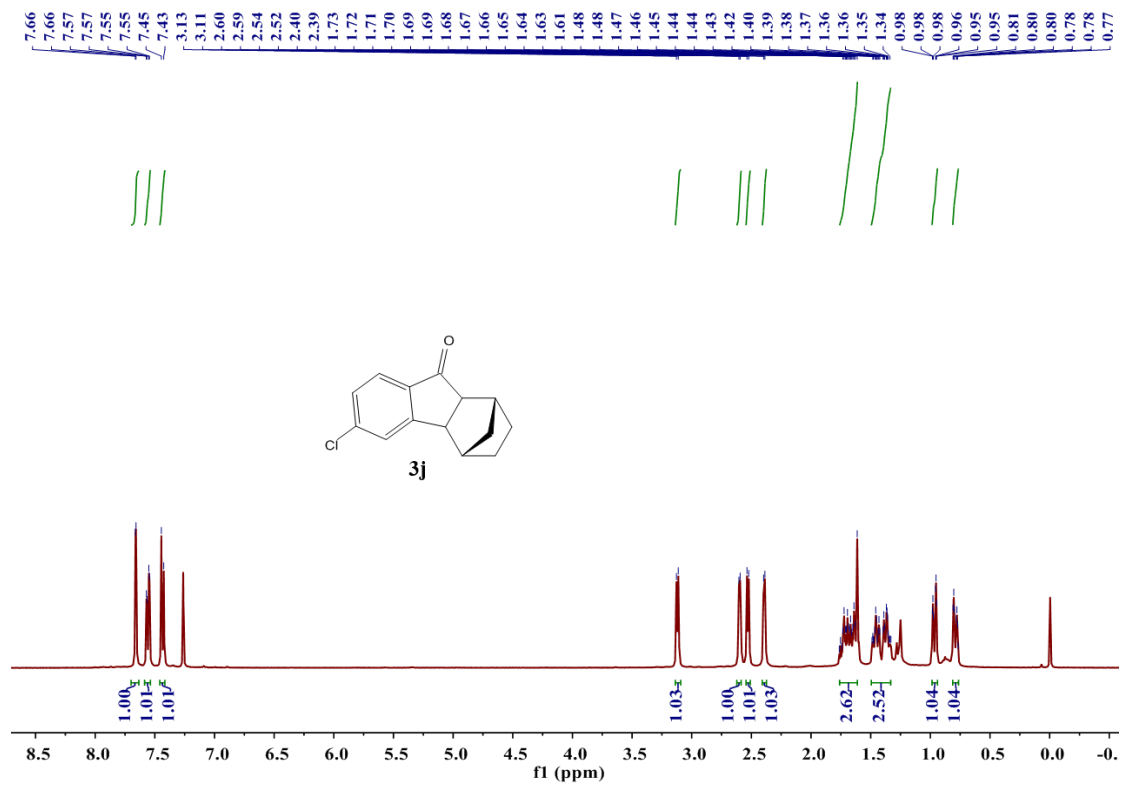

<sup>1</sup>H NMR for compound **3j**

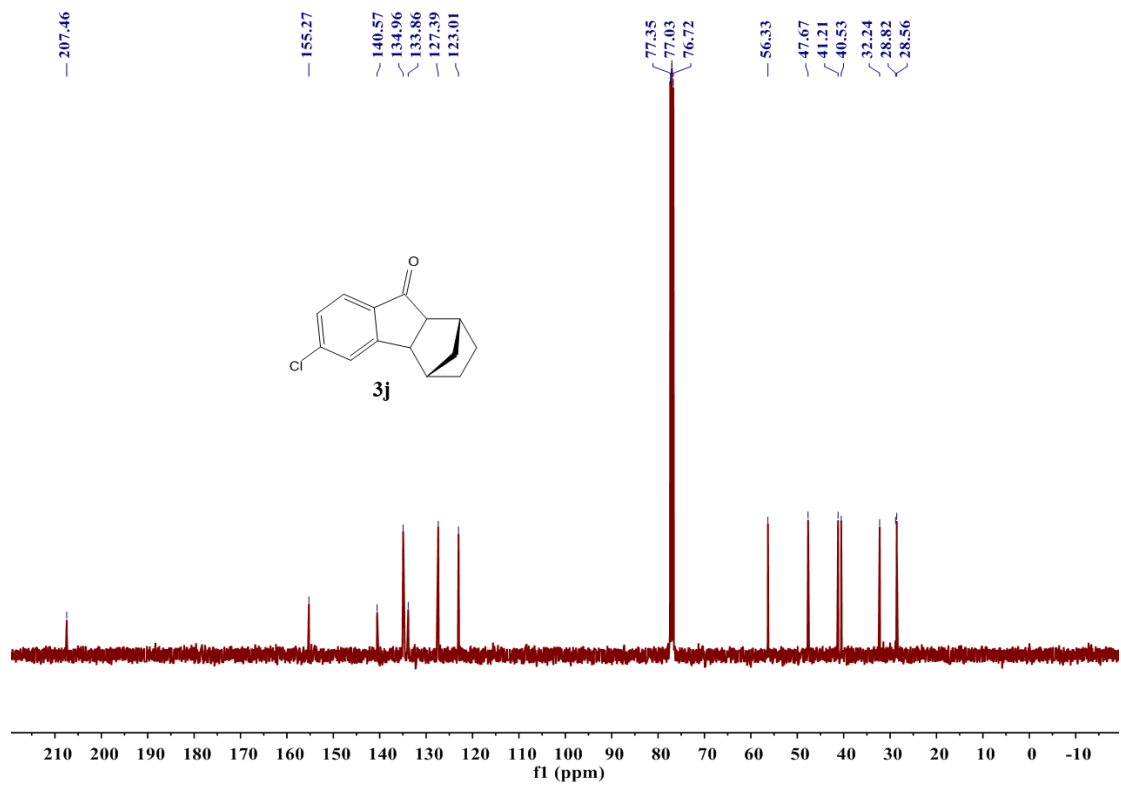

<sup>13</sup>C NMR for compound **3j**

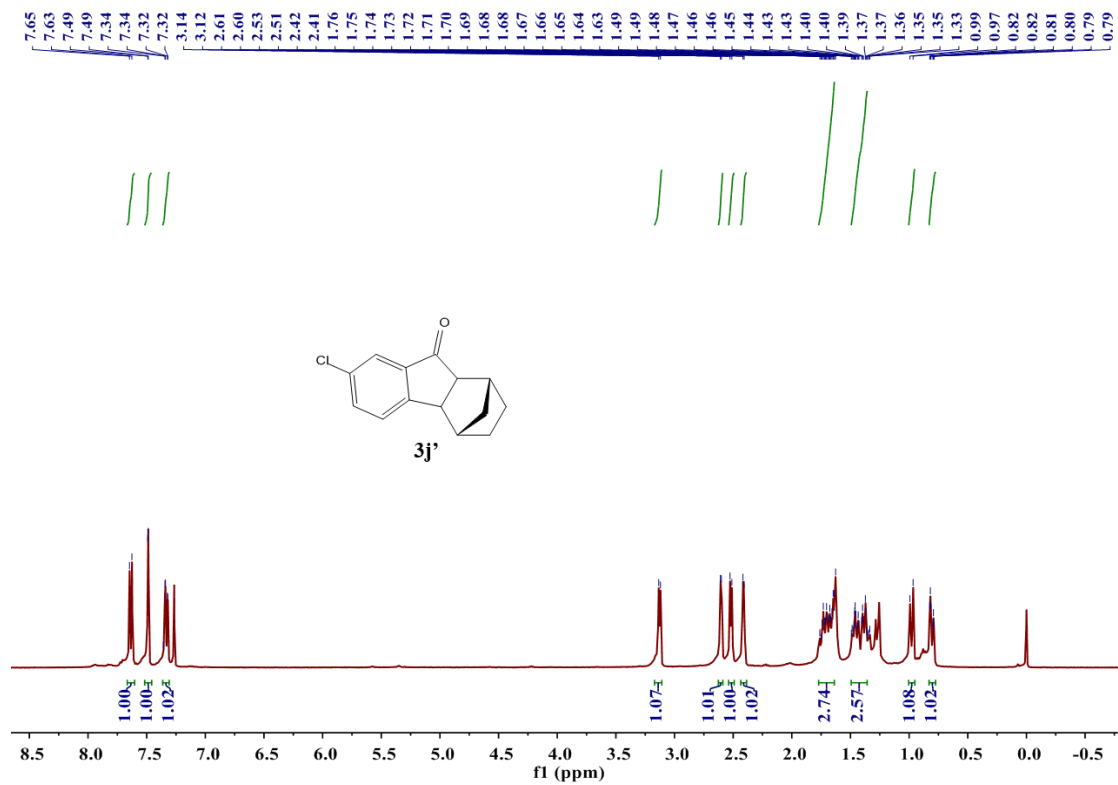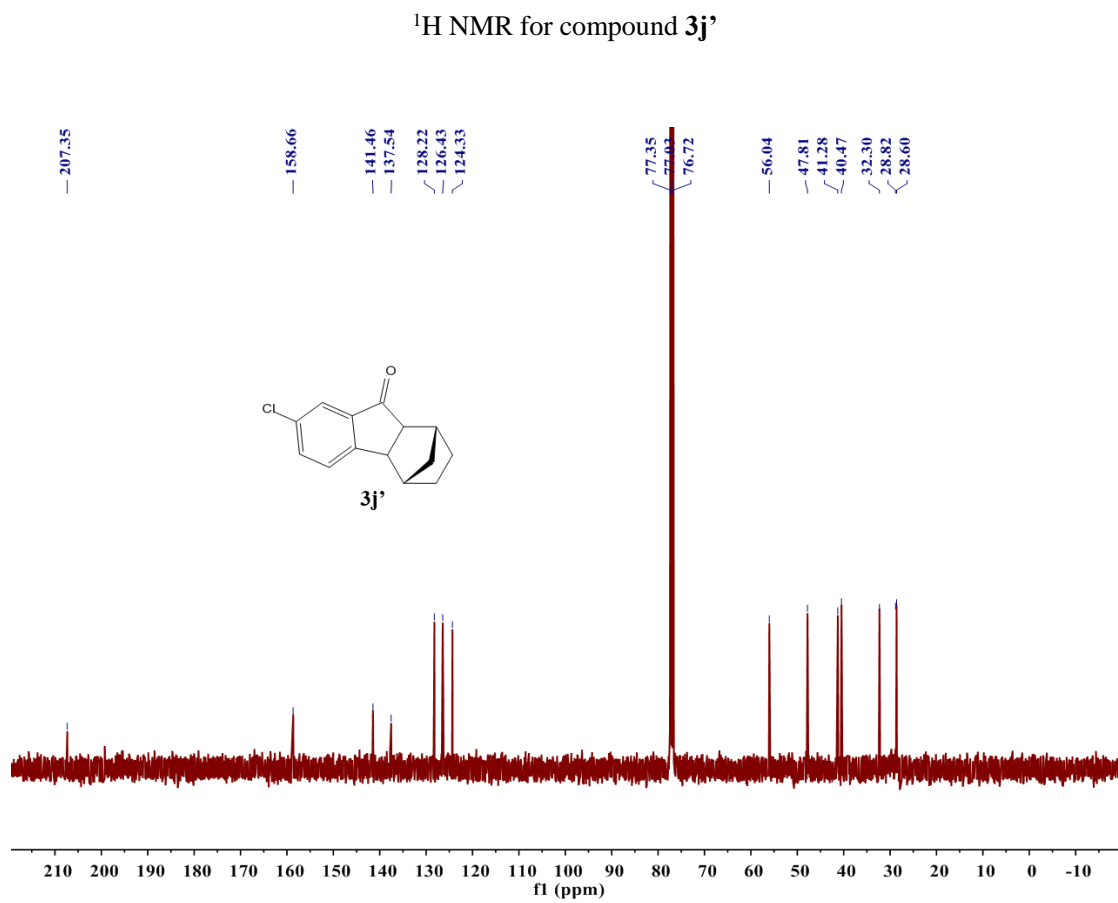



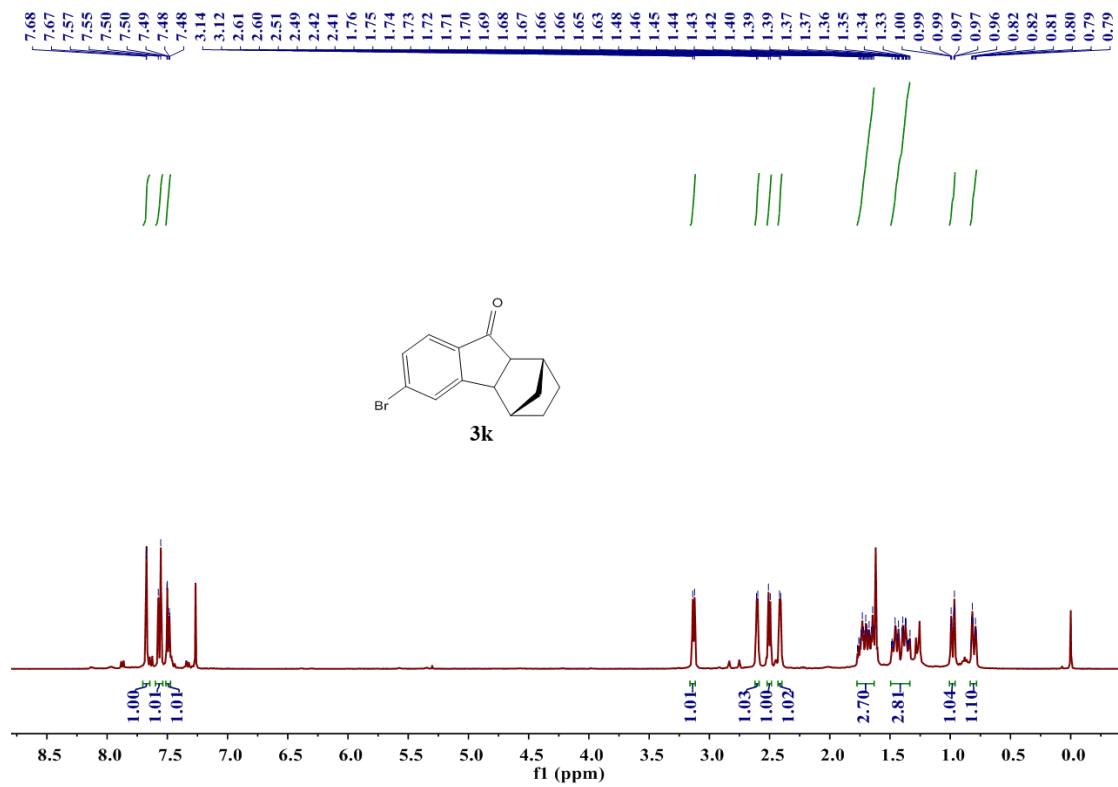

<sup>1</sup>H NMR for compound **3k**

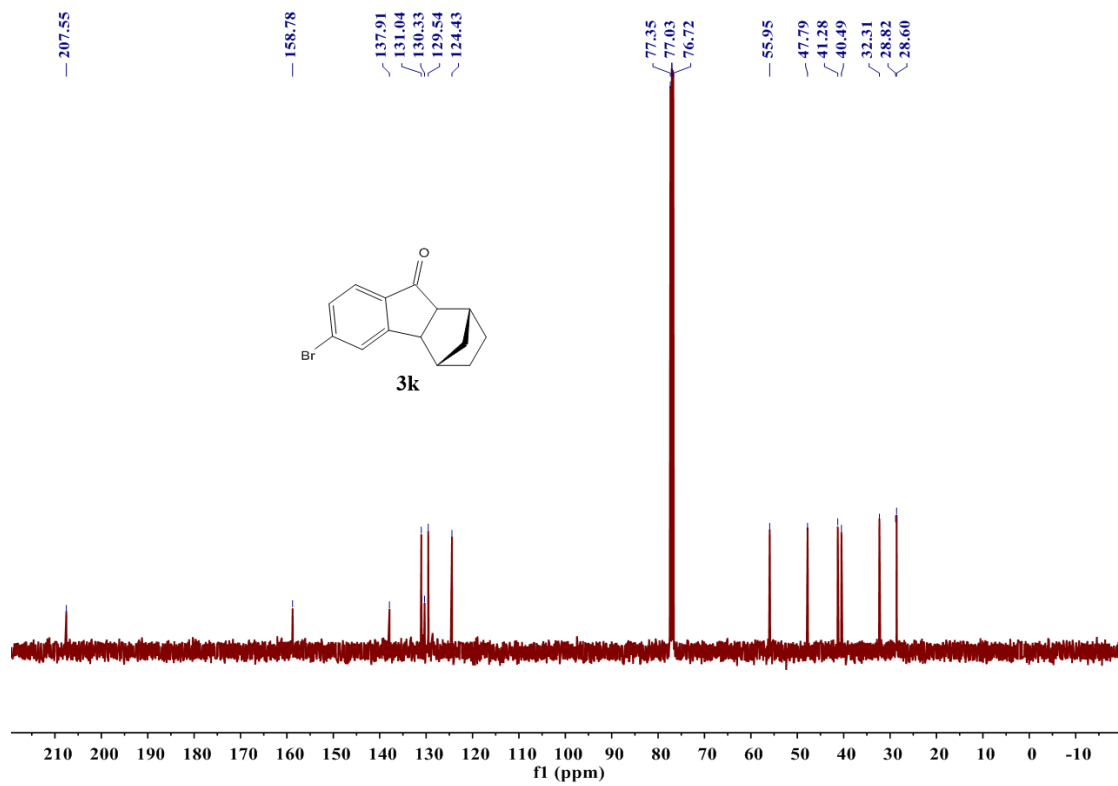

<sup>13</sup>C NMR for compound **3k**

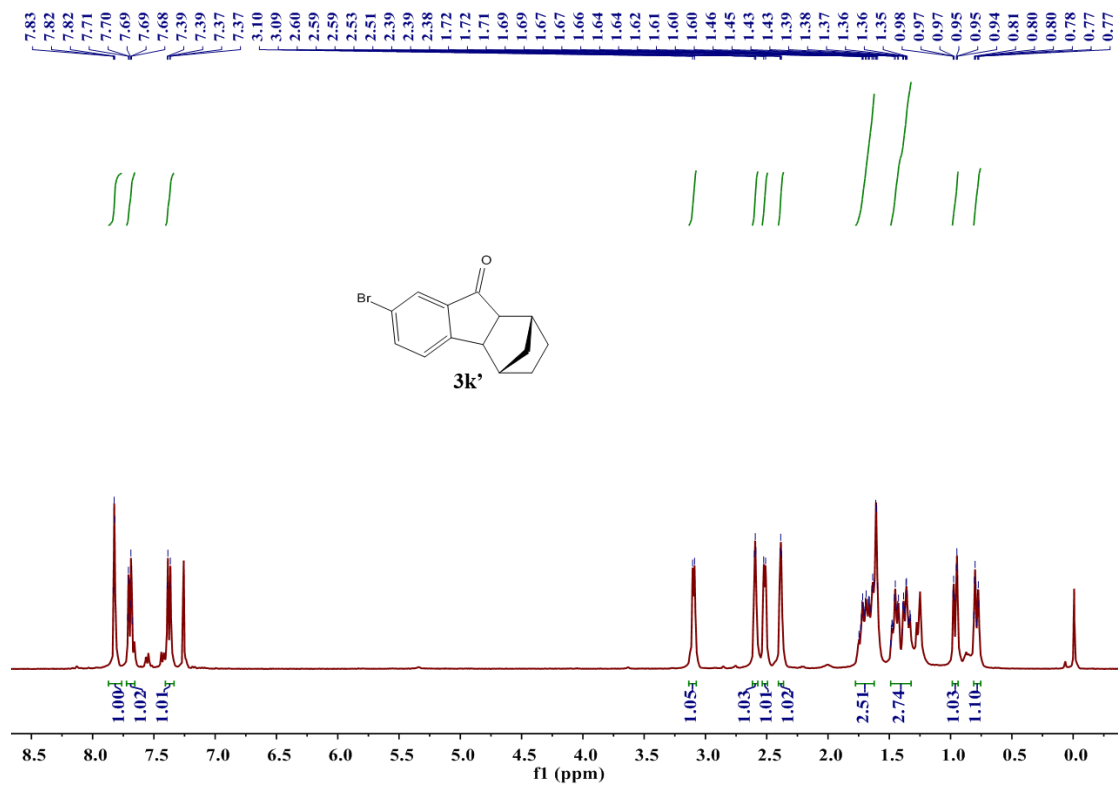

<sup>1</sup>H NMR for compound **3k'**

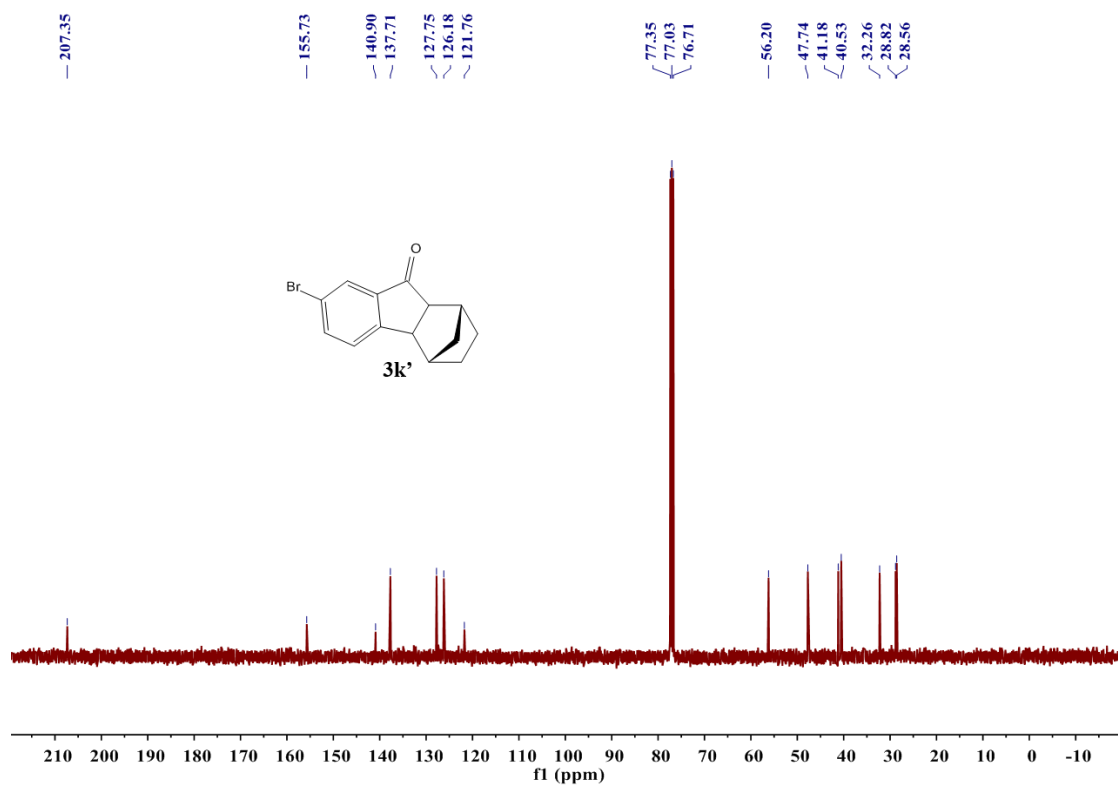

<sup>13</sup>C NMR for compound **3k'**

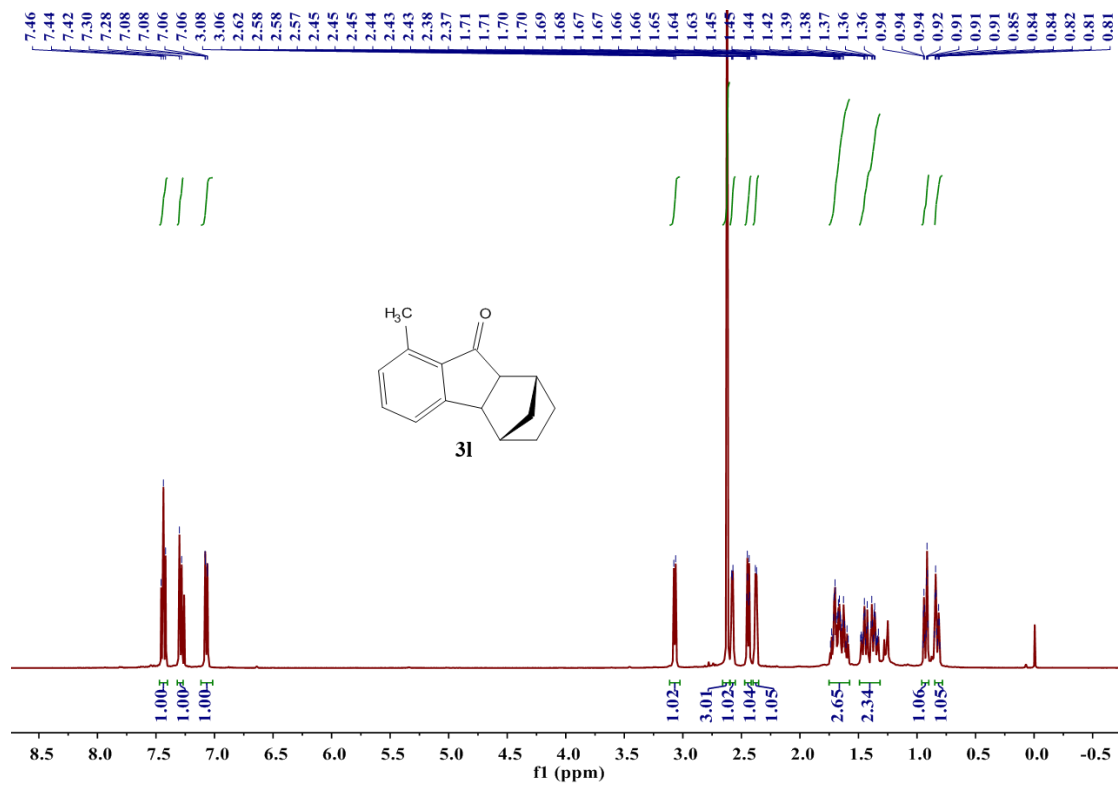

<sup>1</sup>H NMR for compound 31

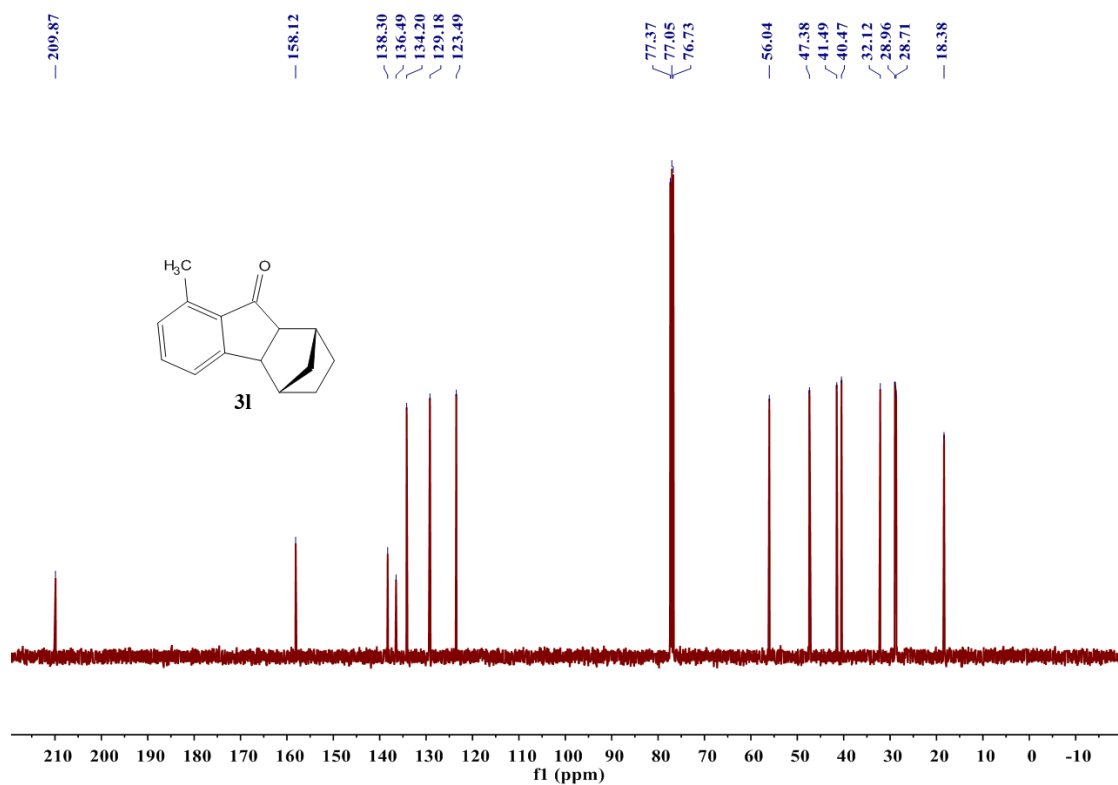

<sup>13</sup>C NMR for compound 31

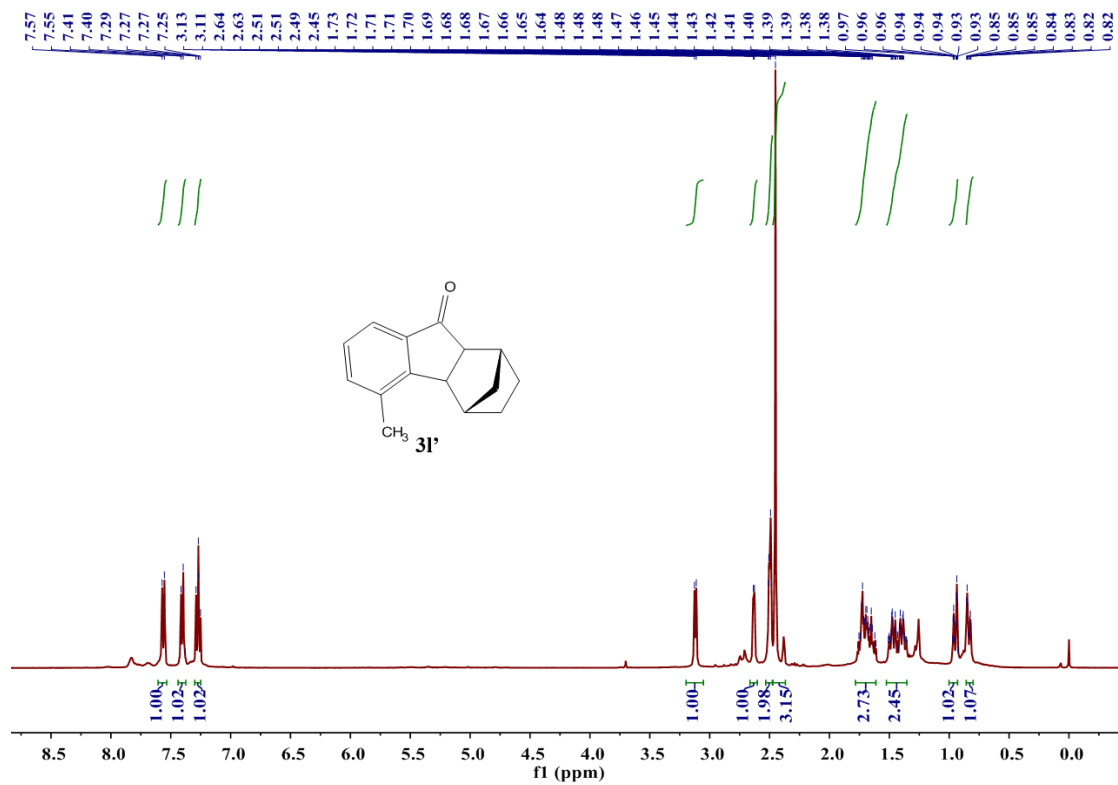

**<sup>1</sup>H NMR for compound 31'**

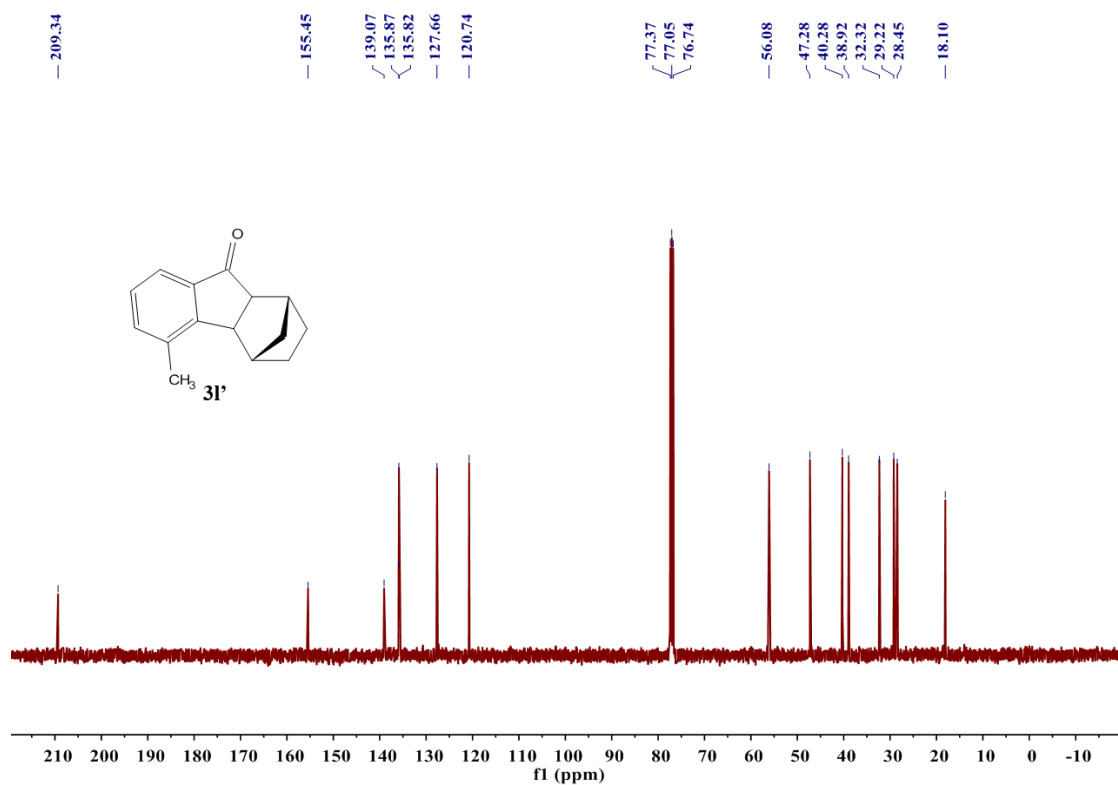

**<sup>13</sup>C NMR for compound 31'**

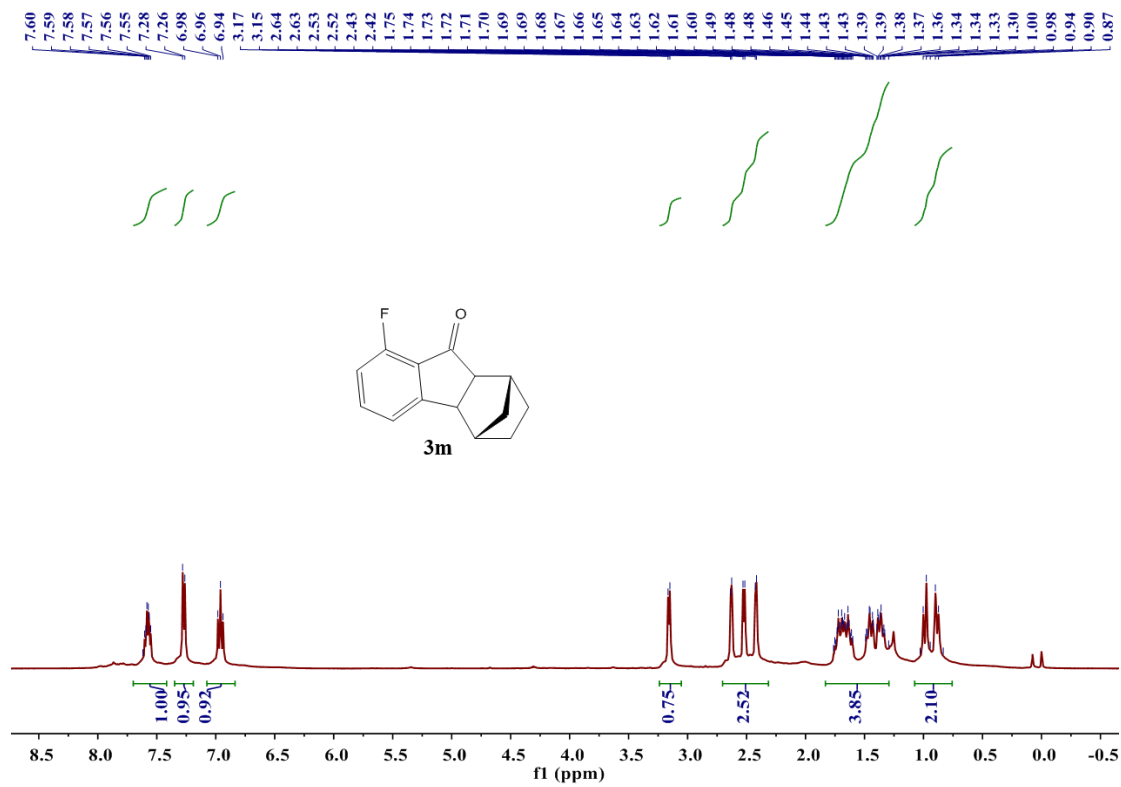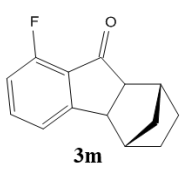

<sup>1</sup>H NMR for compound **3m**

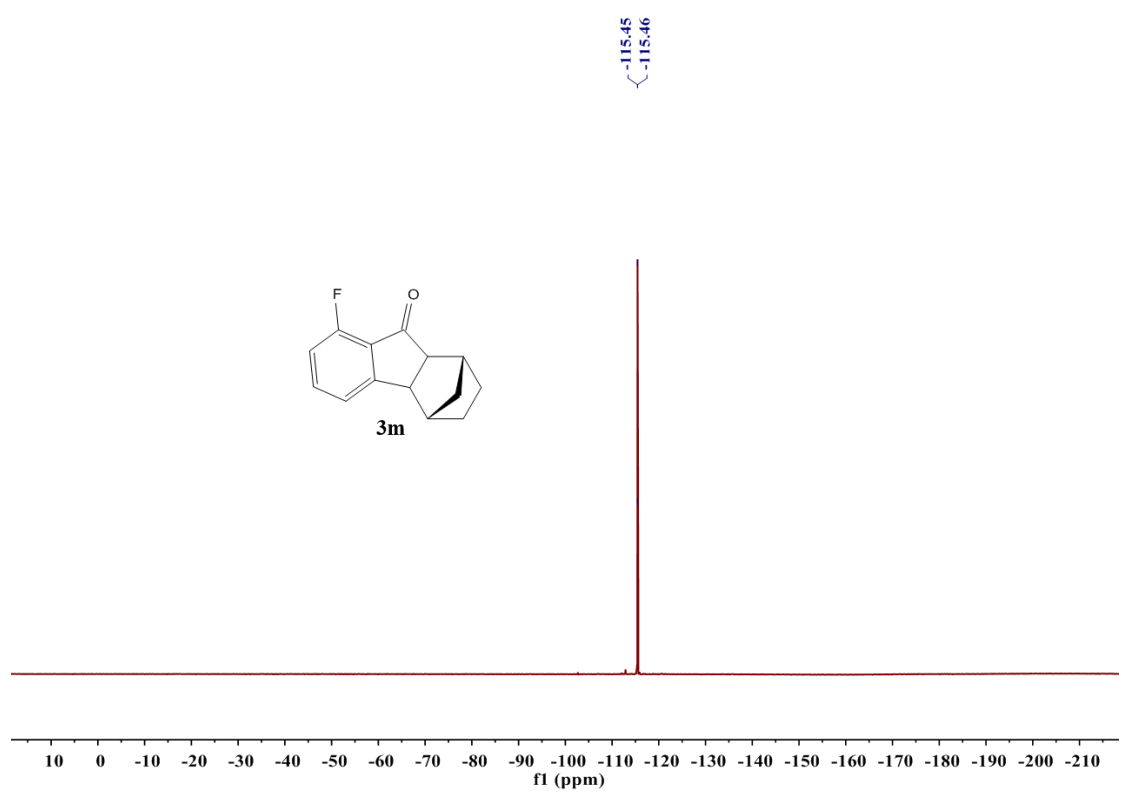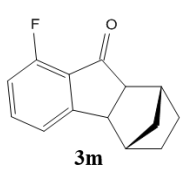

<sup>19</sup>F NMR for compound **3m**

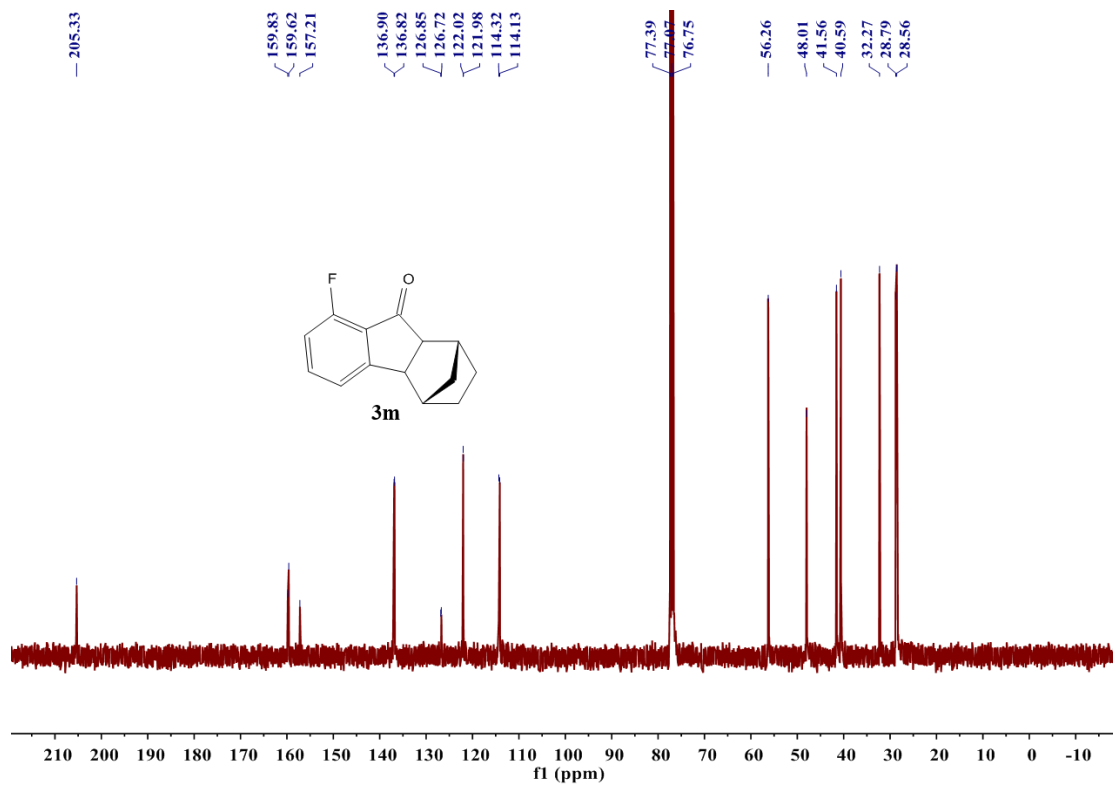

<sup>13</sup>C NMR for compound **3m**

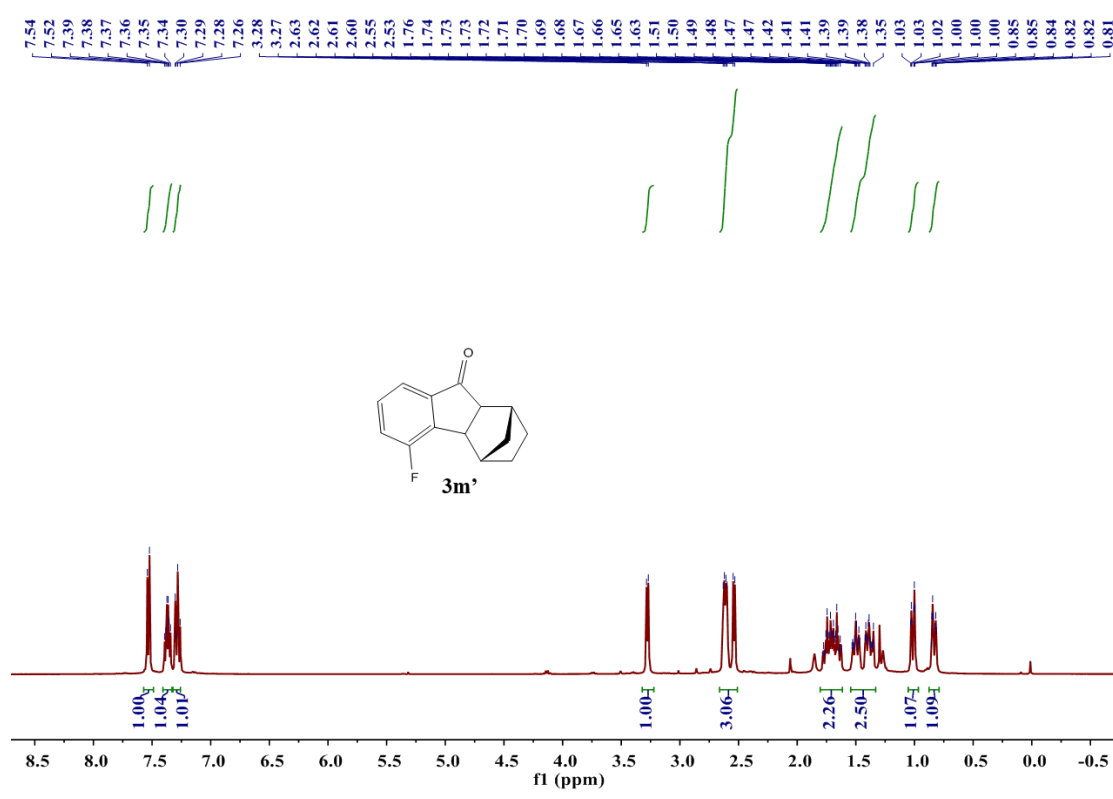

<sup>1</sup>H NMR for compound **3m'**

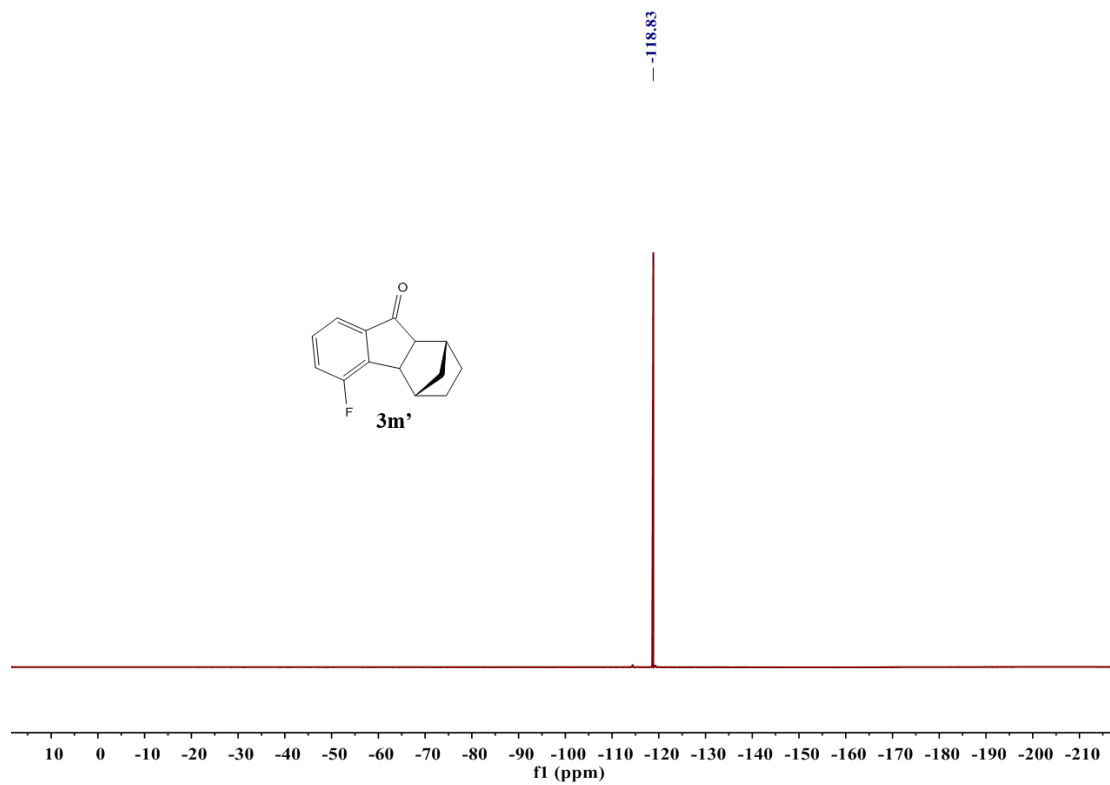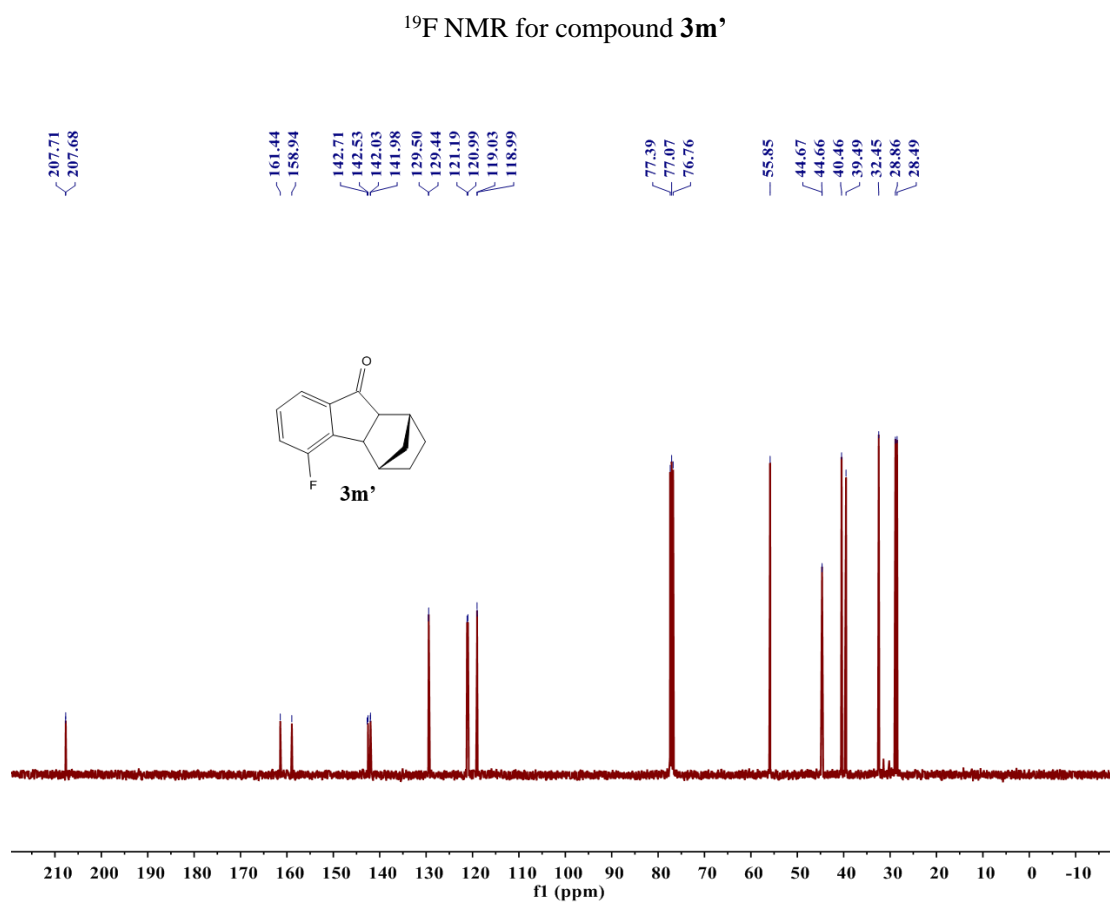

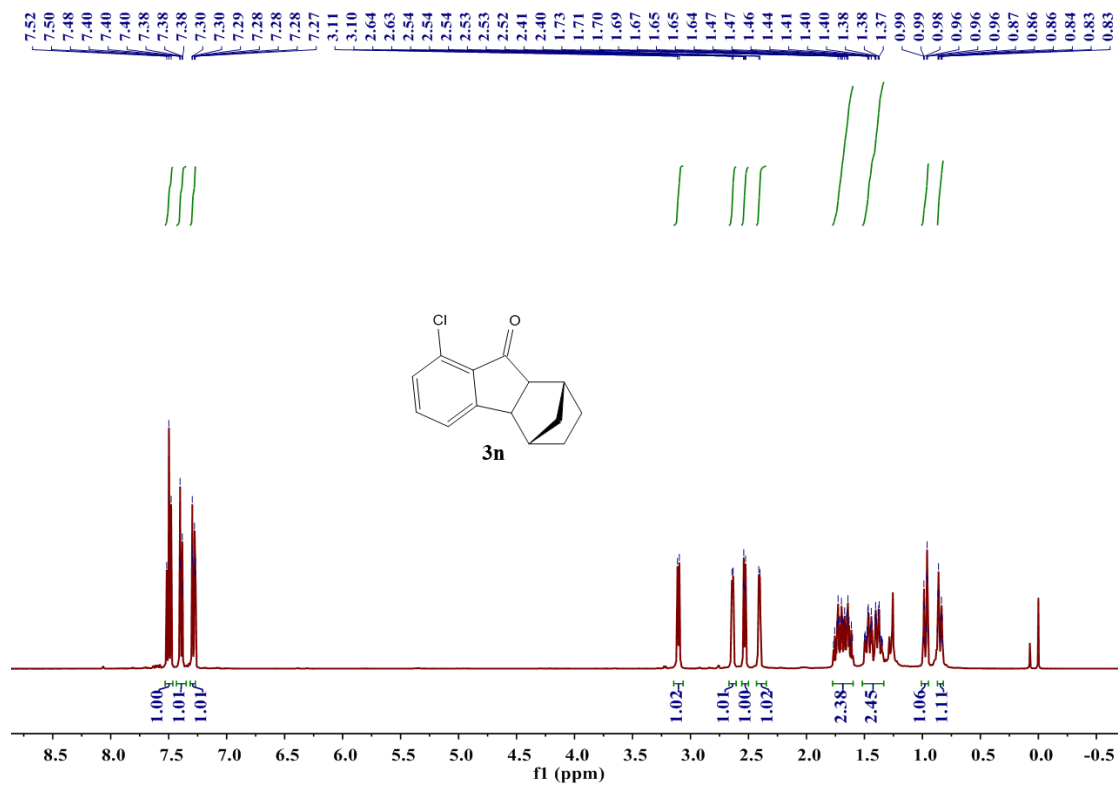

**<sup>1</sup>H NMR for compound 3n**

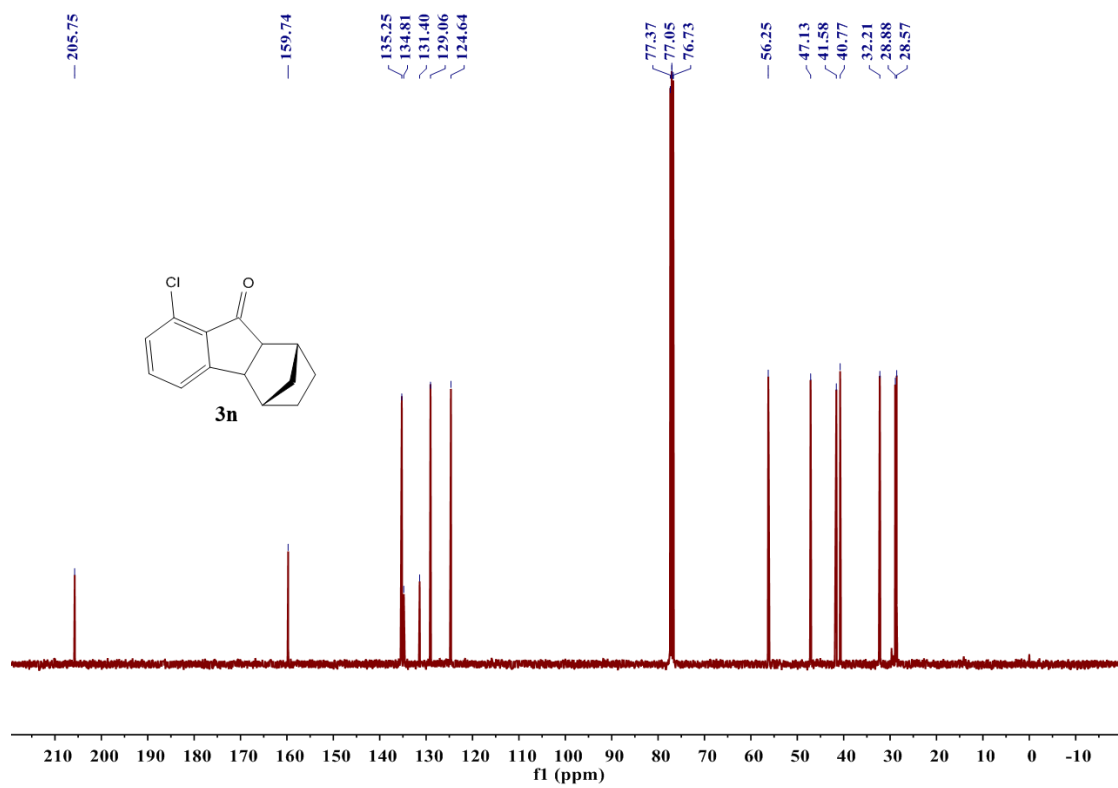

**<sup>13</sup>C NMR for compound 3n**



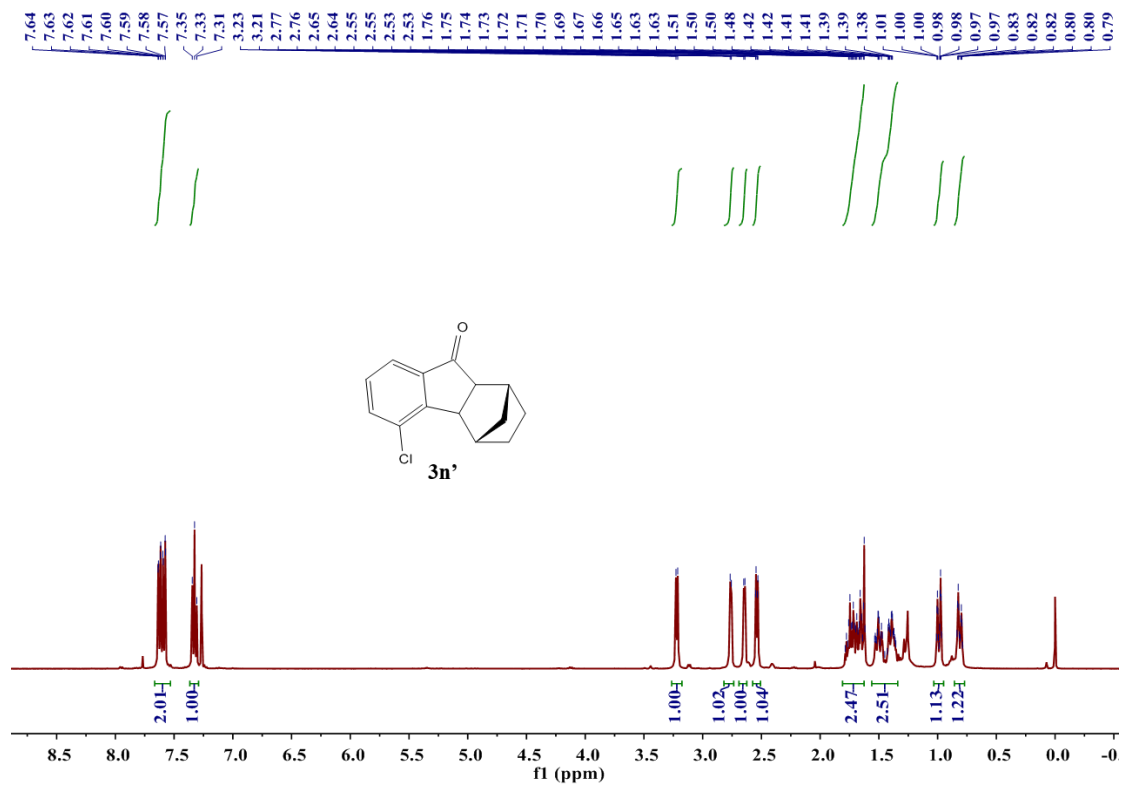

<sup>1</sup>H NMR for compound 3n'

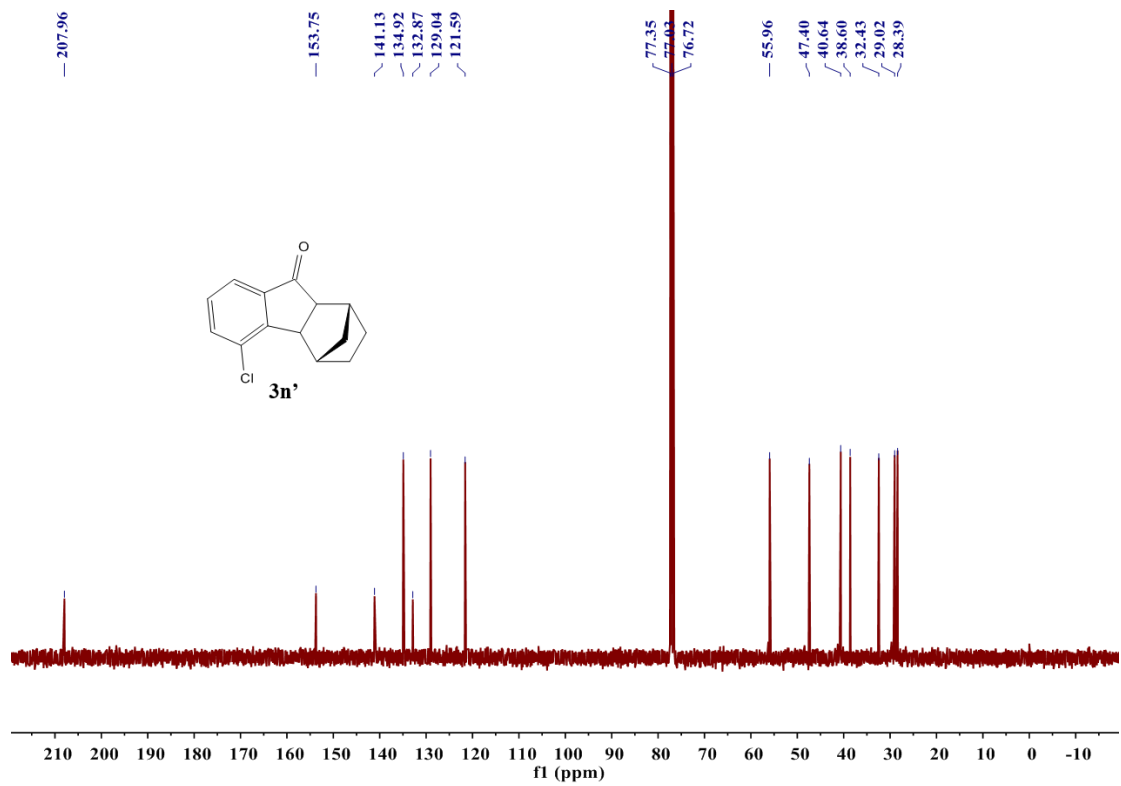

<sup>13</sup>C NMR for compound 3n'

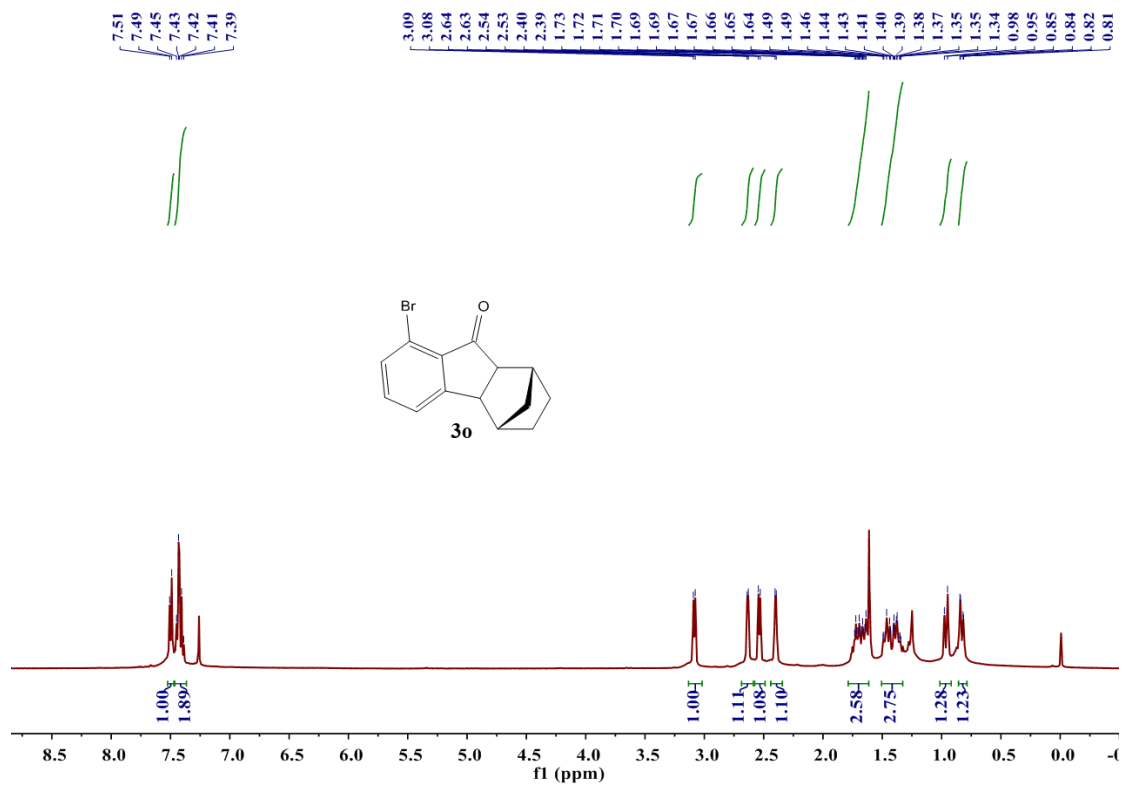

<sup>1</sup>H NMR for compound **3o**

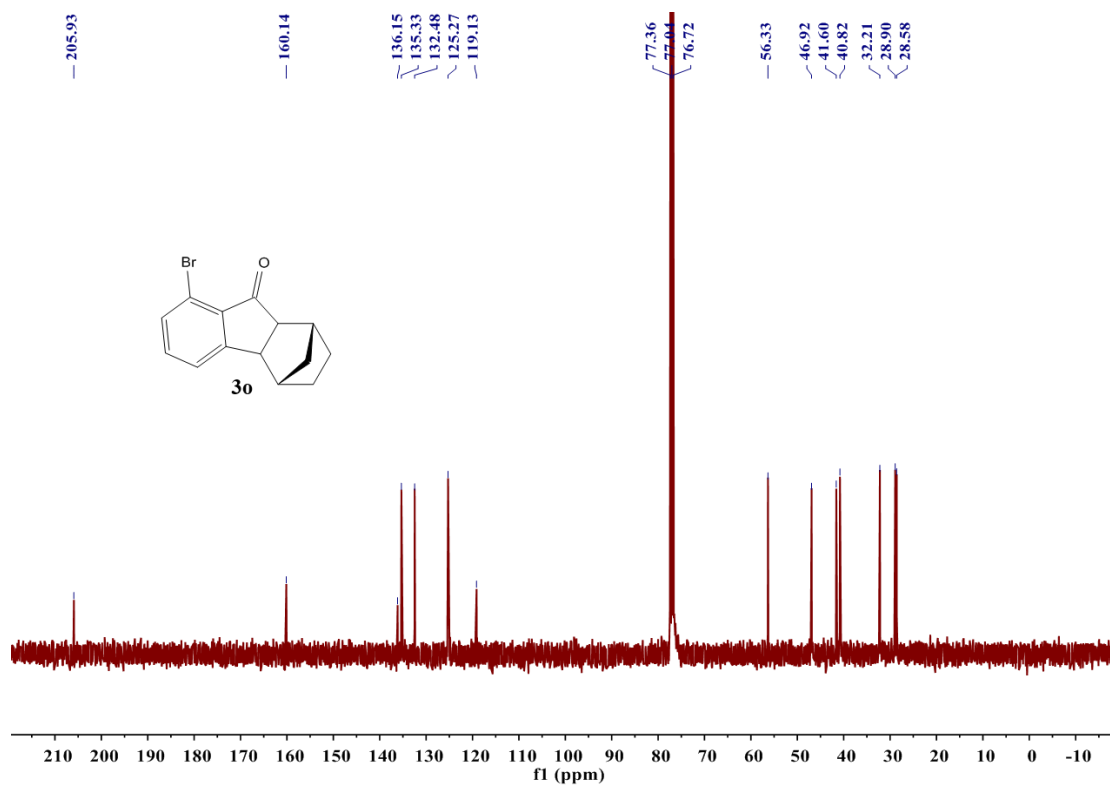

<sup>13</sup>C NMR for compound **3o**

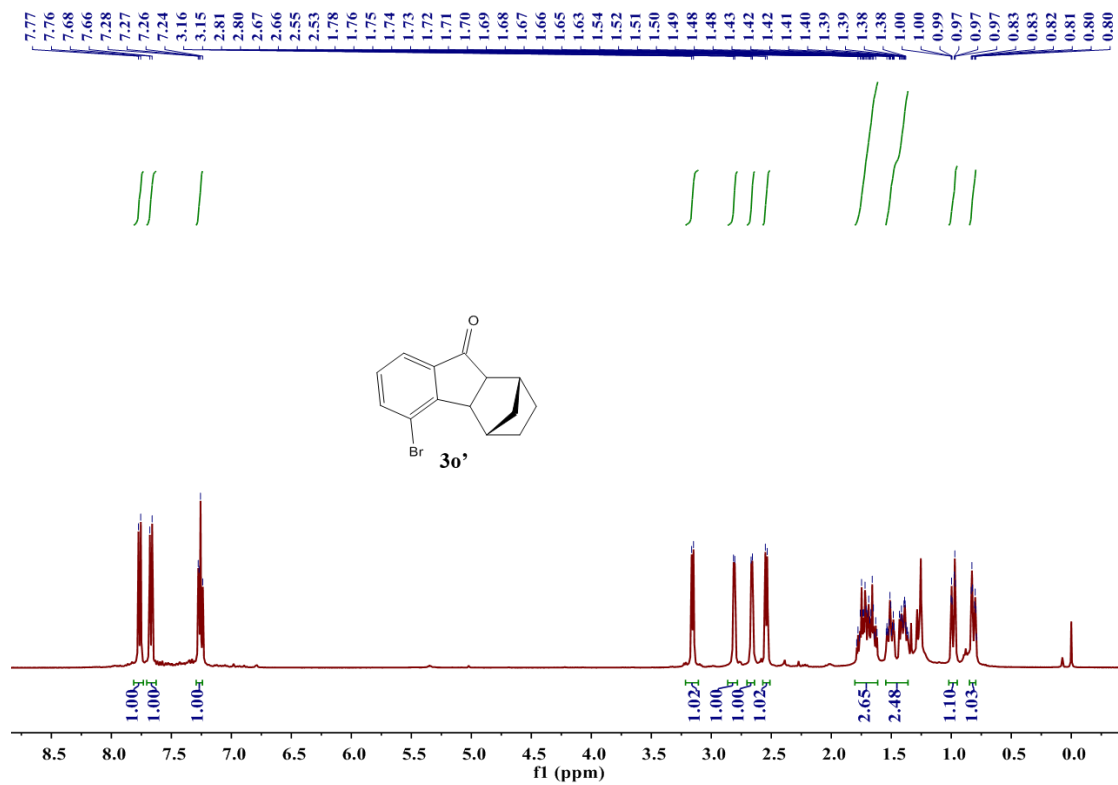

<sup>1</sup>H NMR for compound 30'

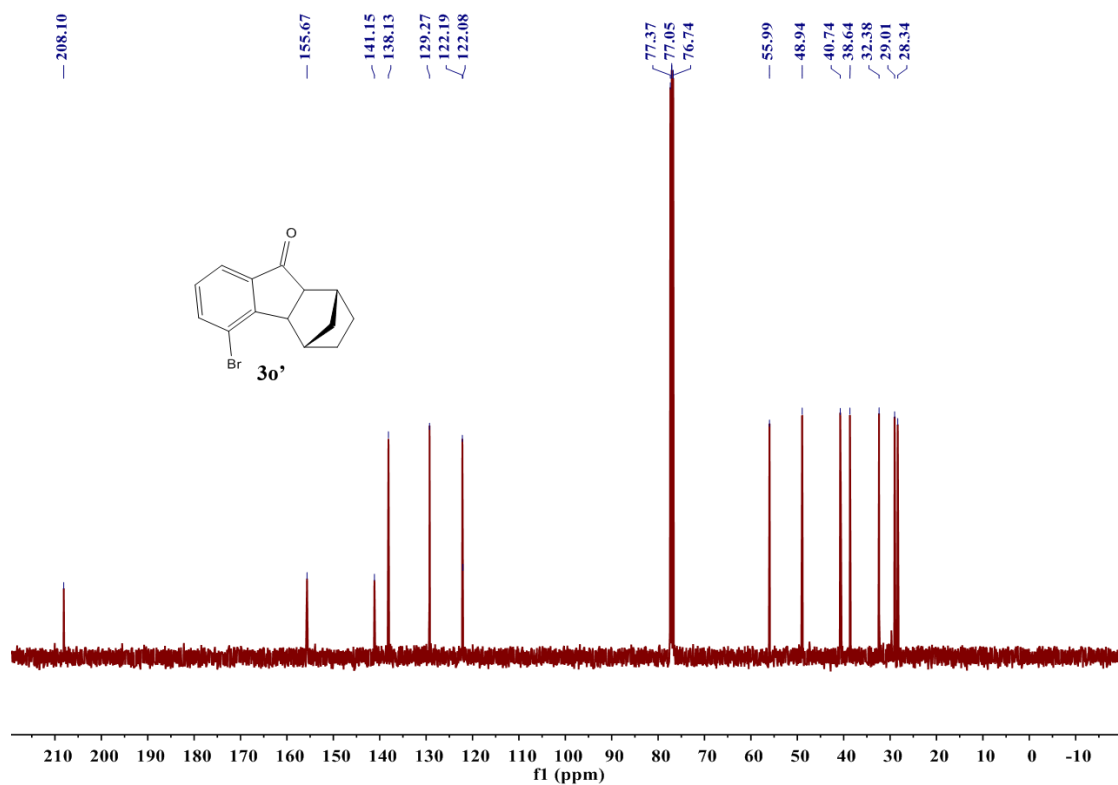

<sup>13</sup>C NMR for compound 30'

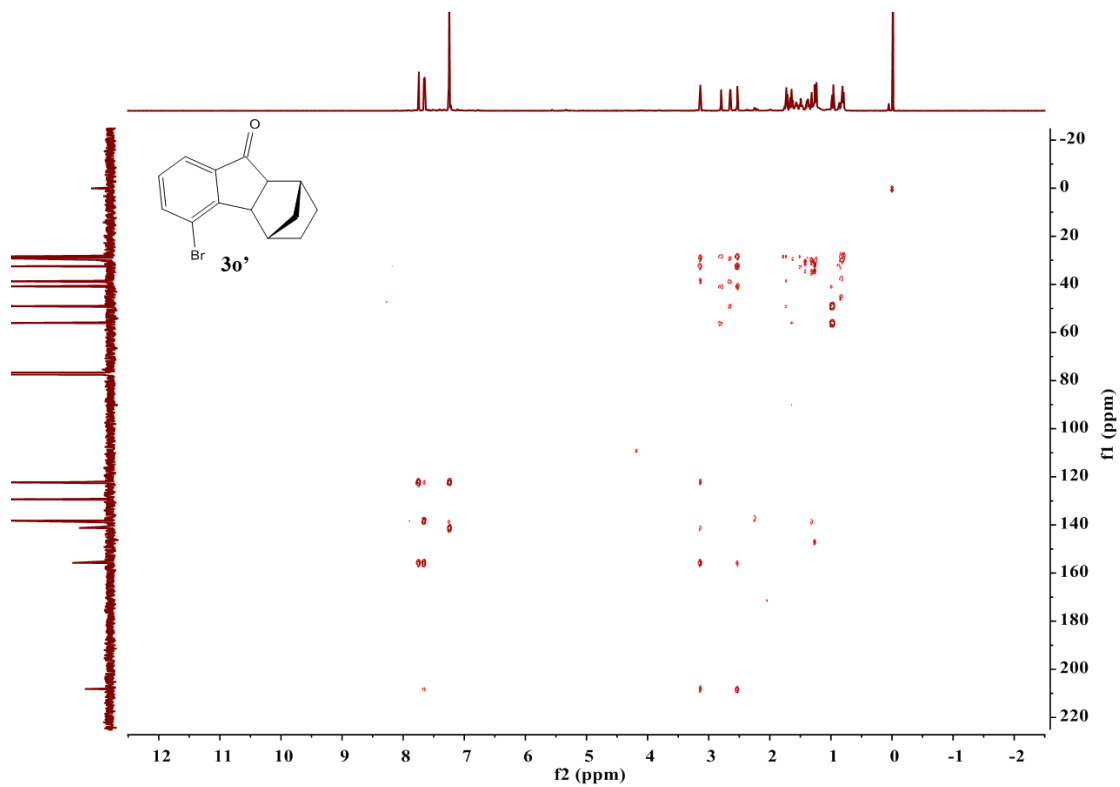

The HMBC spectrum of the compound **30'** in  $\text{CDCl}_3$ .

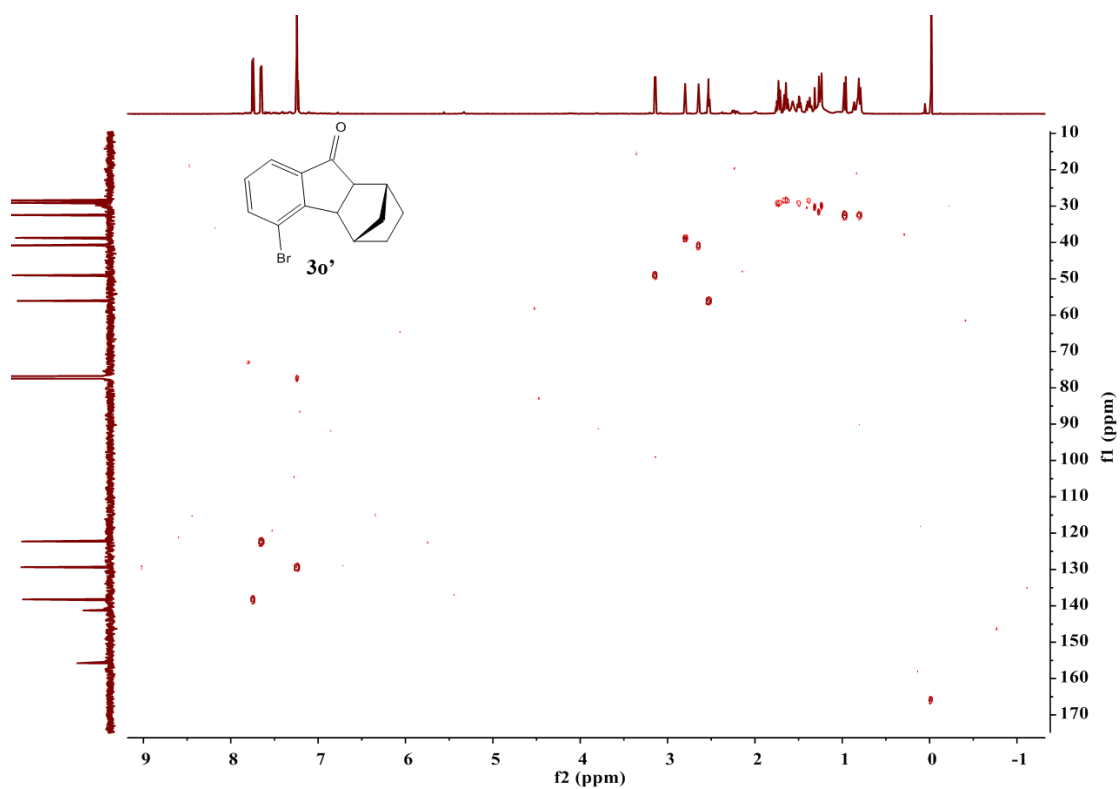

The HMQC spectrum of the compound **30'** in  $\text{CDCl}_3$ .

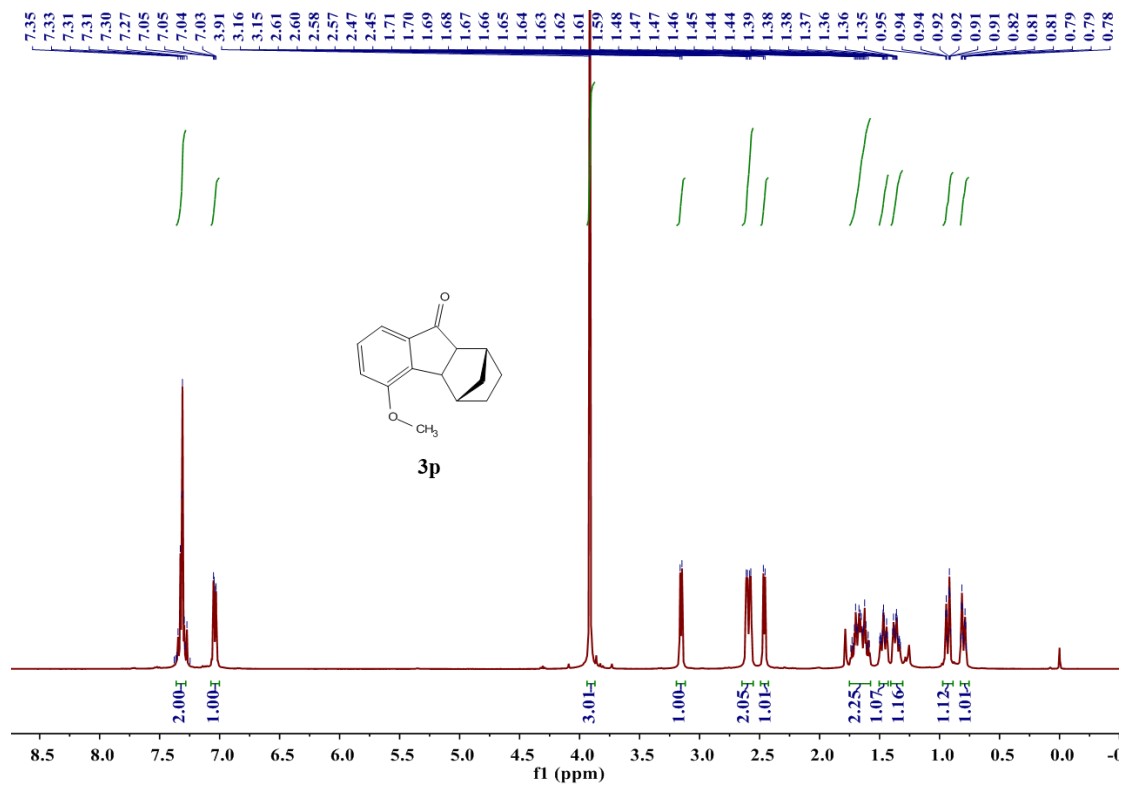

<sup>1</sup>H NMR for compound **3p**

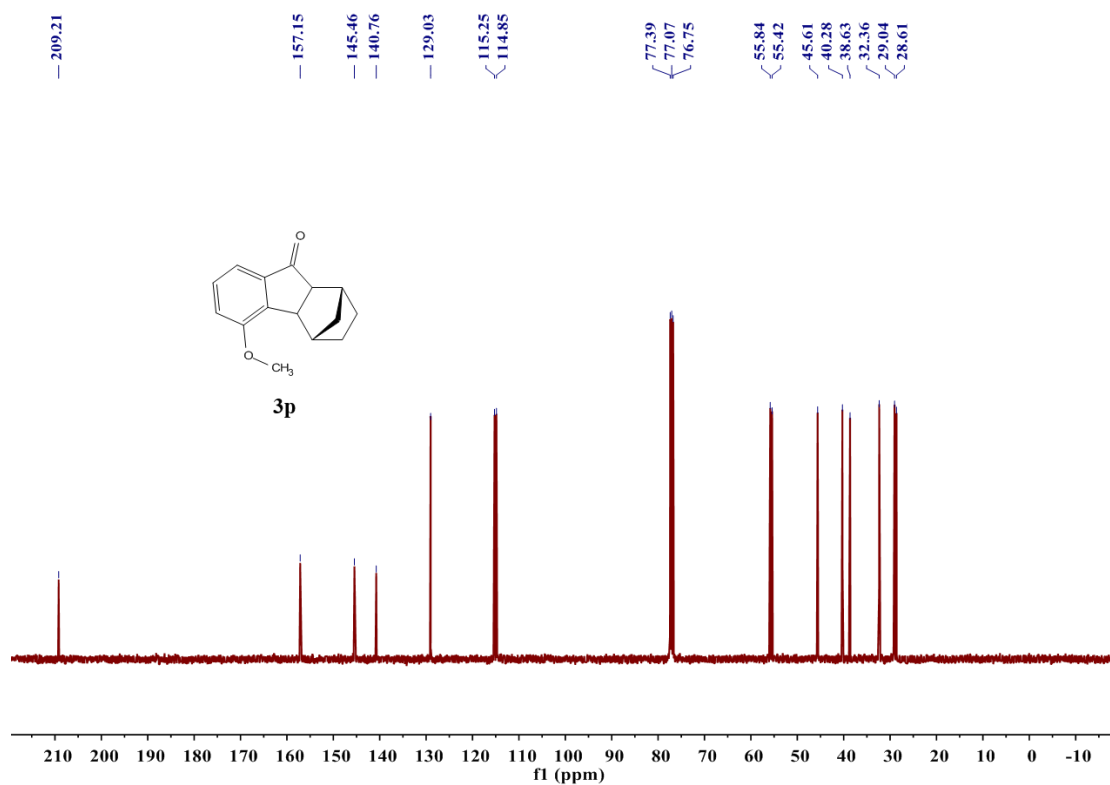

<sup>13</sup>C NMR for compound **3p**

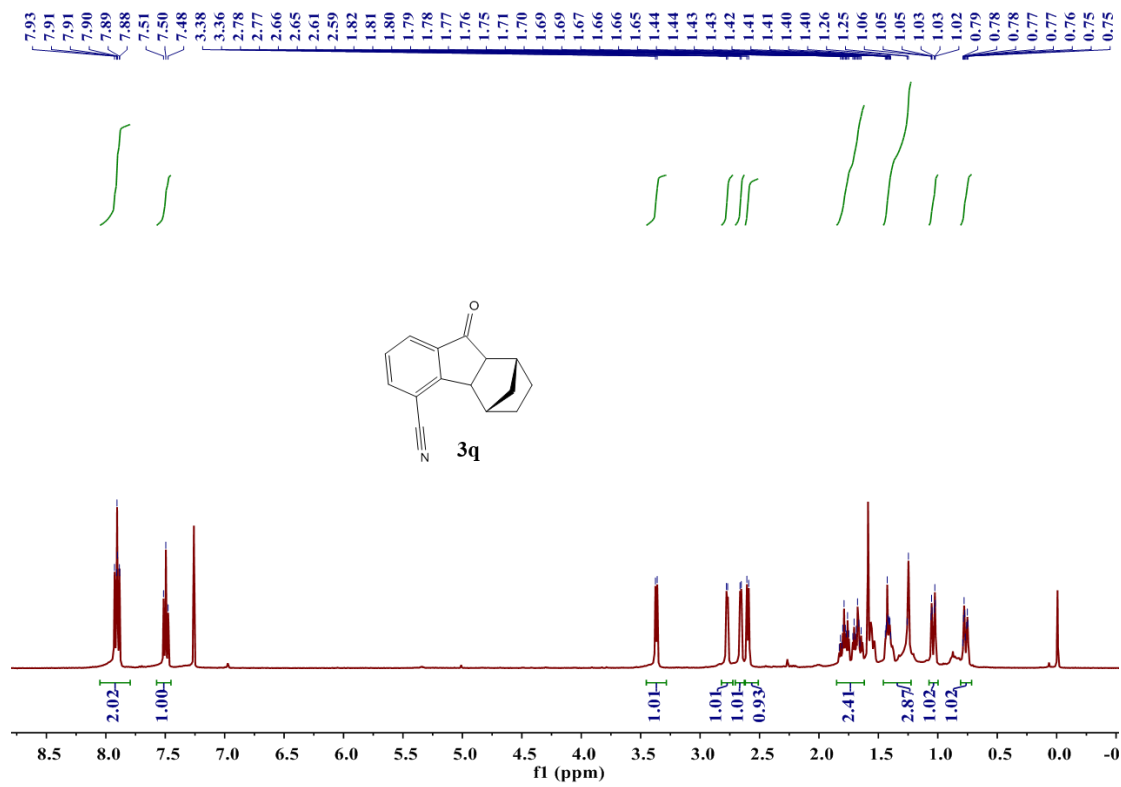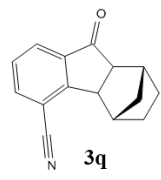

<sup>1</sup>H NMR for compound **3q**

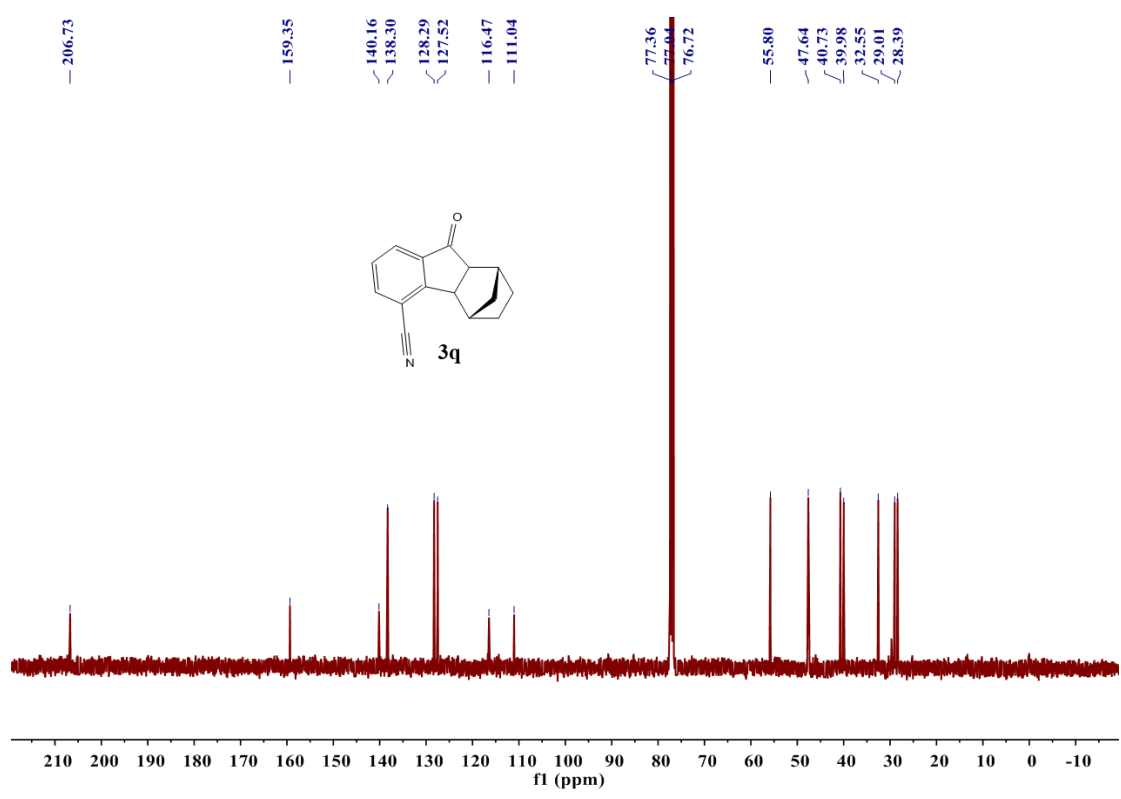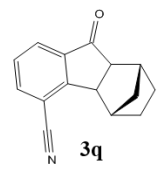

<sup>13</sup>C NMR for compound **3q**

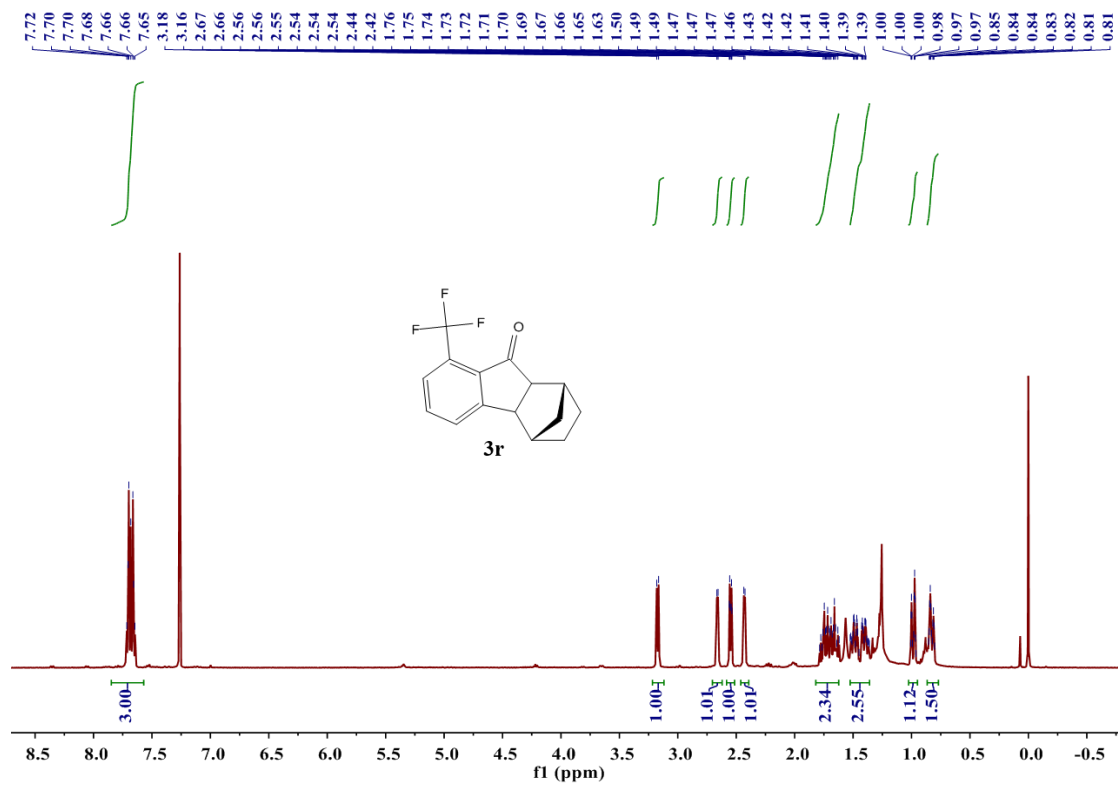

<sup>1</sup>H NMR for compound **3r**

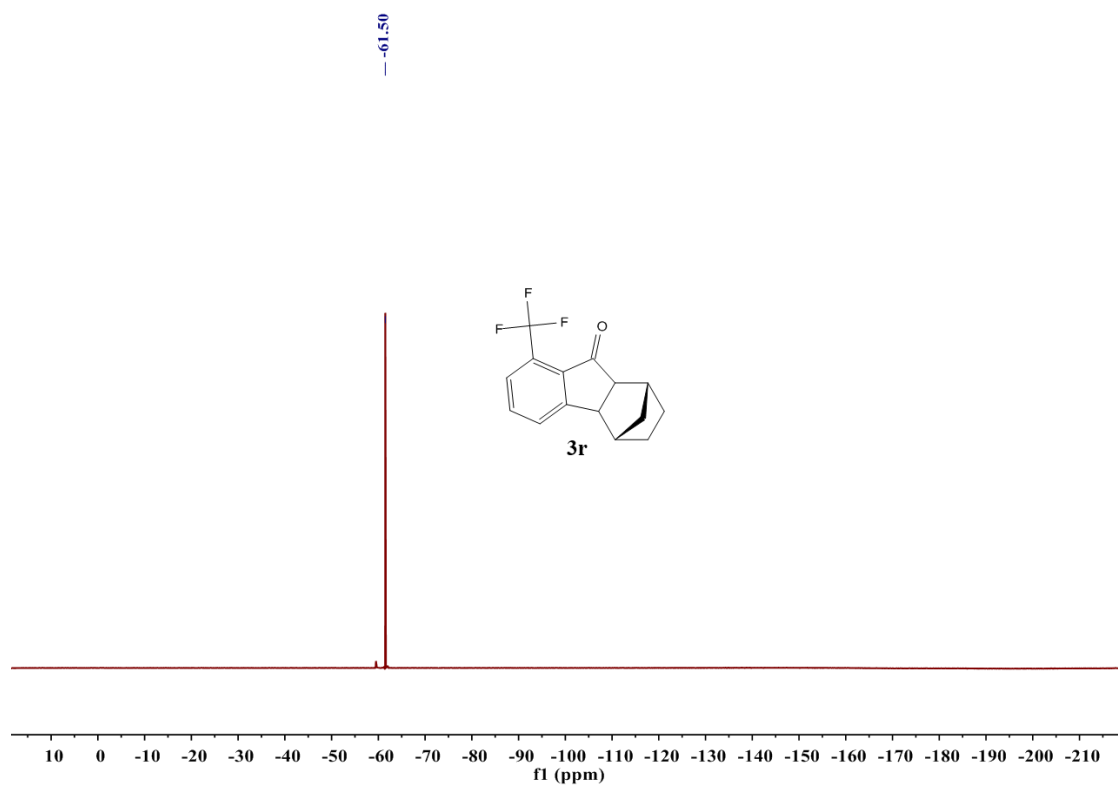

<sup>19</sup>F NMR for compound **3r**

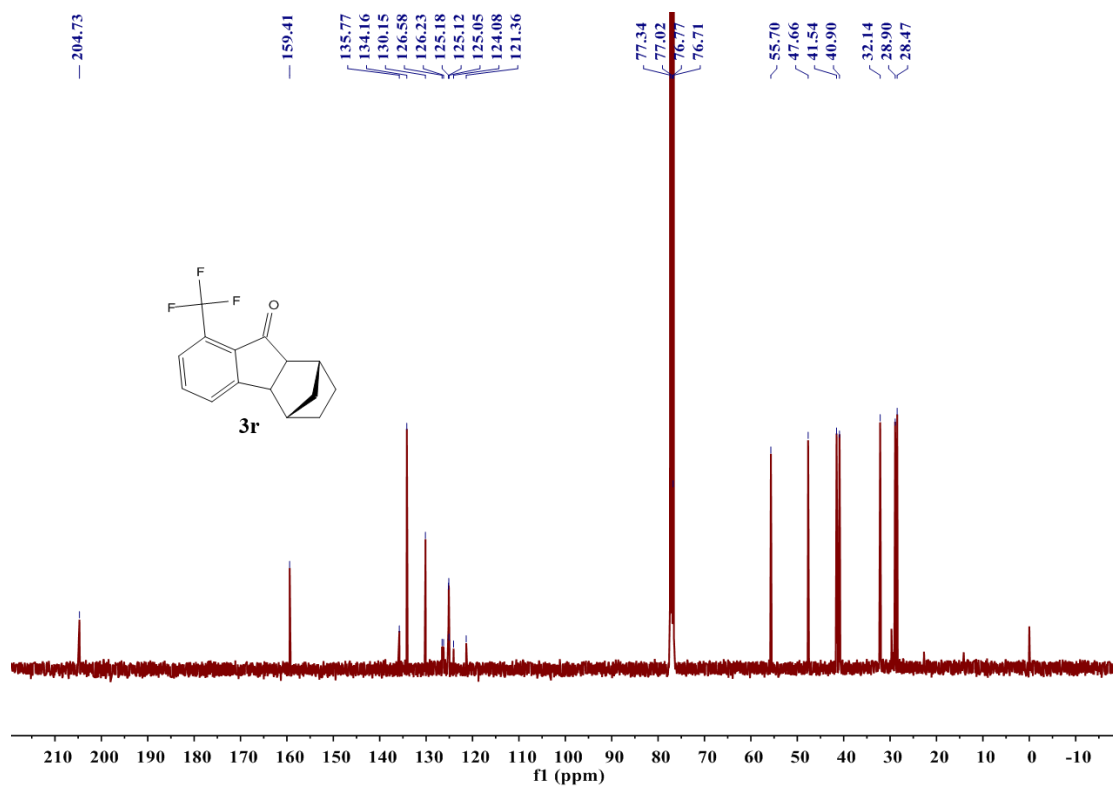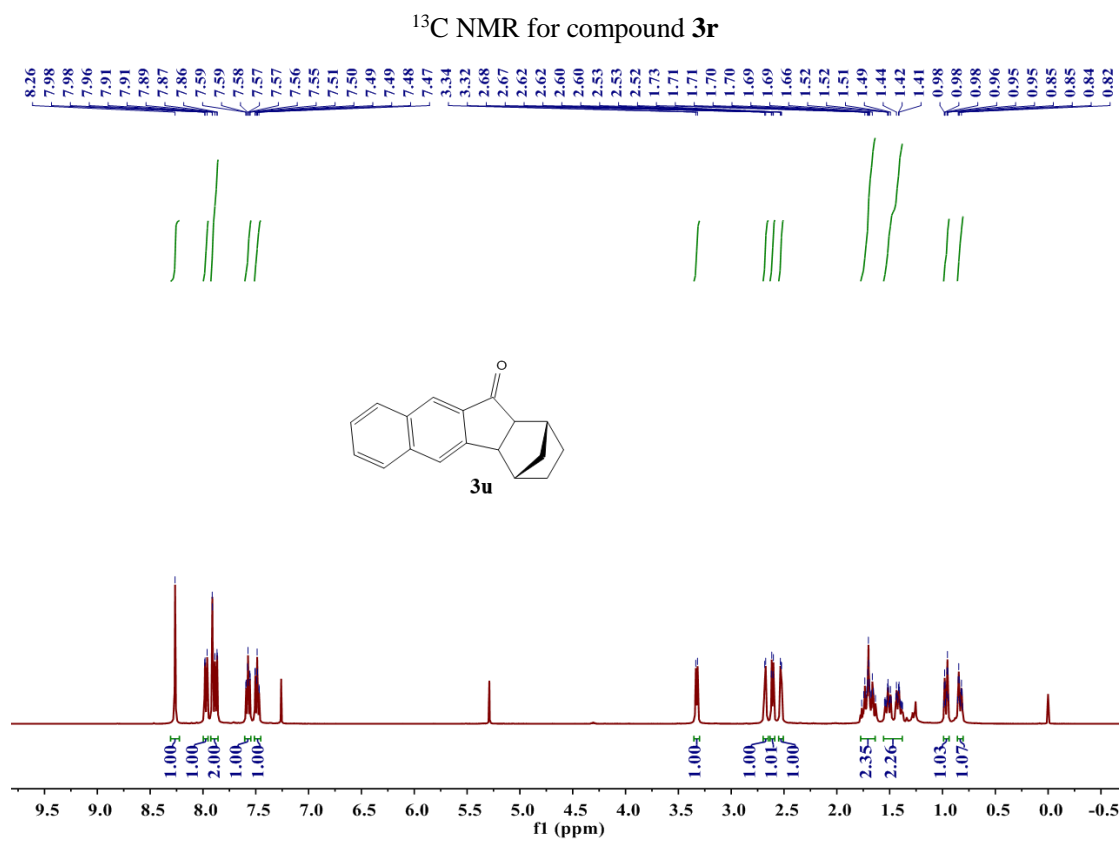



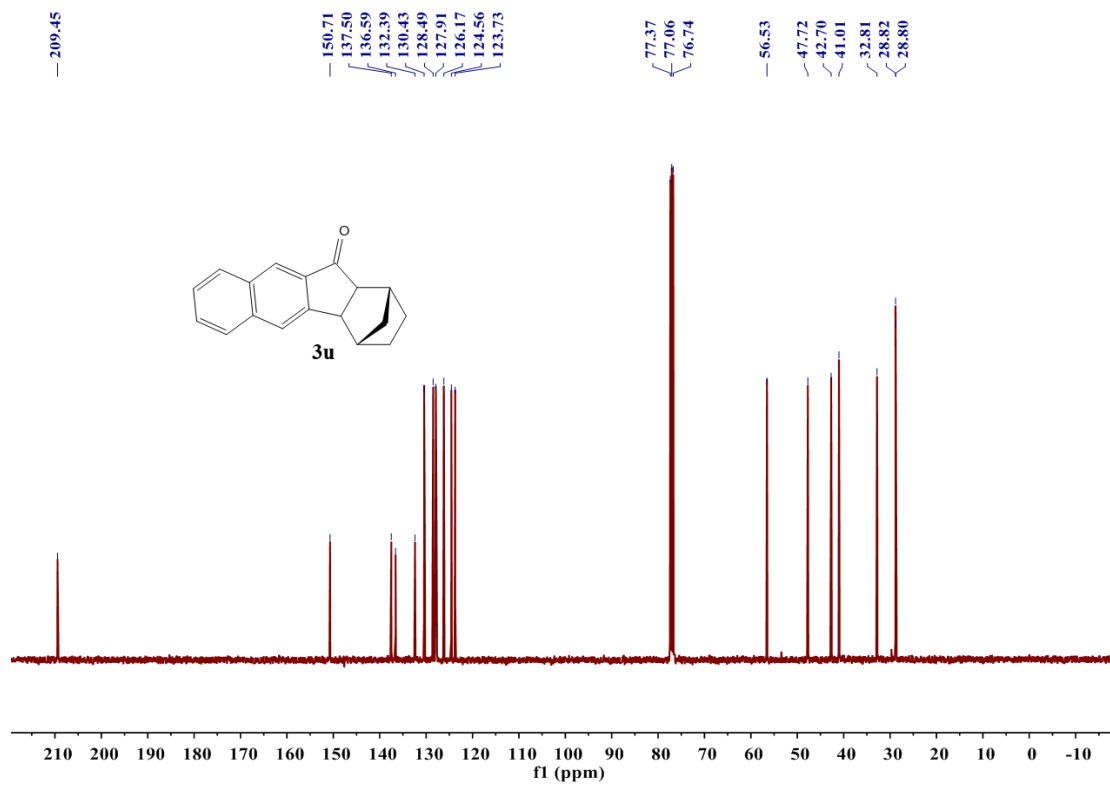

$^{13}\text{C}$  NMR for compound **3u**

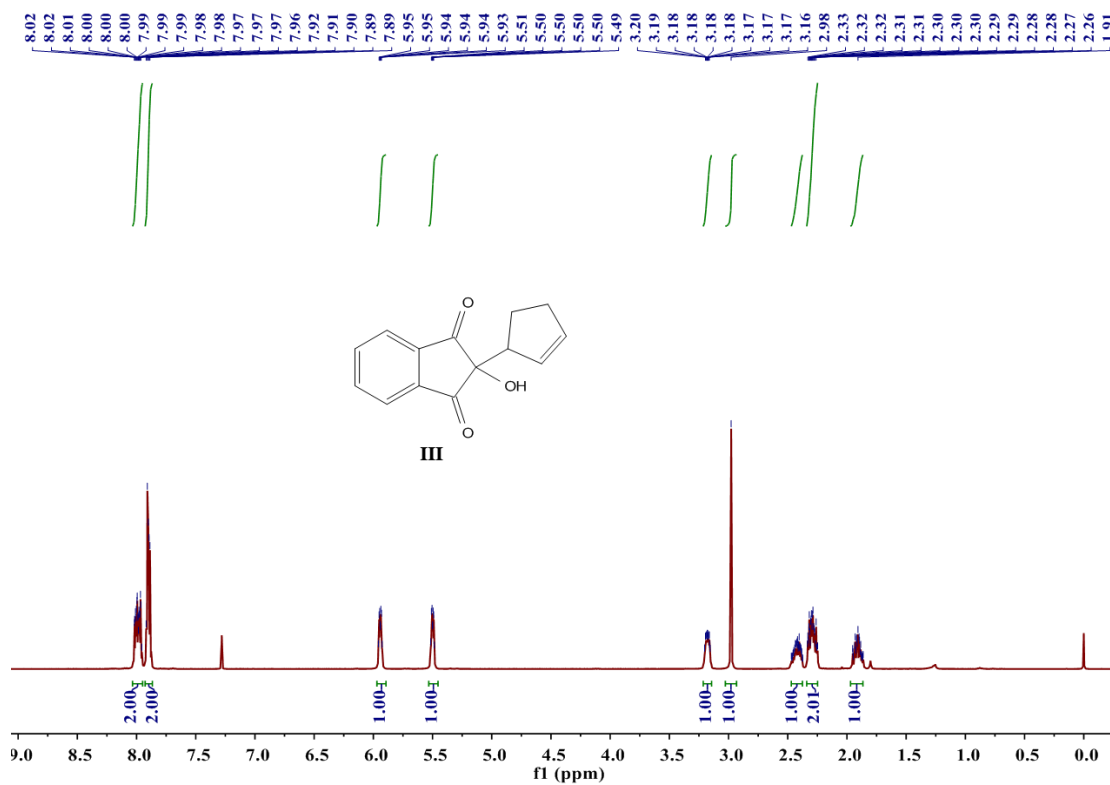

$^1\text{H}$  NMR for compound **III**

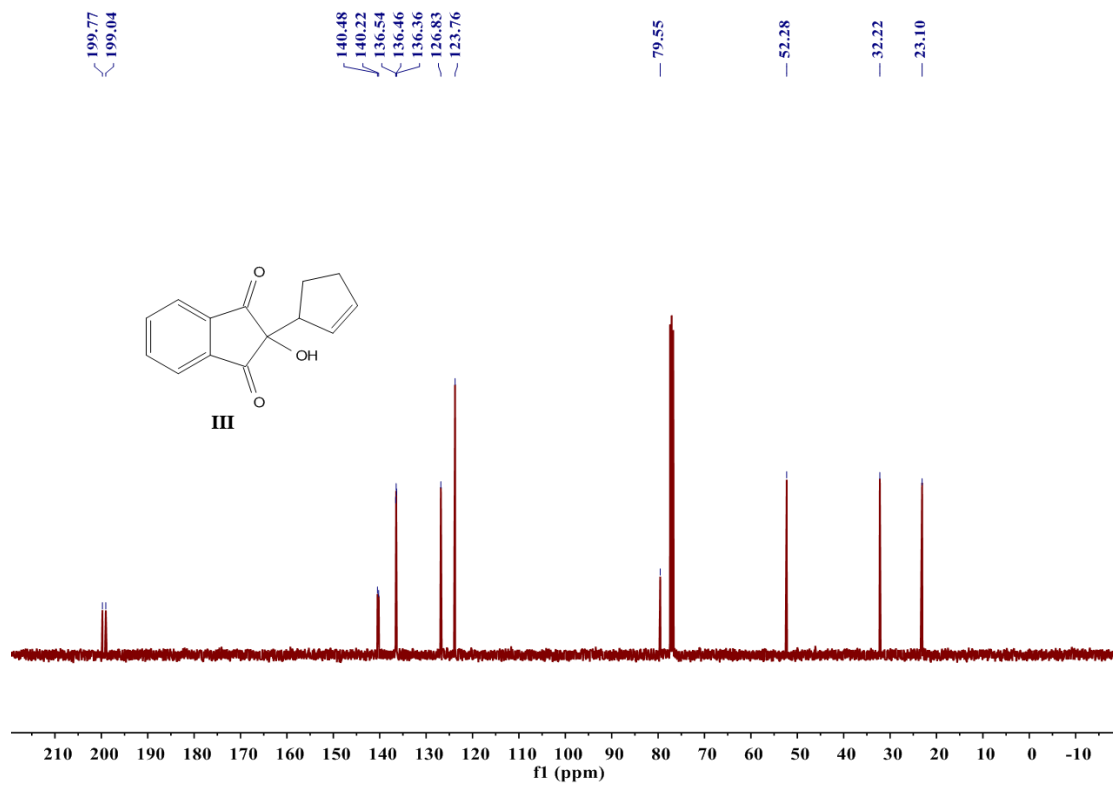

$^{13}\text{C}$  NMR for compound III

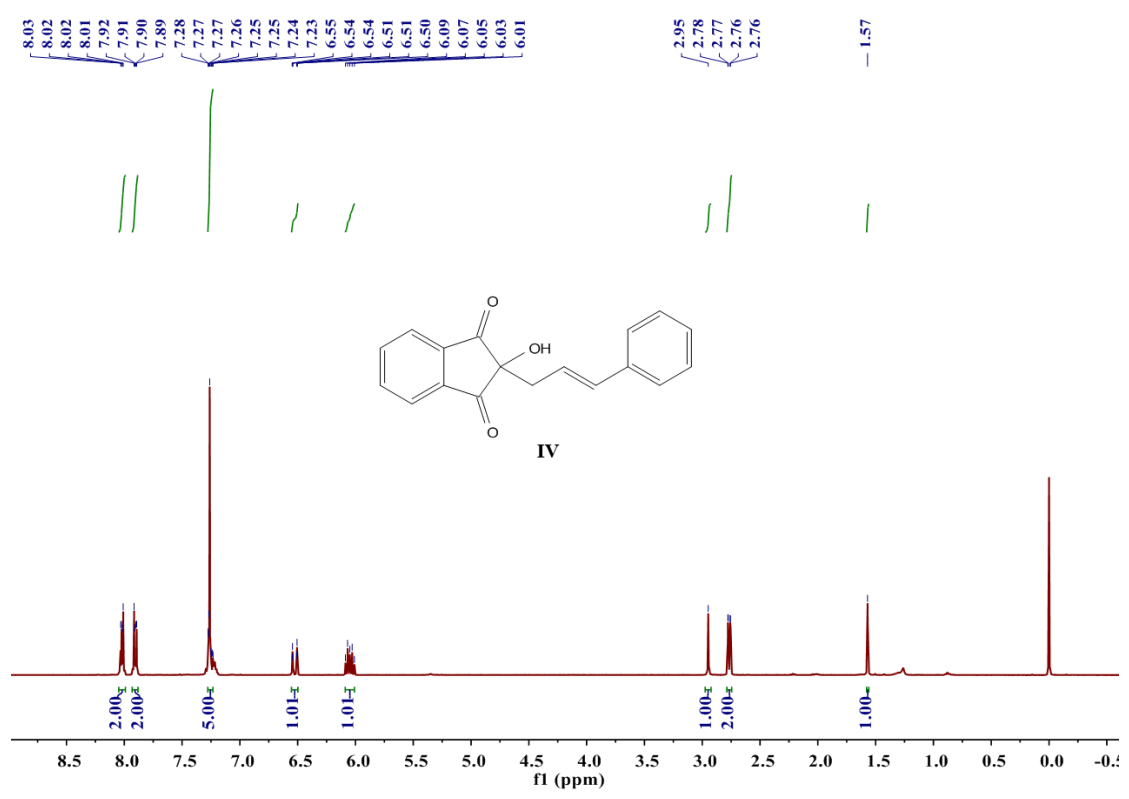

$^1\text{H}$  NMR for compound IV

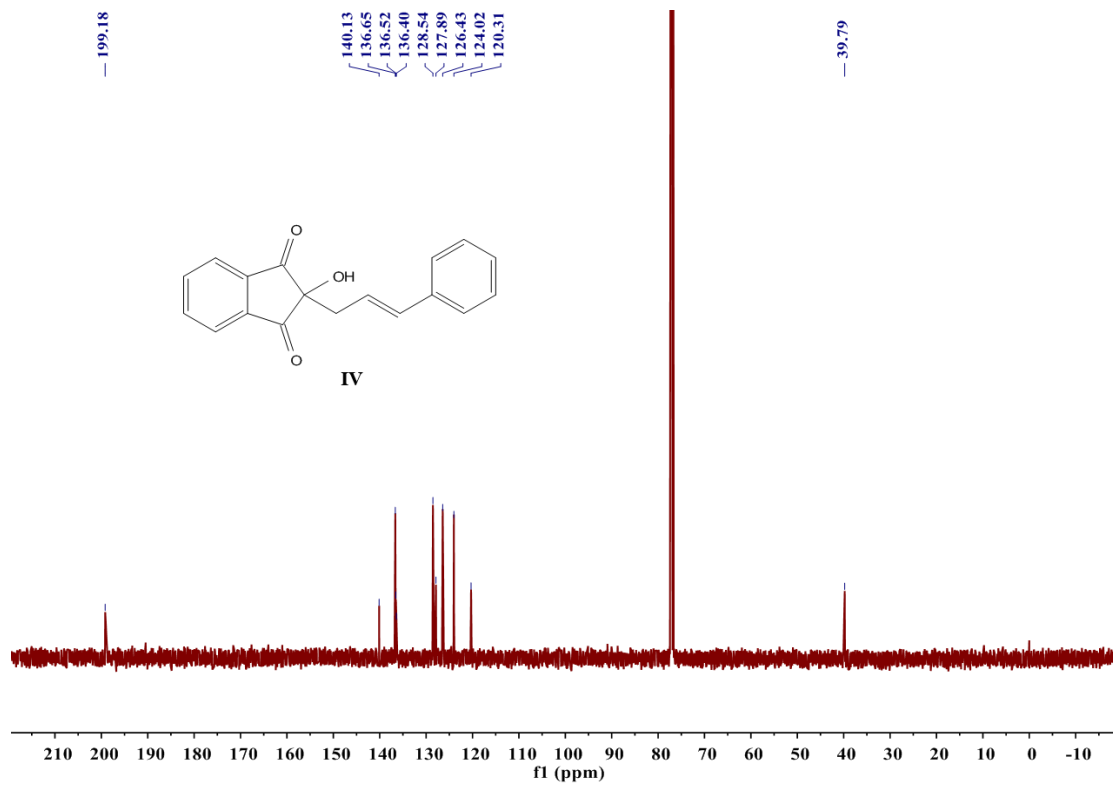

$^{13}\text{C}$  NMR for compound IV

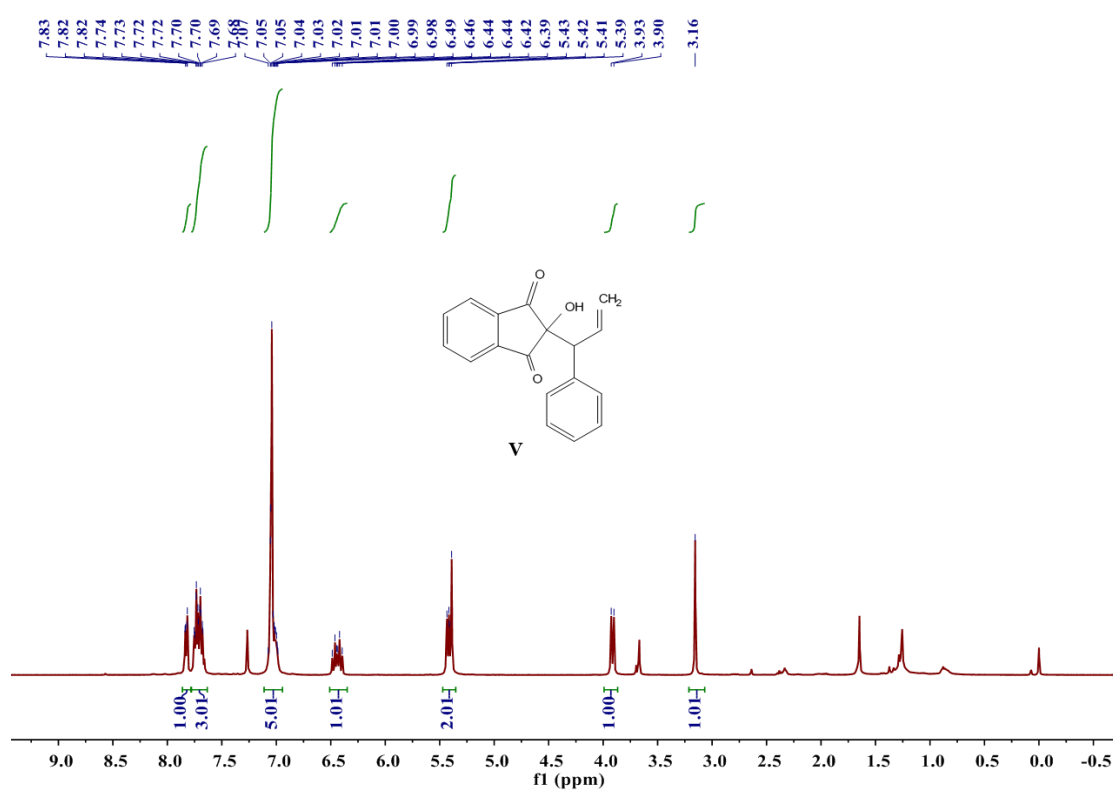

$^1\text{H}$  NMR for compound V

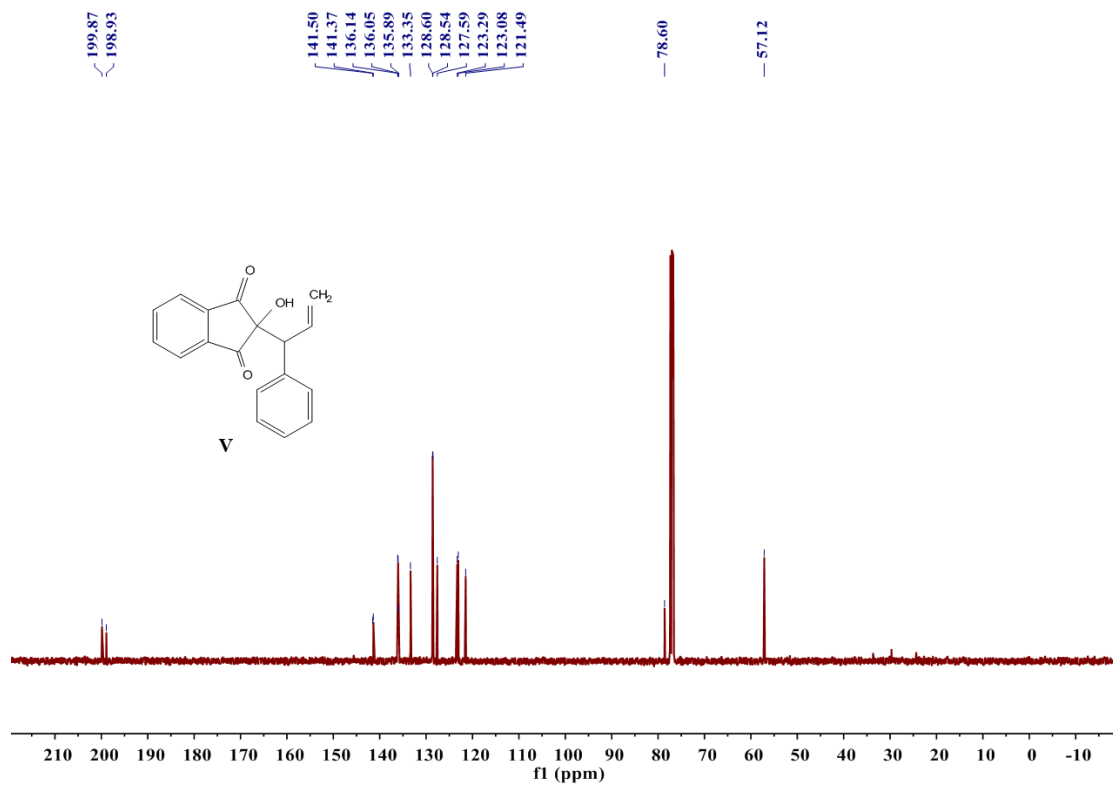

<sup>13</sup>C NMR for compound V
